# Supplementary material for: Rationale and design of the Self-TI Study protocol: a cross-sectional human papillomavirus self-testing pilot study among transgender adults in England
Source: PubMed Central journal article supplement — BMJ Open. 2024 Jul 4;14(7):e086099. doi: 10.1136/bmjopen-2024-086099 (PMC11227791; doi:10.1136/bmjopen-2024-086099), 2024-07-04
Supplement: bmjopen-2024-086099.draft_revisions.pdf [file bmjopen-2024-086099.draft_revisions.pdf]

# BMJ Open

BMJ Open is committed to open peer review. As part of this commitment we make the peer review history of every article we publish publicly available.

When an article is published we post the peer reviewers' comments and the authors' responses online. We also post the versions of the paper that were used during peer review. These are the versions that the peer review comments apply to.

The versions of the paper that follow are the versions that were submitted during the peer review process. They are not the versions of record or the final published versions. They should not be cited or distributed as the published version of this manuscript.

BMJ Open is an open access journal and the full, final, typeset and author-corrected version of record of the manuscript is available on our site with no access controls, subscription charges or pay-per-view fees (<http://bmjopen.bmj.com>).

If you have any questions on BMJ Open's open peer review process please email [info.bmjopen@bmj.com](mailto:info.bmjopen@bmj.com)

# BMJ Open

## Rationale and design of The Self-TI Study: an HPV self-testing pilot study among transgender adults

|                               |                                                                                                                                                                                                                                                       |
|-------------------------------|-------------------------------------------------------------------------------------------------------------------------------------------------------------------------------------------------------------------------------------------------------|
| Journal:                      | <i>BMJ Open</i>                                                                                                                                                                                                                                       |
| Manuscript ID                 | bmjopen-2024-086099                                                                                                                                                                                                                                   |
| Article Type:                 | Protocol                                                                                                                                                                                                                                              |
| Date Submitted by the Author: | 05-Mar-2024                                                                                                                                                                                                                                           |
| Complete List of Authors:     | Jackson, Sarah ; National Cancer Institute<br>O'Callaghan, Stewart; OUTPatients<br>Ward, Elanore; Cambridge University Hospitals NHS Foundation Trust<br>Berner, Alison ; Queen Mary University of London<br>Clarke, Megan; National Cancer Institute |
| Keywords:                     | Human Papillomavirus Viruses, Transgender Persons, Uterine Cervical Neoplasms, Health Equity                                                                                                                                                          |
|                               |                                                                                                                                                                                                                                                       |

SCHOLARONE™  
Manuscripts

1  
2  
3 **Rationale and design of The Self-TI Study: an HPV self-testing pilot study among**  
4 **transgender adults**  
5  
6

7 Sarah S. Jackson,<sup>1\*</sup> Stewart O'Callaghan,<sup>2</sup> Elanore Ward,<sup>3</sup> Megan A. Clarke,<sup>1</sup> and  
8 Alison May Berner<sup>4</sup>  
9  
10

11  
12  
13  
14 **Affiliations:**

15 <sup>1</sup>Division of Cancer Epidemiology and Genetics, National Cancer Institute, Rockville, MD, USA

16 <sup>2</sup>OUTpatients, London, England

17 <sup>3</sup>Cambridge University Hospitals NHS Foundation Trust, Cambridge, England.

18 <sup>4</sup>Barts Cancer Institute, Queen Mary University of London, London, England  
19  
20  
21  
22  
23  
24

25 \*Corresponding author:

26 Sarah S. Jackson, PhD, MPH

27 Infections and Immunoepidemiology Branch

28 Division of Cancer Epidemiology and Genetics

29 National Cancer Institute

30 Rockville, MD

31 Sarah.jackson@nih.gov  
32  
33  
34  
35  
36  
37  
38  
39  
40  
41  
42  
43  
44  
45  
46  
47  
48

49 **Word count:** Abstract: 334; Text: 3,272; Tables: 2, Figures: 1; Supplemental files: 1  
50

51 **Key words:** human papillomavirus, HPV, transgender and non-binary, cancer  
52 screening, cervical cancer, anal cancer  
53  
54  
55  
56  
57  
58

## Abstract

**Introduction:** Persistent infection with high-risk human papillomavirus (hrHPV) is the causal agent of several cancers including cervical, anal, and oropharyngeal cancer.

Transgender men and transmasculine non-binary (TMNB) people with a cervix are much less likely to undergo cervical cancer screening than cisgender women.

Transgender women and transfeminine non-binary (TWNB) people assigned male at birth may be at increased risk of HPV. Both TMNB and TWNB people face many barriers to HPV testing including medical mistrust due to stigma and discrimination.

**Methods and analysis:** The Self-TI Study (Self-TI) is a pilot study designed to measure acceptability and feasibility of HPV self-testing among transgender and non-binary people in England. TMNB people aged 25–65, with at least one year of testosterone and TWNB people, aged 18 and over are eligible to participate. Participants self-collect up to four samples: an oral rinse, a first void urine sample, a vaginal swab (if applicable), and an anal swab. TMNB participants are asked to have an additional clinician-collected cervical swab taken following their routine Cervical Screening Programme sample. TWNB are asked to take a self-collection kit to perform additional self-collection at home and mail the samples back to the clinic. Acceptability is assessed by a self-administered online survey and feasibility is measured as the proportion of samples returned in the clinic and from home.

**Ethics and dissemination:** Self-TI received ethical approval from the Regulatory Ethics Committee of Wales 4 (Wales REC 4) and Ethical Review Panel within the Division of Cancer Epidemiology and Genetics at the US National Cancer Institute. Self-TI was co-produced by members of the transgender and non-binary community, who

1  
2  
3 served as authors, collaborators, and members of the patient and public involvement  
4 (PPI) group. Results of this study will be shared with the community prior to being  
5  
6 published in peer-reviewed journals and the PPI group will help to design the results  
7  
8 dissemination strategy. The evidence generated from this pilot study could be used to  
9  
10 inform a larger, international study of HPV self-testing in the transgender and non-binary  
11  
12 community.  
13  
14  
15

16  
17  
18 **Trial registration number:** NCT05883111  
19

### 20 21 **Strengths and Limitations**

- 22  
23 • The study addresses the lack of evidence around acceptability of human  
24 papillomavirus (HPV) self-sampling in transgender and non-binary people.  
25  
26
- 27 • This study collects samples from four body sites including an oral rinse, a urine  
28 sample, a vaginal swab, and an anal swab to assess correlation between  
29 samples.  
30  
31
- 32 • This pilot study examines the concordance between self-collected and clinician-  
33 collected samples.  
34  
35
- 36 • This pilot study offers participants an at-home collection kit to assess the  
37 feasibility of HPV testing at home.  
38  
39
- 40 • Findings from this study will be used to inform a larger, international study.  
41  
42  
43  
44  
45  
46  
47  
48  
49  
50  
51  
52  
53  
54  
55  
56  
57  
58  
59  
60

## INTRODUCTION

Persistent infection with one of 12 high-risk human papillomavirus (hrHPV) genotypes is the causative agent of several cancers including cervical, anogenital, and oropharyngeal.<sup>1</sup> The widespread implementation of cervical cancer screening with Pap cytology or HPV testing, combined with HPV vaccination, has greatly reduced cervical cancer incidence and mortality.<sup>2</sup> Consensus guidelines for anal cancer screening now include transgender women.<sup>3 4</sup>

Transgender men and transmasculine non-binary (TMNB) adults (those who were registered female at birth and have a masculine or non-binary gender identity) are less likely to have ever undergone cervical cancer screening than cisgender women.<sup>5 6</sup> As many as one third of TMNB adults are not up-to-date with recommended screening guidelines.<sup>7 8</sup> Among those screened, TMNB patients are eight times more likely than cisgender women to have an inadequate Pap where the test cannot be evaluated for a variety of reasons such as lack of sufficient cellularity or bleeding resulting from testosterone induced cervical and vaginal atrophy.<sup>9</sup> TMNB adults face many additional barriers to cervical cancer screening than cisgender people, including an increased likelihood of discrimination in medical settings.<sup>10-12</sup> During gynecologic exams, TMNB patients may experience gender dysphoria (distress associated with the incongruence between gender identity and sex registered at birth) due to the focus on genitalia and the gendered nature of cervical cancer screening, such as feminine waiting rooms and expectations of gender conformity.<sup>13-15</sup> Clinicians may also erroneously believe that TMNB are not a risk for HPV due to incorrect assumptions about TMNB anatomy and

1  
2  
3 sexual practices, and are less likely to recommend screening.<sup>14</sup> Further, TMNB patients  
4  
5 may be less likely to be vaccinated against HPV than cisgender women.<sup>16</sup>  
6  
7

8 Transgender women and transfeminine non-binary (TWNB) adults (those who  
9  
10 were registered male at birth and have a female or non-binary gender identity) may be  
11  
12 at increased risk of HPV infection compared to cisgender individuals. England began a  
13  
14 national HPV immunisation programme for adolescent girls with the bivalent HPV  
15  
16 vaccine in 2008 and switched to the quadrivalent in 2012.<sup>17</sup> The UK implemented a  
17  
18 gender-neutral vaccination program in 2019 with a catch-up programme for people up to  
19  
20 the age of 45 years who are considered high risk for HPV (e.g., men who have sex with  
21  
22 men).<sup>18</sup> Though transgender and non-binary people may be eligible for vaccination  
23  
24 through the catch-up programme, barriers to healthcare and lack of perceived risk  
25  
26 means that many TWNB adults may still be unvaccinated.<sup>19</sup> Additionally, co-infection  
27  
28 with HIV, which may be elevated among TWNB adults compared to the general  
29  
30 population,<sup>20</sup> increases the risk of persistent HPV infection<sup>21-23</sup> and HPV associated  
31  
32 cancers.<sup>24 25</sup> One small US study reported a study HPV prevalence of 89% in anal and  
33  
34 9% in oral specimens from TWNB adults.<sup>26</sup> A Brazilian study of 268 transgender women  
35  
36 reported a study prevalence to be 77% in anal, 34% in genital, and 11% oral  
37  
38 specimens.<sup>27</sup> Studies from both The Netherlands and Thailand estimate a 20%  
39  
40 prevalence of neovaginal hrHPV, though these two studies had a high proportion of  
41  
42 invalid HPV results, suggesting the true prevalence may be higher.<sup>28 29</sup> The oncogenic  
43  
44 potential of persistent hrHPV infection in the vagina of TWNB is poorly understood and  
45  
46 current guidelines do not recommend screening for this population.<sup>30</sup> Both low- and  
47  
48  
49  
50  
51  
52  
53  
54  
55  
56  
57  
58  
59  
60

1  
2  
3 high-grade squamous intraepithelial lesions have been reported in the vagina of TWNB  
4  
5 adults but incidence data is lacking.<sup>31 32</sup>  
6

7  
8 Prior research conducted in cisgender women has shown that self-sampling for  
9  
10 hrHPV with PCR-based assays has comparable performance to clinician-collected  
11  
12 samples for the detection of cervical hrHPV.<sup>33 34</sup> Limited research suggests that most  
13  
14 TMNB patients may prefer HPV testing by self-collection,<sup>35 36</sup> though patients have  
15  
16 expressed concern about the lack of evidence-based guidelines specific to TMNB to  
17  
18 inform their preference.<sup>35 37</sup> Indeed, only one small study<sup>38</sup> has compared the  
19  
20 performance of clinician- and self-collected samples in TMNB, showing good  
21  
22 concordance; however more research is needed to assess whether this is an  
23  
24 acceptable approach for cervical screening in TMNB. Reisner *et al.*<sup>39</sup> found a study HPV  
25  
26 prevalence of 16% among 130 TM participants and that HPV testing by self-sample  
27  
28 showed good concordance with clinician-collected samples. Similarly, one US study that  
29  
30 included TWNB adults found that people were more likely to engage in anal cancer  
31  
32 screening with an at-home self-collection kit than attend a clinician-collected screening  
33  
34 appointment.<sup>40</sup>  
35  
36  
37  
38  
39

40 The objective of this pilot study is to assess the feasibility and acceptability of  
41  
42 HPV self-testing at four body sites among TMNB and TWNB adults.  
43

## 44 **METHODS AND ANALYSIS**

### 45 **Study design and setting**

46  
47  
48 The Self-TI Study (Self-TI) is a pilot study examining the acceptability and  
49  
50 feasibility of HPV self-testing among transgender and non-binary people conducted in  
51  
52 England (IRAS# 319364 and clincialtrials.gov NCT05883111). The study received  
53  
54  
55  
56  
57  
58  
59  
60



1  
2  
3 ethical approval from the Research Ethics Committee (REC) of Wales 4 (Wales REC 4,  
4 #23/WA/0266) and the Ethical Review Panel within the Division of Cancer Epidemiology  
5 and Genetics at the US National Cancer Institute (NCI) (#3G009-05). Amendments to  
6 the protocol and study materials are approved by the REC and the protocol was last  
7 revised on January 23, 2024 (4<sup>th</sup> revision). Before taking part in this pilot study, all  
8 participants provide informed written consent to participate to the study staff.  
9  
10 Participants are asked if they consent to future use of their research specimens;  
11 otherwise specimens will be destroyed after the aims of the study protocol are met.  
12  
13  
14  
15  
16  
17  
18  
19  
20  
21

### 22 **Study setting and participant recruitment**

23  
24 Enrolment began in February 2024 and will continue for one year. Self-TI seeks  
25 to enroll 50 participants who identify as TMNB with a cervix and 50 participants who  
26 identify as TWNB assigned male at birth. Participants are recruited at one of three  
27 clinical sites in England: CliniQ or Ambrose Kings sexual health clinics in London, or  
28 Clinic-T in Brighton. These sites were chosen as they are in areas with large  
29 transgender and non-binary populations, their providers are specialists in transgender  
30 and non-binary sexual health, and the clinic staff have experience conducting research  
31 studies. Participants can be recruited and pre-screened for study eligibility when they  
32 book an appointment for a cervical cancer screening (TMNB study group only) or a  
33 sexual health screening (TWNB study group only). Recruitment occurs through  
34 advertisement posters and banners placed in the clinics, and flyers placed in gender  
35 identity clinics and general practitioners' offices known to have transgender and non-  
36 binary patients. Self-TI has created a website ([www.self-ti.com](http://www.self-ti.com)), which contains  
37 information on the study, HPV and cancer education, and links to contact the study sites  
38  
39  
40  
41  
42  
43  
44  
45  
46  
47  
48  
49  
50  
51  
52  
53  
54  
55  
56  
57  
58  
59  
60

1  
2  
3 to enrol. Self-TI also commissioned a well-known trans activist and artist in England, to  
4 record a 45 second advertisement video. This video is posted the activist's social media  
5 sites (Twitter, Instagram, and Tik Tok), other LGBTQ+ cancer charities in England, and  
6 the Self-TI's website and social media sites. The Standard Protocol Items:  
7  
8  
9

10  
11  
12 Recommendations for Interventional Trials (SPIRIT) checklist is available as an online  
13 supplemental file.<sup>41</sup>  
14

## 15 16 17 **Participants**

18  
19 Individuals who identify as TMNB with a cervix, aged 25–65, with at least one  
20 year of self-reported testosterone therapy, are eligible to participate in the TMNB study  
21 group. Testosterone exposure is a requirement of study participation because it may  
22 affect the accuracy and acceptability of clinician- and self-collected HPV testing.  
23  
24  
25

26  
27 Individuals who identify as TWNB, aged 18 and over, are eligible to participate in the  
28 TWNB study group. TWNB participants with a vagina are preferentially selected into the  
29 study, with the first three months of enrolment restricted to individuals who had  
30 undergone vaginoplasty. After three months, the study team will evaluate whether it is  
31 feasible to reach the targeted sample size with this restriction and if not, the eligibility  
32 criterion will be removed. Individuals with a vagina must have undergone vaginoplasty  
33 greater than one year prior to entering the study due to safety concerns over self-  
34 sampling on recently healed epithelium. All participants are given a participant  
35 information sheet, which is discussed with study staff as part of informed consent  
36 procedures.  
37  
38  
39  
40  
41  
42  
43  
44  
45  
46  
47  
48  
49  
50

## 51 **Data collection**

Study activities and timeline are presented in Table 1 and Figure 1. After giving consent, participants fill out demographics and medical history questionnaires. The demographics form asks for sexual orientation, race and ethnicity, and height and weight. The medical history form asks about previous cancer screening, previous cancer diagnoses, HPV vaccination, hormone therapy, and HIV status. Study staff review these questionnaires with the participants to make sure they are complete and to answer any questions the participants have.

**Table 1. Study activities and timeline**

| Study procedure          | Prior to Day 1 |                  | In Clinic Day 1  |               | At Home<br>≤ 4 weeks<br>(TWNB only) |
|--------------------------|----------------|------------------|------------------|---------------|-------------------------------------|
|                          | Screening      | Clinician        | Self-Sampling    | Self-Sampling |                                     |
| Eligibility assessment   | X              |                  |                  |               |                                     |
| Informed consent         |                |                  | X                |               |                                     |
| Demographics             |                |                  | X                |               |                                     |
| Medical history          |                |                  | X                |               |                                     |
| Vaginal swab             |                |                  | X*               |               | X*                                  |
| Anal swab                |                |                  | X                |               | X                                   |
| Oral rinse               |                |                  | X                |               | X                                   |
| Urine                    |                |                  | X                |               |                                     |
| Cervical swab            |                | X<br>(TMNB only) |                  |               |                                     |
| Survey                   |                |                  | X<br>(TMNB only) |               | X                                   |
| Adverse event assessment |                | X                | X                |               | X                                   |

\*All TMNB and only TWNB who have undergone vaginoplasty.

Abbreviations: TMNB = transmasculine and non-binary people with a cervix; TWNB= trans women and non-binary people assigned male at birth

## Sampling

All participants are asked to self-collect samples in the clinic in the following order: oral rinse, urine, vagina, and anus (collection materials are provided in Table 2). Each participant will receive a self-sampling kit with written instructions for self-collection that includes a QR code linked to an instructional video. Study staff will also explain the self-collection procedures to the participants.

**Table 2. Collection materials of study specimens**

| Specimen Type       | Collection Method                                                    |
|---------------------|----------------------------------------------------------------------|
| Vaginal/neo-vaginal | Evalyn® Brush (Rovers® Medical, Belgium) or Dacron swab (DuPont, US) |
| Anal                | FLOQSwab (COPAN Diagnostics Inc., US)                                |
| Oral rinse          | Scope (Proctor and Gamble, US)                                       |
| Urine               | Colli-Pee (Novosanis, Belgium)                                       |
| Cervical            | Endocervical broom (Hologic, US)                                     |

The participants use Scope mouthwash (Proctor and Gamble, US) to collect buccal cells and a Colli-pee® collection device (Novosanis, Belgium) to collect first void urine (Table 2). The Colli-pee® device was selected as it has been used successfully by sexual and gender minority participants in other studies and can accommodate a variety of genital anatomies.

For the vaginal sample, participants have a choice to use either an Evalyn Brush® (Rovers Medical, Belgium) or a Dacron swab (DuPont, US) (Table 2), if applicable. The Evalyn Brush® was chosen for several features which make it easier to use for populations unfamiliar with self-sampling. It has wings to guide the participant as to how far they should insert the device, a plunger which releases the bristle brush to the cervix and clicks to aid in the counting of the rotations. Participants who prefer a slimmer vaginal swab are provided with a Dacron swab upon request (Table 2).

1  
2  
3 Participants use a FLOQSwab® (COPAN Diagnostics Inc., US) to collect the anal  
4  
5 sample (Table 2).  
6

7  
8 After the self-administered samples are collected, TMNB participants have a  
9  
10 pelvic exam as part of the standard cervical cancer screening. In England, individuals  
11  
12 with a cervix are invited to participate in the National Cervical Screening Programme  
13  
14 (CSP) every 3 years for those between the ages of 25-49 and every 5 years for those  
15  
16 between the ages of 50-65. Screening is conducted with a primary HPV test and if  
17  
18 positive, a reflex cervical sample is sent for cytology. Self-TI is paired with the CSP so  
19  
20 that TMNB individuals do not need to undergo pelvic exams more than once. In Self-TI,  
21  
22 the clinician will take two cervical swabs; the first for the (CSP) sent to the National  
23  
24 Health Service (NHS) laboratories, and the second for the clinician-collected sample for  
25  
26 Self-TI using an endocervical broom (Hologic, US). The CSP sample is collected first so  
27  
28 that if the participant declines further samples the standard of care is met.  
29  
30  
31

32  
33 After TWNB participants collect their self-administered samples, they will be  
34  
35 given a kit to complete a second vaginal (if applicable), anal, and oral rinse sampling at  
36  
37 home. Once collected, the participant places the dry brushes and samples in the pre-  
38  
39 addressed, postage paid mailer provided before dropping it in the post within one month  
40  
41 of their first study visit. The kit includes written instructions with a QR code linked to an  
42  
43 instructional video. Study staff follow up with TWNB study participants on a weekly  
44  
45 basis for up to four weeks to ensure the return of their study samples.  
46  
47  
48

### 49 **Self-administered online survey**

50  
51 After self-collection, participants take a self-administered online survey, which  
52  
53 takes approximately 20–25 minutes to complete. The survey includes questions on  
54  
55  
56  
57  
58  
59  
60

1  
2  
3 sensitive demographic characteristics, acceptability of self-sampling, comparing self-  
4 collected to clinician-collected sampling (TMNB study group only), comparing self-  
5 collected sampling in the clinic to at-home collection (TWNB study group only), history  
6 of HPV vaccination, knowledge of HPV, medical mistrust, and sexual history.  
7  
8 Participants receive a £20 gift card to a large online retailer, as remuneration for their  
9 participation in Self-TI.  
10  
11  
12  
13  
14  
15

## 16 **Outcomes**

17  
18  
19 The primary study outcomes are the acceptability and feasibility of self-sampling  
20 among participants that will inform a larger study. Acceptability is measured by the  
21 physical and emotional responses to self-sampling for each collection method using a 7-  
22 point Likert scale. Feasibility is measured by the proportion of specimens returned from  
23 self-collection in the clinic and those mailed from home.  
24  
25  
26  
27  
28  
29

30  
31 This pilot study will also estimate the study prevalence of HPV (positivity and  
32 genotype) and the correlation of HPV detection between the four self-collected samples.  
33  
34 The concordance between the vaginal self-collected sample and clinician-collected  
35 cervical sample will be estimated among TMNB. Among TWNB, we will estimate the  
36 correlation between the samples collected by participants in the clinic with the samples  
37 collected at home. Finally, Self-TI will collect exploratory data on risk factors associated  
38 with HPV prevalence, which can be fully assessed in a larger trial.  
39  
40  
41  
42  
43  
44  
45

## 46 **HPV testing**

47  
48  
49 The cervical, vaginal, and anal swabs are reconstituted in a plastic vial with  
50 PreservCyt transport medium (ThinPrep PreserveCyt Solution, Hologic, US) before  
51 freezing at -80°C. Oral and urine samples are placed directly into -80°C. Samples are  
52  
53  
54  
55  
56  
57  
58  
59  
60

1  
2  
3 shipped in batches to the Center for Genomic Research (CGR) at NCI. All samples will  
4  
5 be tested using a next-generation sequencing based-assay (TypeSeq) developed by  
6  
7 CGR, which generates a positive/negative result for 51 HPV genotypes.<sup>42</sup>  
8  
9

## 10 **Data management**

11  
12 Data management and project coordination is done at the Division of Cancer  
13  
14 Epidemiology and Genetics at NCI. Study oversight and data management are led by  
15  
16 the study chief investigator (AMB) and the statistician (SSJ). Research staff enter de-  
17  
18 identified participant data into an electronic data capture system. All participant  
19  
20 information (including laboratory data) is confidential and stored in a secure location.  
21  
22 Only the personnel listed on the delegation log will have access to participant data; the  
23  
24 statistician and laboratory personnel have access to deidentified data only. Participant  
25  
26 data are checked at regular intervals for quality assurance. The number of AEs is  
27  
28 expected to be very small and thus an independent Data Monitoring Committee was not  
29  
30 appointed. However, all adverse events will be collected, and severe adverse events  
31  
32 deemed by the chief investigator to be related to study procedures and unexpected, will  
33  
34 be reported to the sponsor within 24 hours and to the REC within 15 days of learning of  
35  
36 the event.  
37  
38  
39  
40  
41

## 42 **Statistical analysis**

43  
44 Acceptability of self-sampling procedures will be measured on the self-  
45  
46 administered online survey, which uses a 7-point Likert scale with 1 indicating strong  
47  
48 disagreement and 7 indicating strong agreement. Summary measures of these  
49  
50 questions will be reported (average score for each question) separately for each group.  
51  
52 For all participants, feasibility will be measured by the proportion of participants who are  
53  
54  
55  
56  
57  
58  
59  
60

1  
2  
3 able to complete the self-collection procedures in the clinic. For TWNB participants, at-  
4  
5 home feasibility will be measured by the proportion of TWNB participants who are able  
6  
7 to complete and return all self-collection procedures at home.  
8  
9

10 For our secondary objectives, we will estimate the prevalence of HPV, overall,  
11  
12 and by genotype in each of the self-collected samples from the two groups, separately.  
13  
14 The phi-coefficient and associated  $P$ -values will be estimated to assess HPV positivity  
15  
16 correlation between the four anatomic sites. Further, we will calculate the Cohen's  
17  
18 kappa statistic as a measure of percent positive agreement of HPV positivity in self-  
19  
20 collected vaginal samples versus the clinician-collected cervical samples among TMNB  
21  
22 and in self-collected in clinic samples versus self-collected at home samples among  
23  
24 TWNB, respectively.  
25  
26  
27

### 28 **Patient and public involvement**

29  
30 A patient and public involvement (PPI) group was formed prior to the submission  
31  
32 of the Self-TI protocol to regulatory bodies. PPI played an important role in the design  
33  
34 and conduct of the study, and participant recruitment. Six group meetings were held  
35  
36 between May 2022–August 2023 with six members. PPI members represented the target  
37  
38 population of Self-TI, including transfeminine, transmasculine, and non-binary  
39  
40 individuals. Authors SSJ, SOC, and EW attended all meetings, which were led either by  
41  
42 SOC or EW who are members of the transgender and non-binary community, and SOC  
43  
44 is the founder of a cancer charity for lesbian, gay, bisexual, transgender, intersex, and  
45  
46 queer individuals. PPI members reviewed the study protocol, data collection forms,  
47  
48 online self-administered survey, advertisement and recruitment plan, instructional video,  
49  
50 and results dissemination plan. Meetings were conducted over Zoom in the evenings to  
51  
52  
53  
54  
55  
56  
57  
58  
59  
60



1  
2  
3 accommodate members' schedules and followed up via email to provide additional  
4  
5 opportunities for written feedback on materials. Online meetings included short  
6  
7 presentations on HPV-related cancer topics given by experts in the field to provide  
8  
9 information exchange. PPI members were compensated for their time with multi-retailer  
10  
11 gift cards to an amount in line with National Institute for Health Research guidelines.  
12  
13

14  
15 Several important suggestions were made by the PPI group and adopted into the  
16  
17 study protocol. The standard Evalyn® brush is manufactured in a dark pink color, which  
18  
19 was suggested could be off putting to our participants, so we worked with the  
20  
21 manufacturers to provide Self-TI with devices in a more neutral blue color. Though the  
22  
23 Evalyn® brush has several features that make it ideal for individuals who are not  
24  
25 familiar with self-sampling, one drawback is that it is slightly thicker than other swabs  
26  
27 used for vaginal sampling. Therefore, it was suggested by the PPI group that  
28  
29 participants be provided with a slimmer swab upon request. Additionally, though it is  
30  
31 preferred that TMNB participants complete the survey in the clinic after their exam, the  
32  
33 PPI group felt that participants should be given the option to complete the survey at  
34  
35 home. This change was implemented and TMNB participants can scan or be emailed a  
36  
37 QR code to the survey link after leaving the clinic if desired. The group felt that some  
38  
39 participants would want to leave the clinic immediately after their speculum exam as it  
40  
41 may result in increased feelings of dysphoria and can be uncomfortable or painful for  
42  
43 some participants.  
44  
45  
46  
47  
48

## 49 **ETHICS AND DISSEMINATION**

50  
51 People with a male gender marker in their medical record are not invited to  
52  
53 participate in the CSP and the laboratory may reject cervical samples from male  
54  
55  
56  
57  
58  
59

1  
2  
3 patients. The chief investigator worked with the laboratories processing CSP samples  
4  
5 for Self-TI participants to ensure samples would not be discarded prior to testing. Senior  
6  
7 staff (AMB and SSJ) also consulted the US National Institutes of Health Bioethics group  
8  
9 about returning study results to the participants. Because the assay under study in Self-  
10  
11 TI is a research test and not approved for clinical use in the UK, participants will not  
12  
13 have their study results returned to them. Instead, TMNB participants should defer to  
14  
15 the HPV result provided by the CSP, as applicable. Further, in cases where the HPV  
16  
17 result from Self-TI conflicts with the CSP result or in the absence of a CSP result (as in  
18  
19 the case of TWNB samples), senior study staff felt that providing participants with a  
20  
21 result that could not be followed up with clinically could cause distress and would be  
22  
23 unethical. Only HPV positive results taken from samples as part of the CSP will warrant  
24  
25 follow up under the NHS.  
26  
27  
28  
29  
30

31 Information gained from this study will be published in peer-reviewed journals  
32  
33 and presented at national and international conferences. Prior to scientific  
34  
35 dissemination, we will engage with the PPI group in writing the lay results, results  
36  
37 dissemination strategy and final publication. The lay summary of the results will be  
38  
39 posted to the Self-TI website, participating clinic websites, and the websites of charities  
40  
41 and organisations supporting trans and non-binary people so that study participants and  
42  
43 community members may be notified of the results first at the PPI group's request.  
44  
45 Several online webinars are planned to disseminate the results and allow community  
46  
47 members to engage in a discussion with the researchers. These webinars will be  
48  
49 recorded and posted on the Self-TI website. Finally, data from this pilot study will inform  
50  
51 a larger, multi-center, international study.  
52  
53  
54  
55  
56  
57  
58  
59  
60

## DISCUSSION

The overarching goal of this pilot study is to provide important insight into the acceptability and feasibility of HPV self-sampling among transgender and gender diverse individuals for a larger study. The pilot study will provide essential data that will inform recruitment, study procedures, and sample size calculations for this larger study.

For peer review only

1  
2  
3 **Authors' contributions:** AMB and SSJ conceived, designed, and supervised the study.

4  
5 AMB and SSJ are responsible for data management. SSJ drafted the manuscript. MC  
6  
7 supervised the HPV methylation assay and provided several methodological  
8  
9 contributions. SOC maintains the study website. SSJ, SOC, and EW oversaw the  
10  
11 coordination of the PPI group. AMB, SSJ, SOC, and EW were responsible for creating  
12  
13 the study survey. All authors revised the manuscript and approved the final draft.  
14  
15

16  
17 **Acknowledgements:** We wish to thank the Self-TI participants, Fox Fisher for  
18  
19 voiceover of the instruction video and study promotion.  
20

21  
22 **Collaborators:** Self-TI Study group: Affiliated with The Caldecot Centre and CliniQ at  
23  
24 King's College Hospital NHS Trust: Ellen Adams, Kate Flanagan, Lucy Campbell, and  
25  
26 Birgit Barbini; Brighton and Howe Sexual Health Clinic: Sophie Ross and Lisa Barbour;  
27  
28 and Ambrose Kings Centre: Chloe Orkin, Kyle Ring and James Hand; Center for  
29  
30 Genomic Research at the National Cancer Institute: Amy Hutchinson and Casey  
31  
32 Dagnell. Special thanks to the members of our PPI group, Fox Fisher, and Emrah Onal.  
33  
34

35  
36 **Funding statement:** Self-TI was funded by the Intramural Research Program of the  
37  
38 Division of Cancer Epidemiology and Genetics at the National Cancer Institute,  
39  
40 Bethesda, MD, US. The PPI group was funded by the Centre for Public Engagement,  
41  
42 Queen Mary University of London.  
43

44  
45 **Sponsorship information:** Queen Mary University of London, Dr Mays Jawad,  
46  
47 Research Governance Operations Manager, Joint Research Management Office,  
48  
49 research.governance@qmul.ac.uk  
50

51  
52 **Sponsors references:** IRAS Number: 319364; Edge Number: 155220  
53  
54  
55  
56  
57  
58  
59

1  
2  
3 **Competing interest statement:** AMB is a trustee of OUTpatients, of which SOC is  
4  
5 CEO. None of the other authors have any conflicts to declare.  
6

7  
8 **Patient and public involvement:** Patients and the community were involved in the  
9  
10 design, conduct, and dissemination plans of this research. Refer to the Methods section  
11  
12 for further details.  
13  
14  
15  
16  
17  
18  
19  
20  
21  
22  
23  
24  
25  
26  
27  
28  
29  
30  
31  
32  
33  
34  
35  
36  
37  
38  
39  
40  
41  
42  
43  
44  
45  
46  
47  
48  
49  
50  
51  
52  
53  
54  
55  
56  
57  
58  
59  
60

For peer review only

## REFERENCES

1. de Martel C, Georges D, Bray F, et al. Global burden of cancer attributable to infections in 2018: a worldwide incidence analysis. *The Lancet Global health* 2019 doi: 10.1016/s2214-109x(19)30488-7 [published Online First: 2019/12/22]
2. Sasieni P, Castanon A, Cuzick J. Effectiveness of cervical screening with age: population based case-control study of prospectively recorded data. *Bmj* 2009;339:b2968. doi: 10.1136/bmj.b2968 [published Online First: 2009/07/28]
3. Stier EA, Clarke MA, Deshmukh AA, et al. International Anal Neoplasia Society's consensus guidelines for anal cancer screening. *International journal of cancer*;n/a(n/a) doi: <https://doi.org/10.1002/ijc.34850>
4. Palefsky JM, Lee JY, Jay N, et al. Treatment of Anal High-Grade Squamous Intraepithelial Lesions to Prevent Anal Cancer. *New England Journal of Medicine* 2022;386(24):2273-82. doi: 10.1056/NEJMoa2201048
5. Stewart T, Lee YA, Damiano EA. Do Transgender and Gender Diverse Individuals Receive Adequate Gynecologic Care? An Analysis of a Rural Academic Center. *Transgend Health* 2020;5(1):50-58. doi: 10.1089/trgh.2019.0037 [published Online First: 2020/04/24]
6. Clark MA, Boehmer U, Rosenthal S. Cancer screening in lesbian and bisexual women and transmen. In: Boehmer U, Elk R, eds. *Cancer and the LGBT Community*. Switzerland: Springer International Publishing 2015:83-98.
7. Peitzmeier SM, Khullar K, Reisner SL, Potter J. Pap test use is lower among female-to-male patients than non-transgender women. *American journal of preventive medicine* 2014;47(6):808-12. doi: 10.1016/j.amepre.2014.07.031 [published Online First: 2014/12/03]
8. Tabaac AR, Sutter ME, Wall CSJ, Baker KE. Gender Identity Disparities in Cancer Screening Behaviors. *American journal of preventive medicine* 2018;54(3):385-93. doi: <https://doi.org/10.1016/j.amepre.2017.11.009>
9. Peitzmeier SM, Reisner SL, Harigopal P, Potter J. Female-to-male patients have high prevalence of unsatisfactory Paps compared to non-transgender females: implications for cervical cancer screening. *J Gen Intern Med* 2014;29(5):778-84. doi: 10.1007/s11606-013-2753-1 [published Online First: 2014/01/16]
10. James SE, Herman JL, Keisling M, et al. *The Report of the 2015 U.S. Transgender Survey*. Washington, D.C.: National Center for Transgender Equality, 2016.
11. Grant JM, Mottet LA, Tanis J, et al. *Injustice at Every Turn: A Report of the National Transgender Discrimination Survey*. Washington, DC: National Center for Transgender Equality and National Gay and Lesbian Task Force, 2011.
12. Seay J, Ranck A, Weiss R, et al. Understanding Transgender Men's Experiences with and Preferences for Cervical Cancer Screening: A Rapid Assessment Survey. *LGBT Health* 2017;4(4):304-09. doi: 10.1089/lgbt.2016.0143 [published Online First: 2017/04/20]
13. Agenor M, Peitzmeier SM, Bernstein IM, et al. Perceptions of cervical cancer risk and screening among transmasculine individuals: patient and provider perspectives. *Cult Health Sex* 2016;18(10):1192-206. doi: 10.1080/13691058.2016.1177203 [published Online First: 2016/05/05]
14. Potter J, Peitzmeier SM, Bernstein I, et al. Cervical Cancer Screening for Patients on the Female-to-Male Spectrum: a Narrative Review and Guide for Clinicians. *J Gen Intern Med* 2015;30(12):1857-64. doi: 10.1007/s11606-015-3462-8 [published Online First: 2015/07/15]

15. Berner AM, Connolly DJ, Pinnell I, et al. Attitudes of transgender men and non-binary people to cervical screening: a cross-sectional mixed-methods study in the UK. *Br J Gen Pract* 2021;71(709):e614-e25. doi: 10.3399/bjgp.2020.0905 [published Online First: 20210729]
16. Brown B, Poteat T, Marg L, Galea JT. Human Papillomavirus-Related Cancer Surveillance, Prevention, and Screening Among Transgender Men and Women: Neglected Populations at High Risk. *LGBT Health* 2017;4(5):315-19. doi: 10.1089/lgbt.2016.0142 [published Online First: 2017/09/07]
17. Public Health England. Human Papillomavirus (HPV) Vaccine Coverage in England, 2008/09 to 2013/14: A review of the full six years of the three-dose schedule 2015 [Available from: [https://assets.publishing.service.gov.uk/media/5c4f232ced915d7d3953d207/HPV\\_Vaccine\\_Coverage\\_in\\_England\\_200809\\_to\\_201314.pdf](https://assets.publishing.service.gov.uk/media/5c4f232ced915d7d3953d207/HPV_Vaccine_Coverage_in_England_200809_to_201314.pdf) accessed January 16 2024.
18. National Health Service. HPV Vaccine 2023 [Available from: <https://www.nhs.uk/conditions/vaccinations/hpv-human-papillomavirus-vaccine/> accessed February 13 2024.
19. Information on HPV vaccination [Available from: <https://www.gov.uk/government/publications/hpv-vaccine-vaccination-guide-leaflet/information-on-hpv-vaccination> accessed August 8 2022.
20. Kirwan P, Hibbert M, Kall M, et al. HIV prevalence and HIV clinical outcomes of transgender and gender-diverse people in England. *HIV Medicine* 2021;22(2):131-39. doi: <https://doi.org/10.1111/hiv.12987>
21. Sun X-W, Kuhn L, Ellerbrock TV, et al. Human papillomavirus infection in women infected with the human immunodeficiency virus. *New England Journal of Medicine* 1997;337(19):1343-49.
22. Strickler HD, Burk RD, Fazzari M, et al. Natural history and possible reactivation of human papillomavirus in human immunodeficiency virus–positive women. *Journal of the National Cancer Institute* 2005;97(8):577-86.
23. Cameron JE, Hagensee ME. Human papillomavirus infection and disease in the HIV+ individual. *Aids-Associated Viral Oncogenesis* 2007:185-213.
24. Chaturvedi AK, Madeleine MM, Biggar RJ, Engels EA. Risk of Human Papillomavirus–Associated Cancers Among Persons With AIDS. *JNCI: Journal of the National Cancer Institute* 2009;101(16):1120-30. doi: 10.1093/jnci/djp205
25. Palefsky JM. Anal squamous intraepithelial lesions: relation to HIV and human papillomavirus infection. *JAIDS Journal of Acquired Immune Deficiency Syndromes* 1999;21:S42-S48.
26. Singh V, Gratzler B, Gorbach PM, et al. Transgender Women Have Higher Human Papillomavirus Prevalence Than Men Who Have Sex With Men—Two U.S. Cities, 2012–2014. *Sexually transmitted diseases* 2019;46(10)
27. de Oliveira BR, Diniz ESBV, Dos Santos KC, et al. Human Papillomavirus Positivity at 3 Anatomical Sites Among Transgender Women in Central Brazil. *Sexually transmitted diseases* 2023;50(9):567-74. doi: 10.1097/olq.0000000000001830 [published Online First: 20230521]
28. van der Sluis WB, Buncamper ME, Bouman MB, et al. Prevalence of Neovaginal High-Risk Human Papillomavirus Among Transgender Women in The Netherlands. *Sexually transmitted diseases* 2016;43(8):503-5. doi: 10.1097/olq.0000000000000476 [published Online First: 2016/07/16]

- 1
- 2
- 3
- 4
- 5
- 6 29. Uaamnuichai S, Panyakhamlerd K, Suwan A, et al. Neovaginal and Anal High-Risk Human
- 7 Papillomavirus DNA Among Thai Transgender Women in Gender Health Clinics.
- 8 *Sexually transmitted diseases* 2021;48(8):547-49. doi: 10.1097/olq.0000000000001388
- 9 30. NHS population screening: information for trans and non-binary people. [Available from:
- 10 [https://www.gov.uk/government/publications/nhs-population-screening-information-for-](https://www.gov.uk/government/publications/nhs-population-screening-information-for-transgender-people/nhs-population-screening-information-for-trans-people)
- 11 [transgender-people/nhs-population-screening-information-for-trans-people](https://www.gov.uk/government/publications/nhs-population-screening-information-for-transgender-people/nhs-population-screening-information-for-trans-people) accessed
- 12 August 8 2022.
- 13 31. Grosse A, Grosse C, Lenggenhager D, et al. Cytology of the neovagina in transgender
- 14 women and individuals with congenital or acquired absence of a natural vagina.
- 15 *Cytopathology* 2017;28(3):184-91. doi: 10.1111/cyt.12417 [published Online First:
- 16 20170220]
- 17 32. Fierz R, Ghisu GP, Fink D. Squamous Carcinoma of the Neovagina after Male-to-Female
- 18 Reconstruction Surgery: A Case Report and Review of the Literature. *Case Rep Obstet*
- 19 *Gynecol* 2019;2019:4820396. doi: 10.1155/2019/4820396 [published Online First:
- 20 20190116]
- 21 33. Arbyn M, Smith SB, Temin S, et al. Detecting cervical precancer and reaching
- 22 underscreened women by using HPV testing on self samples: updated meta-analyses.
- 23 *BMJ* 2018;363:k4823. doi: 10.1136/bmj.k4823 [published Online First: 2018/12/07]
- 24 34. Arbyn M, Verdoodt F, Snijders PJ, et al. Accuracy of human papillomavirus testing on self-
- 25 collected versus clinician-collected samples: a meta-analysis. *Lancet Oncol*
- 26 2014;15(2):172-83. doi: 10.1016/S1470-2045(13)70570-9 [published Online First:
- 27 2014/01/18]
- 28 35. McDowell M, Pardee DJ, Peitzmeier S, et al. Cervical Cancer Screening Preferences
- 29 Among Trans-Masculine Individuals: Patient-Collected Human Papillomavirus Vaginal
- 30 Swabs Versus Provider-Administered Pap Tests. *LGBT Health* 2017;4(4):252-59. doi:
- 31 10.1089/lgbt.2016.0187 [published Online First: 2017/07/01]
- 32 36. Welsh EF, Andrus EC, Sandler CB, et al. Cervicovaginal and anal self-sampling for HPV
- 33 testing in a transgender and gender diverse population assigned female at birth: comfort,
- 34 difficulty, and willingness to use. *medRxiv* 2023 doi: 10.1101/2023.08.15.23294132
- 35 [published Online First: 20230816]
- 36 37. Peitzmeier SM, Agenor M, Bernstein IM, et al. "It Can Promote an Existential Crisis":
- 37 Factors Influencing Pap Test Acceptability and Utilization Among Transmasculine
- 38 Individuals. *Qual Health Res* 2017;27(14):2138-49. doi: 10.1177/1049732317725513
- 39 [published Online First: 2017/08/25]
- 40 38. Reisner SL, Deutsch MB, Peitzmeier SM, et al. Comparing self- and provider-collected
- 41 swabbing for HPV DNA testing in female-to-male transgender adult patients: a mixed-
- 42 methods biobehavioral study protocol. *BMC Infect Dis* 2017;17(1):444. doi:
- 43 10.1186/s12879-017-2539-x [published Online First: 2017/06/25]
- 44 39. Reisner SL, Deutsch MB, Peitzmeier SM, et al. Test performance and acceptability of self-
- 45 versus provider-collected swabs for high-risk HPV DNA testing in female-to-male trans
- 46 masculine patients. *PLoS One* 2018;13(3):e0190172. doi:
- 47 10.1371/journal.pone.0190172 [published Online First: 2018/03/15]
- 48 40. Nyitray AG, Nitkowski J, McAuliffe TL, et al. Home-based self-sampling vs clinician sampling
- 49 for anal precancer screening: The Prevent Anal Cancer Self-Swab Study. *International*
- 50 *journal of cancer* 2023;153(4):843-53. doi: <https://doi.org/10.1002/ijc.34553>
- 51 41. SPIRIT 2013 Statement: Defining Standard Protocol Items for Clinical Trials. *Annals of*
- 52 *Internal Medicine* 2013;158(3):200-07. doi: 10.7326/0003-4819-158-3-201302050-00583
- 53 %m 23295957
- 54
- 55
- 56
- 57
- 58
- 59
- 60



1  
2  
3  
4  
5  
6  
7  
8  
9  
10  
11  
12  
13  
14  
15  
16  
17  
18  
19  
20  
21  
22  
23  
24  
25  
26  
27  
28  
29  
30  
31  
32  
33  
34  
35  
36  
37  
38  
39  
40  
41  
42  
43  
44  
45  
46  
47  
48  
49  
50  
51  
52  
53  
54  
55  
56  
57  
58  
59  
60

42. Ben-Batalla I, Vargas-Delgado ME, Meier L, Loges S. Sexual dimorphism in solid and hematological malignancies. *Semin Immunopathol* 2019;41(2):251-63. doi: 10.1007/s00281-018-0724-7 [published Online First: 2018/10/27]

For peer review only

Figure 1. Study Flow

**Transmasculine and non-binary people with a cervix**

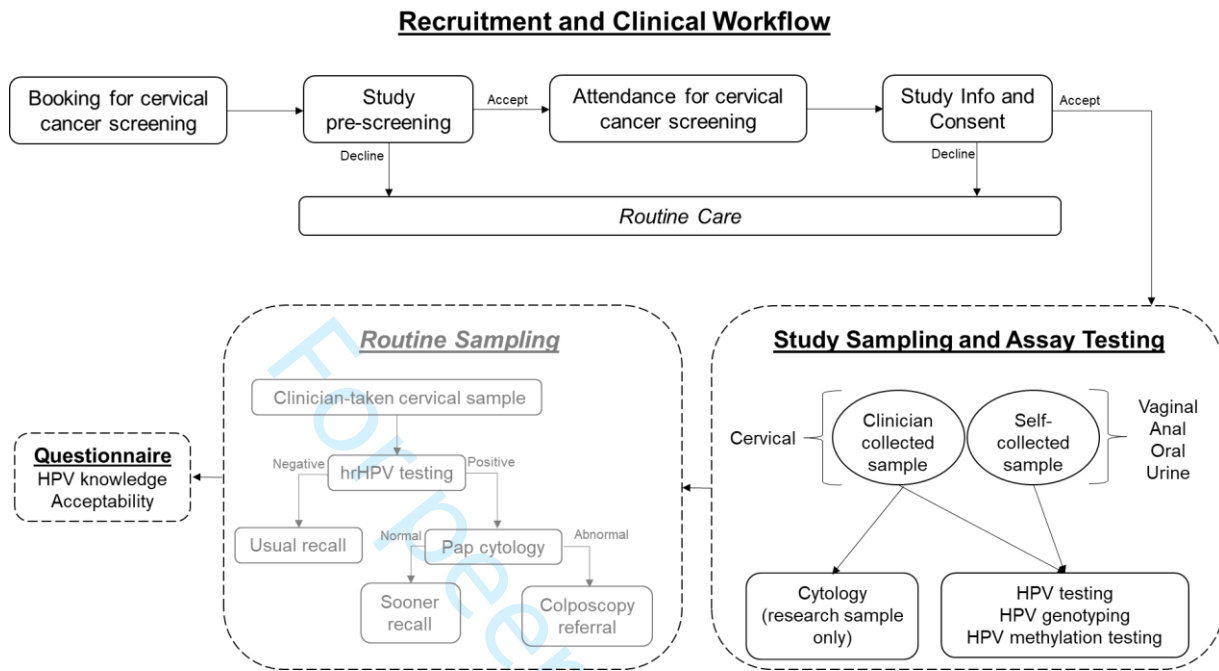

**Trans women and non-binary people assigned male at birth**

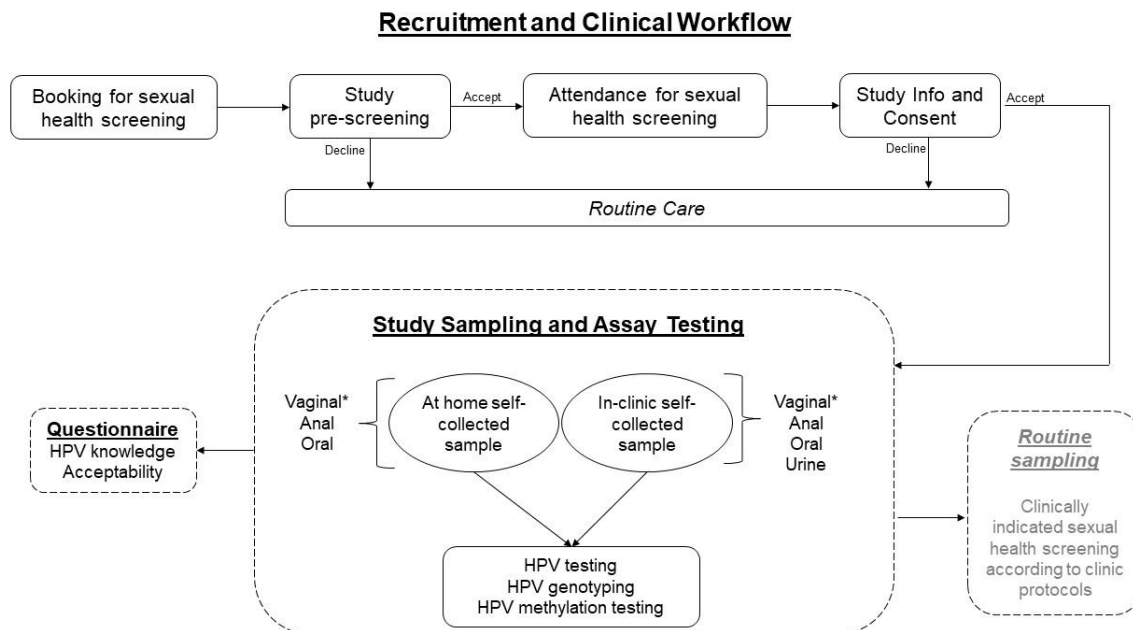

\*Participants will only collect vaginal samples if they have undergone vaginoplasty

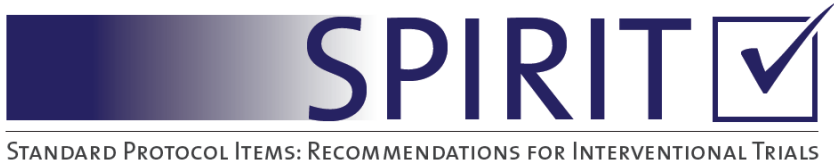

1  
2  
3  
4  
5  
6  
7  
8  
9  
10  
11  
12  
13  
14  
15  
16  
17  
18  
19  
20  
21  
22  
23  
24  
25  
26  
27  
28  
29  
30  
31  
32  
33  
34  
35  
36  
37  
38  
39  
40  
41  
42  
43  
44  
45  
46

SPIRIT 2013 Checklist: Recommended items to address in a clinical trial protocol and related documents\*

| Section/item                      | Item No | Description                                                                                                                                                                                                                                                                              | Addressed on page number |
|-----------------------------------|---------|------------------------------------------------------------------------------------------------------------------------------------------------------------------------------------------------------------------------------------------------------------------------------------------|--------------------------|
| <b>Administrative information</b> |         |                                                                                                                                                                                                                                                                                          |                          |
| Title                             | 1       | Descriptive title identifying the study design, population, interventions, and, if applicable, trial acronym                                                                                                                                                                             | 1                        |
| Trial registration                | 2a      | Trial identifier and registry name. If not yet registered, name of intended registry                                                                                                                                                                                                     | 3 and 6                  |
|                                   | 2b      | All items from the World Health Organization Trial Registration Data Set                                                                                                                                                                                                                 |                          |
| Protocol version                  | 3       | Date and version identifier                                                                                                                                                                                                                                                              | 7                        |
| Funding                           | 4       | Sources and types of financial, material, and other support                                                                                                                                                                                                                              | 18                       |
| Roles and responsibilities        | 5a      | Names, affiliations, and roles of protocol contributors                                                                                                                                                                                                                                  | 18                       |
|                                   | 5b      | Name and contact information for the trial sponsor                                                                                                                                                                                                                                       | 18                       |
|                                   | 5c      | Role of study sponsor and funders, if any, in study design; collection, management, analysis, and interpretation of data; writing of the report; and the decision to submit the report for publication, including whether they will have ultimate authority over any of these activities | N/A                      |
|                                   | 5d      | Composition, roles, and responsibilities of the coordinating centre, steering committee, endpoint adjudication committee, data management team, and other individuals or groups overseeing the trial, if applicable (see Item 21a for data monitoring committee)                         | N/A                      |

1 **Introduction**

2

3 Background and rationale 6a Description of research question and justification for undertaking the trial, including summary of relevant studies (published and unpublished) examining benefits and harms for each intervention 4-6

4

5

6 6b Explanation for choice of comparators N/A

7

8 Objectives 7 Specific objectives or hypotheses 6

9

10 Trial design 8 Description of trial design including type of trial (eg, parallel group, crossover, factorial, single group), allocation ratio, and framework (eg, superiority, equivalence, noninferiority, exploratory) 6

11

12

13

14 **Methods: Participants, interventions, and outcomes**

15

16 Study setting 9 Description of study settings (eg, community clinic, academic hospital) and list of countries where data will be collected. Reference to where list of study sites can be obtained 6-8

17

18

19 Eligibility criteria 10 Inclusion and exclusion criteria for participants. If applicable, eligibility criteria for study centres and individuals who will perform the interventions (eg, surgeons, psychotherapists) 8

20

21

22

23 Interventions 11a Interventions for each group with sufficient detail to allow replication, including how and when they will be administered 8-12

24

25

26 11b Criteria for discontinuing or modifying allocated interventions for a given trial participant (eg, drug dose change in response to harms, participant request, or improving/worsening disease) N/A

27

28

29 11c Strategies to improve adherence to intervention protocols, and any procedures for monitoring adherence (eg, drug tablet return, laboratory tests) 12

30

31

32 11d Relevant concomitant care and interventions that are permitted or prohibited during the trial N/A

33

34 Outcomes 12 Primary, secondary, and other outcomes, including the specific measurement variable (eg, systolic blood pressure), analysis metric (eg, change from baseline, final value, time to event), method of aggregation (eg, median, proportion), and time point for each outcome. Explanation of the clinical relevance of chosen efficacy and harm outcomes is strongly recommended 12-13

35

36

37

38

39

40 Participant timeline 13 Time schedule of enrolment, interventions (including any run-ins and washouts), assessments, and visits for participants. A schematic diagram is highly recommended (see Figure) 8-12, Table 1

41

42

43

44

45

46

|    |                                                                     |     |                                                                                                                                                                                                                                                                                                                                                                                                              |                     |
|----|---------------------------------------------------------------------|-----|--------------------------------------------------------------------------------------------------------------------------------------------------------------------------------------------------------------------------------------------------------------------------------------------------------------------------------------------------------------------------------------------------------------|---------------------|
| 1  | Sample size                                                         | 14  | Estimated number of participants needed to achieve study objectives and how it was determined, including clinical and statistical assumptions supporting any sample size calculations                                                                                                                                                                                                                        | <u>7</u>            |
| 2  |                                                                     |     |                                                                                                                                                                                                                                                                                                                                                                                                              |                     |
| 3  |                                                                     |     |                                                                                                                                                                                                                                                                                                                                                                                                              |                     |
| 4  | Recruitment                                                         | 15  | Strategies for achieving adequate participant enrolment to reach target sample size                                                                                                                                                                                                                                                                                                                          | <u>7, 8, and 12</u> |
| 5  |                                                                     |     |                                                                                                                                                                                                                                                                                                                                                                                                              |                     |
| 6  |                                                                     |     |                                                                                                                                                                                                                                                                                                                                                                                                              |                     |
| 7  | <b>Methods: Assignment of interventions (for controlled trials)</b> |     |                                                                                                                                                                                                                                                                                                                                                                                                              |                     |
| 8  | Allocation:                                                         |     |                                                                                                                                                                                                                                                                                                                                                                                                              |                     |
| 9  |                                                                     |     |                                                                                                                                                                                                                                                                                                                                                                                                              |                     |
| 10 | Sequence generation                                                 | 16a | Method of generating the allocation sequence (eg, computer-generated random numbers), and list of any factors for stratification. To reduce predictability of a random sequence, details of any planned restriction (eg, blocking) should be provided in a separate document that is unavailable to those who enrol participants or assign interventions                                                     | <u>N/A</u>          |
| 11 |                                                                     |     |                                                                                                                                                                                                                                                                                                                                                                                                              |                     |
| 12 |                                                                     |     |                                                                                                                                                                                                                                                                                                                                                                                                              |                     |
| 13 |                                                                     |     |                                                                                                                                                                                                                                                                                                                                                                                                              |                     |
| 14 |                                                                     |     |                                                                                                                                                                                                                                                                                                                                                                                                              |                     |
| 15 |                                                                     |     |                                                                                                                                                                                                                                                                                                                                                                                                              |                     |
| 16 | Allocation concealment mechanism                                    | 16b | Mechanism of implementing the allocation sequence (eg, central telephone; sequentially numbered, opaque, sealed envelopes), describing any steps to conceal the sequence until interventions are assigned                                                                                                                                                                                                    | <u>N/A</u>          |
| 17 |                                                                     |     |                                                                                                                                                                                                                                                                                                                                                                                                              |                     |
| 18 |                                                                     |     |                                                                                                                                                                                                                                                                                                                                                                                                              |                     |
| 19 |                                                                     |     |                                                                                                                                                                                                                                                                                                                                                                                                              |                     |
| 20 |                                                                     |     |                                                                                                                                                                                                                                                                                                                                                                                                              |                     |
| 21 | Implementation                                                      | 16c | Who will generate the allocation sequence, who will enrol participants, and who will assign participants to interventions                                                                                                                                                                                                                                                                                    | <u>N/A</u>          |
| 22 |                                                                     |     |                                                                                                                                                                                                                                                                                                                                                                                                              |                     |
| 23 |                                                                     |     |                                                                                                                                                                                                                                                                                                                                                                                                              |                     |
| 24 | Blinding (masking)                                                  | 17a | Who will be blinded after assignment to interventions (eg, trial participants, care providers, outcome assessors, data analysts), and how                                                                                                                                                                                                                                                                    | <u>N/A</u>          |
| 25 |                                                                     |     |                                                                                                                                                                                                                                                                                                                                                                                                              |                     |
| 26 |                                                                     |     |                                                                                                                                                                                                                                                                                                                                                                                                              |                     |
| 27 |                                                                     | 17b | If blinded, circumstances under which unblinding is permissible, and procedure for revealing a participant's allocated intervention during the trial                                                                                                                                                                                                                                                         | <u>N/A</u>          |
| 28 |                                                                     |     |                                                                                                                                                                                                                                                                                                                                                                                                              |                     |
| 29 |                                                                     |     |                                                                                                                                                                                                                                                                                                                                                                                                              |                     |
| 30 |                                                                     |     |                                                                                                                                                                                                                                                                                                                                                                                                              |                     |
| 31 | <b>Methods: Data collection, management, and analysis</b>           |     |                                                                                                                                                                                                                                                                                                                                                                                                              |                     |
| 32 |                                                                     |     |                                                                                                                                                                                                                                                                                                                                                                                                              |                     |
| 33 | Data collection methods                                             | 18a | Plans for assessment and collection of outcome, baseline, and other trial data, including any related processes to promote data quality (eg, duplicate measurements, training of assessors) and a description of study instruments (eg, questionnaires, laboratory tests) along with their reliability and validity, if known. Reference to where data collection forms can be found, if not in the protocol | <u>9-12</u>         |
| 34 |                                                                     |     |                                                                                                                                                                                                                                                                                                                                                                                                              |                     |
| 35 |                                                                     |     |                                                                                                                                                                                                                                                                                                                                                                                                              |                     |
| 36 |                                                                     |     |                                                                                                                                                                                                                                                                                                                                                                                                              |                     |
| 37 |                                                                     |     |                                                                                                                                                                                                                                                                                                                                                                                                              |                     |
| 38 |                                                                     |     |                                                                                                                                                                                                                                                                                                                                                                                                              |                     |
| 39 |                                                                     | 18b | Plans to promote participant retention and complete follow-up, including list of any outcome data to be collected for participants who discontinue or deviate from intervention protocols                                                                                                                                                                                                                    | <u>11</u>           |
| 40 |                                                                     |     |                                                                                                                                                                                                                                                                                                                                                                                                              |                     |
| 41 |                                                                     |     |                                                                                                                                                                                                                                                                                                                                                                                                              |                     |
| 42 |                                                                     |     |                                                                                                                                                                                                                                                                                                                                                                                                              |                     |
| 43 |                                                                     |     |                                                                                                                                                                                                                                                                                                                                                                                                              |                     |
| 44 |                                                                     |     |                                                                                                                                                                                                                                                                                                                                                                                                              |                     |
| 45 |                                                                     |     |                                                                                                                                                                                                                                                                                                                                                                                                              |                     |
| 46 |                                                                     |     |                                                                                                                                                                                                                                                                                                                                                                                                              |                     |

|    |                                 |     |                                                                                                                                                                                                                                                                                                                                       |              |
|----|---------------------------------|-----|---------------------------------------------------------------------------------------------------------------------------------------------------------------------------------------------------------------------------------------------------------------------------------------------------------------------------------------|--------------|
| 1  | Data management                 | 19  | Plans for data entry, coding, security, and storage, including any related processes to promote data quality (eg, double data entry; range checks for data values). Reference to where details of data management procedures can be found, if not in the protocol                                                                     | <u>13</u>    |
| 2  |                                 |     |                                                                                                                                                                                                                                                                                                                                       |              |
| 3  |                                 |     |                                                                                                                                                                                                                                                                                                                                       |              |
| 4  |                                 |     |                                                                                                                                                                                                                                                                                                                                       |              |
| 5  | Statistical methods             | 20a | Statistical methods for analysing primary and secondary outcomes. Reference to where other details of the statistical analysis plan can be found, if not in the protocol                                                                                                                                                              | <u>13-14</u> |
| 6  |                                 |     |                                                                                                                                                                                                                                                                                                                                       |              |
| 7  |                                 |     |                                                                                                                                                                                                                                                                                                                                       |              |
| 8  |                                 | 20b | Methods for any additional analyses (eg, subgroup and adjusted analyses)                                                                                                                                                                                                                                                              | <u>N/A</u>   |
| 9  |                                 |     |                                                                                                                                                                                                                                                                                                                                       |              |
| 10 |                                 | 20c | Definition of analysis population relating to protocol non-adherence (eg, as randomised analysis), and any statistical methods to handle missing data (eg, multiple imputation)                                                                                                                                                       | <u>N/A</u>   |
| 11 |                                 |     |                                                                                                                                                                                                                                                                                                                                       |              |
| 12 |                                 |     |                                                                                                                                                                                                                                                                                                                                       |              |
| 13 |                                 |     |                                                                                                                                                                                                                                                                                                                                       |              |
| 14 | <b>Methods: Monitoring</b>      |     |                                                                                                                                                                                                                                                                                                                                       |              |
| 15 |                                 |     |                                                                                                                                                                                                                                                                                                                                       |              |
| 16 | Data monitoring                 | 21a | Composition of data monitoring committee (DMC); summary of its role and reporting structure; statement of whether it is independent from the sponsor and competing interests; and reference to where further details about its charter can be found, if not in the protocol. Alternatively, an explanation of why a DMC is not needed | <u>13</u>    |
| 17 |                                 |     |                                                                                                                                                                                                                                                                                                                                       |              |
| 18 |                                 |     |                                                                                                                                                                                                                                                                                                                                       |              |
| 19 |                                 |     |                                                                                                                                                                                                                                                                                                                                       |              |
| 20 |                                 |     |                                                                                                                                                                                                                                                                                                                                       |              |
| 21 |                                 |     |                                                                                                                                                                                                                                                                                                                                       |              |
| 22 |                                 | 21b | Description of any interim analyses and stopping guidelines, including who will have access to these interim results and make the final decision to terminate the trial                                                                                                                                                               | <u>N/A</u>   |
| 23 |                                 |     |                                                                                                                                                                                                                                                                                                                                       |              |
| 24 |                                 |     |                                                                                                                                                                                                                                                                                                                                       |              |
| 25 | Harms                           | 22  | Plans for collecting, assessing, reporting, and managing solicited and spontaneously reported adverse events and other unintended effects of trial interventions or trial conduct                                                                                                                                                     | <u>13</u>    |
| 26 |                                 |     |                                                                                                                                                                                                                                                                                                                                       |              |
| 27 |                                 |     |                                                                                                                                                                                                                                                                                                                                       |              |
| 28 | Auditing                        | 23  | Frequency and procedures for auditing trial conduct, if any, and whether the process will be independent from investigators and the sponsor                                                                                                                                                                                           | <u>13</u>    |
| 29 |                                 |     |                                                                                                                                                                                                                                                                                                                                       |              |
| 30 |                                 |     |                                                                                                                                                                                                                                                                                                                                       |              |
| 31 |                                 |     |                                                                                                                                                                                                                                                                                                                                       |              |
| 32 | <b>Ethics and dissemination</b> |     |                                                                                                                                                                                                                                                                                                                                       |              |
| 33 |                                 |     |                                                                                                                                                                                                                                                                                                                                       |              |
| 34 | Research ethics approval        | 24  | Plans for seeking research ethics committee/institutional review board (REC/IRB) approval                                                                                                                                                                                                                                             | <u>7</u>     |
| 35 |                                 |     |                                                                                                                                                                                                                                                                                                                                       |              |
| 36 |                                 |     |                                                                                                                                                                                                                                                                                                                                       |              |
| 37 | Protocol amendments             | 25  | Plans for communicating important protocol modifications (eg, changes to eligibility criteria, outcomes, analyses) to relevant parties (eg, investigators, REC/IRBs, trial participants, trial registries, journals, regulators)                                                                                                      | <u>7</u>     |
| 38 |                                 |     |                                                                                                                                                                                                                                                                                                                                       |              |
| 39 |                                 |     |                                                                                                                                                                                                                                                                                                                                       |              |
| 40 |                                 |     |                                                                                                                                                                                                                                                                                                                                       |              |
| 41 |                                 |     |                                                                                                                                                                                                                                                                                                                                       |              |
| 42 |                                 |     |                                                                                                                                                                                                                                                                                                                                       |              |

|    |                               |     |                                                                                                                                                                                                                                                                                     |                          |
|----|-------------------------------|-----|-------------------------------------------------------------------------------------------------------------------------------------------------------------------------------------------------------------------------------------------------------------------------------------|--------------------------|
| 1  | Consent or assent             | 26a | Who will obtain informed consent or assent from potential trial participants or authorised surrogates, and how (see Item 32)                                                                                                                                                        | <u>7</u>                 |
| 2  |                               |     |                                                                                                                                                                                                                                                                                     |                          |
| 3  |                               |     |                                                                                                                                                                                                                                                                                     |                          |
| 4  |                               | 26b | Additional consent provisions for collection and use of participant data and biological specimens in ancillary studies, if applicable                                                                                                                                               | <u>7</u>                 |
| 5  |                               |     |                                                                                                                                                                                                                                                                                     |                          |
| 6  |                               |     |                                                                                                                                                                                                                                                                                     |                          |
| 7  | Confidentiality               | 27  | How personal information about potential and enrolled participants will be collected, shared, and maintained in order to protect confidentiality before, during, and after the trial                                                                                                | <u>12</u>                |
| 8  |                               |     |                                                                                                                                                                                                                                                                                     |                          |
| 9  |                               |     |                                                                                                                                                                                                                                                                                     |                          |
| 10 | Declaration of interests      | 28  | Financial and other competing interests for principal investigators for the overall trial and each study site                                                                                                                                                                       | <u>17</u>                |
| 11 |                               |     |                                                                                                                                                                                                                                                                                     |                          |
| 12 |                               |     |                                                                                                                                                                                                                                                                                     |                          |
| 13 | Access to data                | 29  | Statement of who will have access to the final trial dataset, and disclosure of contractual agreements that limit such access for investigators                                                                                                                                     | <u>13</u>                |
| 14 |                               |     |                                                                                                                                                                                                                                                                                     |                          |
| 15 |                               |     |                                                                                                                                                                                                                                                                                     |                          |
| 16 |                               |     |                                                                                                                                                                                                                                                                                     |                          |
| 17 | Ancillary and post-trial care | 30  | Provisions, if any, for ancillary and post-trial care, and for compensation to those who suffer harm from trial participation                                                                                                                                                       | <u>N/A</u>               |
| 18 |                               |     |                                                                                                                                                                                                                                                                                     |                          |
| 19 |                               |     |                                                                                                                                                                                                                                                                                     |                          |
| 20 | Dissemination policy          | 31a | Plans for investigators and sponsor to communicate trial results to participants, healthcare professionals, the public, and other relevant groups (eg, via publication, reporting in results databases, or other data sharing arrangements), including any publication restrictions | <u>15-16</u>             |
| 21 |                               |     |                                                                                                                                                                                                                                                                                     |                          |
| 22 |                               |     |                                                                                                                                                                                                                                                                                     |                          |
| 23 |                               |     |                                                                                                                                                                                                                                                                                     |                          |
| 24 |                               | 31b | Authorship eligibility guidelines and any intended use of professional writers                                                                                                                                                                                                      | <u>N/A</u>               |
| 25 |                               |     |                                                                                                                                                                                                                                                                                     |                          |
| 26 |                               | 31c | Plans, if any, for granting public access to the full protocol, participant-level dataset, and statistical code                                                                                                                                                                     | <u>N/A</u>               |
| 27 |                               |     |                                                                                                                                                                                                                                                                                     |                          |
| 28 |                               |     |                                                                                                                                                                                                                                                                                     |                          |
| 29 | <b>Appendices</b>             |     |                                                                                                                                                                                                                                                                                     |                          |
| 30 |                               |     |                                                                                                                                                                                                                                                                                     |                          |
| 31 | Informed consent materials    | 32  | Model consent form and other related documentation given to participants and authorised surrogates                                                                                                                                                                                  | <u>N/A</u>               |
| 32 |                               |     |                                                                                                                                                                                                                                                                                     |                          |
| 33 |                               |     |                                                                                                                                                                                                                                                                                     |                          |
| 34 | Biological specimens          | 33  | Plans for collection, laboratory evaluation, and storage of biological specimens for genetic or molecular analysis in the current trial and for future use in ancillary studies, if applicable                                                                                      | <u>12-13 and Table 2</u> |
| 35 |                               |     |                                                                                                                                                                                                                                                                                     |                          |
| 36 |                               |     |                                                                                                                                                                                                                                                                                     |                          |

\*It is strongly recommended that this checklist be read in conjunction with the SPIRIT 2013 Explanation & Elaboration for important clarification on the items. Amendments to the protocol should be tracked and dated. The SPIRIT checklist is copyrighted by the SPIRIT Group under the Creative Commons "[Attribution-NonCommercial-NoDerivs 3.0 Unported](https://creativecommons.org/licenses/by-nc-nd/3.0/)" license.

# BMJ Open

## Rationale and design of The Self-TI Study protocol: a cross-sectional human papillomavirus self-testing pilot study among transgender adults in England

|                                 |                                                                                                                                                                                                                                                                                                         |
|---------------------------------|---------------------------------------------------------------------------------------------------------------------------------------------------------------------------------------------------------------------------------------------------------------------------------------------------------|
| Journal:                        | <i>BMJ Open</i>                                                                                                                                                                                                                                                                                         |
| Manuscript ID                   | bmjopen-2024-086099.R1                                                                                                                                                                                                                                                                                  |
| Article Type:                   | Protocol                                                                                                                                                                                                                                                                                                |
| Date Submitted by the Author:   | 07-Jun-2024                                                                                                                                                                                                                                                                                             |
| Complete List of Authors:       | Jackson, Sarah ; National Cancer Institute<br>O'Callaghan, Stewart; OUTPatients<br>Ward, Elanore; Cambridge University Hospitals NHS Foundation Trust<br>Orkin, Chloe; Queen Mary University of London<br>Clarke, Megan; National Cancer Institute<br>Bernier, Alison ; Queen Mary University of London |
| <b>Primary Subject Heading</b>: | Sexual health                                                                                                                                                                                                                                                                                           |
| Secondary Subject Heading:      | Infectious diseases, Oncology, Obstetrics and gynaecology, Public health                                                                                                                                                                                                                                |
| Keywords:                       | Human Papillomavirus Viruses, Transgender Persons, Uterine Cervical Neoplasms, Health Equity                                                                                                                                                                                                            |
|                                 |                                                                                                                                                                                                                                                                                                         |

SCHOLARONE™  
Manuscripts



1  
2  
3 **Rationale and design of The Self-TI Study protocol: a cross-sectional human**  
4 **papillomavirus self-testing pilot study among transgender adults in England**  
5  
6

7  
8 Sarah S. Jackson,<sup>1\*</sup> Stewart O'Callaghan,<sup>2</sup> Elanore Ward,<sup>3</sup> Chloe Orkin,<sup>4</sup> Megan A.  
9 Clarke,<sup>1</sup> and Alison May Berner<sup>5</sup>  
10

11  
12  
13  
14 **Affiliations:**

15 <sup>1</sup>Division of Cancer Epidemiology and Genetics, National Cancer Institute, Rockville, MD, USA

16 <sup>2</sup>OUTpatients, London, England

17 <sup>3</sup>Cambridge University Hospitals NHS Foundation Trust, Cambridge, England

18 <sup>4</sup>Blizard Institute, Faculty of Medicine and Dentistry, Queen Mary University of London, London,  
19 England

20 <sup>5</sup>Barts Cancer Institute, Queen Mary University of London, London, England  
21  
22  
23  
24  
25  
26

27 \*Corresponding author:

28 Sarah S. Jackson, PhD, MPH

29 Infections and Immunoepidemiology Branch

30 Division of Cancer Epidemiology and Genetics

31 National Cancer Institute

32 Rockville, MD

33 Sarah.jackson@nih.gov  
34  
35  
36  
37  
38  
39  
40  
41  
42  
43  
44  
45  
46  
47  
48  
49  
50

51 **Word count:** Abstract: 334; Text: 3,592; Tables: 2; Figures: 1; Supplemental files: 1  
52

53 **Key words:** human papillomavirus, HPV, transgender and non-binary, cancer  
54 screening, cervical cancer, anal cancer  
55  
56  
57  
58

## Abstract

**Introduction:** Persistent infection with high-risk human papillomavirus (HPV) is the causal agent of several cancers including cervical, anal, and oropharyngeal cancer. Transgender men and transmasculine non-binary (TMNB) people with a cervix are much less likely to undergo cervical cancer screening than cisgender women.

Transgender women and transfeminine non-binary (TWNB) people assigned male at birth may be at increased risk of HPV. Both TMNB and TWNB people face many barriers to HPV testing including medical mistrust due to stigma and discrimination.

**Methods and analysis:** The Self-TI Study (Self-TI) is a pilot study designed to measure acceptability and feasibility of HPV self-testing among transgender and non-binary people in England. TMNB people aged 25–65, with at least one year of testosterone and TWNB people, aged 18 and over are eligible to participate. Participants self-collect up to four samples: an oral rinse, a first void urine sample, a vaginal swab (if applicable), and an anal swab. TMNB participants are asked to have an additional clinician-collected cervical swab taken following their routine Cervical Screening Programme sample. TWNB are asked to take a self-collection kit to perform additional self-collection at home and mail the samples back to the clinic. Acceptability is assessed by a self-administered online survey and feasibility is measured as the proportion of samples returned in the clinic and from home.

**Ethics and dissemination:** Self-TI received ethical approval from the Regulatory Ethics Committee of Wales 4 (Wales REC 4) and Ethical Review Panel within the Division of Cancer Epidemiology and Genetics at the US National Cancer Institute. Self-TI was co-produced by members of the transgender and non-binary community, who

1  
2  
3 served as authors, collaborators, and members of the patient and public involvement  
4 (PPI) group. Results of this study will be shared with the community prior to being  
5  
6 published in peer-reviewed journals and the PPI group will help to design the results  
7  
8 dissemination strategy. The evidence generated from this pilot study could be used to  
9  
10 inform a larger, international study of HPV self-testing in the transgender and non-binary  
11  
12 community.  
13  
14  
15

16  
17  
18 **Trial registration number:** NCT05883111  
19

### 20 21 **Strengths and Limitations**

- 22  
23  
24 • The pilot study addresses the lack of evidence around acceptability of human  
25  
26 papillomavirus (HPV) self-sampling in transgender and non-binary people and  
27  
28 was co-designed with community members.  
29
- 30  
31 • This pilot study collects samples from four body sites including an oral rinse, a  
32  
33 urine sample, a vaginal swab, and an anal swab to assess correlation between  
34  
35 samples.  
36
- 37  
38 • This pilot study examines the concordance between self-collected and clinician-  
39  
40 collected samples.  
41
- 42  
43 • This pilot study offers participants an at-home collection kit to assess the  
44  
45 feasibility of HPV testing at home.  
46
- 47  
48 • The generalizability of study findings is limited due the convenience sampling of  
49  
50 participants.  
51  
52  
53  
54  
55  
56  
57  
58  
59  
60

## 1 INTRODUCTION

2 Persistent infection with one of 12 high-risk human papillomavirus (HPV) genotypes is  
3 the causative agent of several cancers including cervical, anogenital, and  
4 oropharyngeal.<sup>1</sup> The widespread implementation of cervical cancer screening with Pap  
5 cytology or HPV testing, combined with HPV vaccination, has greatly reduced cervical  
6 cancer incidence and mortality.<sup>2</sup> Consensus guidelines for anal cancer screening now  
7 include transgender women.<sup>3 4</sup>

8 Transgender men and transmasculine non-binary (TMNB) adults (those who  
9 were registered female at birth and have a masculine or non-binary gender identity) are  
10 less likely to have ever undergone cervical cancer screening than cisgender women.<sup>5 6</sup>  
11 As many as one third of TMNB adults are not up-to-date with recommended screening  
12 guidelines.<sup>7 8</sup> Among those screened, TMNB patients are eight times more likely than  
13 cisgender women to have an inadequate Pap where the test cannot be evaluated for a  
14 variety of reasons such as lack of sufficient cellularity or bleeding resulting from  
15 testosterone induced cervical and vaginal atrophy.<sup>9</sup> TMNB adults face many additional  
16 barriers to cervical cancer screening than cisgender people, including an increased  
17 likelihood of discrimination in medical settings.<sup>10-12</sup> During gynecologic exams, TMNB  
18 patients may experience gender dysphoria (distress associated with the incongruence  
19 between gender identity and sex registered at birth) due to the focus on genitalia and  
20 the gendered nature of cervical cancer screening, such as feminine waiting rooms and  
21 expectations of gender conformity.<sup>13-15</sup> Clinicians may also erroneously believe that  
22 TMNB are not a risk for HPV due to incorrect assumptions about TMNB anatomy and

1  
2  
3 23 sexual practices, and are less likely to recommend screening.<sup>14</sup> Further, TMNB patients  
4  
5 24 may be less likely to be vaccinated against HPV than cisgender women.<sup>16</sup>  
6  
7

8 25 Transgender women and transfeminine non-binary (TWNB) adults (those who  
9  
10 26 were registered male at birth and have a female or non-binary gender identity) may be  
11  
12 27 at increased risk of HPV infection compared to cisgender individuals. England began a  
13  
14 28 national HPV immunisation programme for adolescent girls with the bivalent HPV  
15  
16 29 vaccine in 2008, switching to the quadrivalent in 2012 and the nonavalent in 2021.<sup>17 18</sup>  
17  
18  
19 30 The UK implemented a gender-neutral vaccination program in 2019 with a catch-up  
20  
21 31 programme for people up to the age of 45 years who are considered high risk for HPV  
22  
23 32 (e.g., men who have sex with men).<sup>19</sup> Though transgender and non-binary people may  
24  
25 33 be eligible for vaccination through the catch-up programme, barriers to healthcare and  
26  
27 34 lack of perceived risk means that many TWNB adults may still be unvaccinated.<sup>20</sup>  
28  
29 35 Additionally, co-infection with HIV, which may be elevated among TWNB adults  
30  
31 36 compared to the general population,<sup>21</sup> increases the risk of persistent HPV infection<sup>22-24</sup>  
32  
33 37 and HPV associated cancers.<sup>25 26</sup> One small US study reported a study HPV prevalence  
34  
35 38 of 89% in anal and 9% in oral specimens from TWNB adults.<sup>27</sup> A Brazilian study of 268  
36  
37 39 transgender women reported a study prevalence to be 77% in anal, 34% in genital, and  
38  
39 40 11% oral specimens.<sup>28</sup> Studies from both The Netherlands and Thailand estimate a  
40  
41 41 20% prevalence of neovaginal high-risk HPV, though these two studies had a high  
42  
43 42 proportion of invalid HPV results, suggesting the true prevalence may be higher.<sup>29 30</sup>  
44  
45 43 The oncogenic potential of persistent high-risk HPV infection in the vagina of TWNB is  
46  
47 44 poorly understood and current guidelines do not recommend screening for this  
48  
49  
50  
51  
52  
53  
54  
55  
56  
57  
58  
59  
60

1  
2  
3 45 population.<sup>31</sup> Both low- and high-grade squamous intraepithelial lesions have been  
4  
5 46 reported in the vagina of TWNB adults but incidence data is lacking.<sup>32 33</sup>  
6  
7

8 47 Prior research conducted in cisgender women (largely from high-income  
9  
10 48 countries) has shown that self-sampling for HPV with PCR-based assays has  
11  
12 49 comparable performance to clinician-collected samples for the detection of cervical  
13  
14 50 HPV.<sup>34 35</sup> Limited research suggests that most TMNB patients may prefer HPV testing  
15  
16 51 by self-collection,<sup>36 37</sup> though patients have expressed concern about the lack of  
17  
18 52 evidence-based guidelines specific to TMNB to inform their preference.<sup>36 38</sup> Indeed, only  
19  
20 53 one small study<sup>39</sup> has compared the performance of clinician- and self-collected  
21  
22 54 samples in TMNB, showing good concordance; however more research is needed to  
23  
24 55 assess whether this is an acceptable approach for cervical screening in TMNB. Reisner  
25  
26 56 *et al.*<sup>40</sup> found a study HPV prevalence of 16% among 130 TM participants and that HPV  
27  
28 57 testing by self-sample showed good concordance with clinician-collected samples.  
29  
30  
31 58 Similarly, one US study that included TWNB adults found that people were more likely  
32  
33 59 to engage in anal cancer screening with an at-home self-collection kit than attend a  
34  
35 60 clinician-collected screening appointment.<sup>41</sup>  
36  
37  
38  
39

40 61 We present the protocol for Self-TI, a pilot study whose objective is to assess  
41  
42 62 the feasibility and acceptability of HPV self-testing at four body sites among TMNB and  
43  
44 63 TWNB adults.  
45

## 46 64 **METHODS AND ANALYSIS**

### 47 65 **Study design and setting**

48  
49 66 The Self-TI Study (Self-TI) is a pilot study examining the acceptability and  
50  
51 67 feasibility of HPV self-testing among transgender and non-binary people conducted in  
52  
53  
54  
55  
56  
57  
58  
59  
60

1  
2  
3 68 England (IRAS# 319364 and clinicaltrials.gov NCT05883111). The study received  
4  
5 69 ethical approval from the Research Ethics Committee (REC) of Wales 4 (Wales REC 4,  
6  
7 70 #23/WA/0266) and the Ethical Review Panel within the Division of Cancer Epidemiology  
8  
9 71 and Genetics at the US National Cancer Institute (NCI) (#3G009-05). Amendments to  
10  
11 72 the protocol and study materials are approved by the REC and the protocol was last  
12  
13 73 revised on January 23, 2024 (4<sup>th</sup> revision). Before taking part in this pilot study, all  
14  
15 74 participants provide informed written consent to participate to the study staff.  
16  
17 75 Participants are asked if they consent to future use of their research specimens;  
18  
19 76 otherwise specimens will be destroyed after the aims of the study protocol are met.  
20  
21  
22  
23

#### 24 77 **Study setting and participant recruitment**

25  
26 78 Enrolment began in February 2024 and will continue for one year. Self-TI seeks  
27  
28 79 to enroll 50 participants who identify as TMNB with a cervix and 50 participants who  
29  
30 80 identify as TWNB assigned male at birth. Participants are recruited at one of three  
31  
32 81 clinical sites in England: CliniQ or Ambrose Kings sexual health clinics in London, or  
33  
34 82 Clinic-T in Brighton. These sites were chosen as they are in areas with large  
35  
36 83 transgender and non-binary populations, their providers are specialists in transgender  
37  
38 84 and non-binary sexual health, and the clinic staff have experience conducting research  
39  
40 85 studies. Participants can be recruited and pre-screened for study eligibility when they  
41  
42 86 book an appointment for a cervical cancer screening (TMNB study group only) or a  
43  
44 87 sexual health screening (TWNB study group only). Recruitment occurs through  
45  
46 88 advertisement posters and banners placed in the clinics, and flyers placed in gender  
47  
48 89 identity clinics and general practitioners' offices known to have transgender and non-  
49  
50 90 binary patients. Self-TI has created a website ([www.self-ti.com](http://www.self-ti.com)), which contains  
51  
52  
53  
54  
55  
56  
57  
58  
59  
60

1  
2  
3 91 information on the study, HPV and cancer education, and links to contact the study sites  
4  
5 92 to enrol. Self-TI also commissioned a well-known trans activist and artist in England, to  
6  
7 93 record a 45 second advertisement video. This video is posted the activist's social media  
8  
9 94 sites (Twitter, Instagram, and Tik Tok), other LGBTQ+ cancer charities in England, and  
10  
11 95 the Self-TI's website and social media sites. The Standard Protocol Items:  
12  
13  
14 96 Recommendations for Interventional Trials (SPIRIT) checklist is available as an online  
15  
16 97 supplemental file.<sup>42</sup>  
17  
18

## 19 98 **Participants**

20  
21 99 Individuals who identify as TMNB with a cervix, aged 25–65, with at least one  
22  
23 100 year of self-reported testosterone therapy, are eligible to participate in the TMNB study  
24  
25 101 group. Testosterone exposure is a requirement of study participation as it is associated  
26  
27 102 with vaginal atrophy such that speculum and swab insertion to the recommended depth  
28  
29 103 could be painful, unpleasant, or necessitate additional lubricant affecting the accuracy  
30  
31 104 and acceptability of clinician- and self-collected HPV testing.<sup>9 40</sup> Individuals who identify  
32  
33 105 as TWNB, aged 18 and over, are eligible to participate in the TWNB study group. TWNB  
34  
35 106 participants with a vagina are preferentially selected into the study, with the first three  
36  
37 107 months of enrolment restricted to individuals who had undergone vaginoplasty. After  
38  
39 108 three months, the study team will evaluate whether it is feasible to reach the targeted  
40  
41 109 sample size with this restriction and if not, the eligibility criterion will be removed.  
42  
43 110 Individuals with a vagina must have undergone vaginoplasty greater than one year prior  
44  
45 111 to entering the study due to safety concerns over self-sampling on recently healed  
46  
47 112 epithelium. All participants are given a participant information sheet, which is discussed  
48  
49 113 with study staff as part of informed consent procedures.  
50  
51  
52  
53  
54  
55  
56  
57  
58  
59  
60



## 114 Data collection

115 Study activities and timeline are presented in Table 1 and Figure 1. After giving  
 116 consent, participants fill out demographics and medical history questionnaires. The  
 117 demographics form asks for sexual orientation, race and ethnicity, and height and  
 118 weight. The medical history form asks about previous cancer screening, previous  
 119 cancer diagnoses, HPV vaccination, hormone therapy, and HIV status. Study staff  
 120 review these questionnaires with the participants to make sure they are complete and to  
 121 answer any questions the participants have.

**Table 1. Study activities and timeline**

| Study procedure          | Prior to Day 1 |                  | In Clinic Day 1  |               | At Home<br>≤ 4 weeks<br>(TWNB only) |
|--------------------------|----------------|------------------|------------------|---------------|-------------------------------------|
|                          | Screening      | Clinician        | Self-Sampling    | Self-Sampling |                                     |
| Eligibility assessment   | X              |                  |                  |               |                                     |
| Informed consent         |                |                  | X                |               |                                     |
| Demographics             |                |                  | X                |               |                                     |
| Medical history          |                |                  | X                |               |                                     |
| Vaginal swab             |                |                  | X*               |               | X*                                  |
| Anal swab                |                |                  | X                |               | X                                   |
| Oral rinse               |                |                  | X                |               | X                                   |
| Urine                    |                |                  | X                |               |                                     |
| Cervical swab            |                | X<br>(TMNB only) |                  |               |                                     |
| Survey                   |                |                  | X<br>(TMNB only) |               | X                                   |
| Adverse event assessment |                | X                | X                |               | X                                   |

\*All TMNB and only TWNB who have undergone vaginoplasty.

Abbreviations: TMNB = transmasculine and non-binary people with a cervix; TWNB= trans women and non-binary people assigned male at birth

122

## 123 Sampling

124 All participants are asked to self-collect samples in the clinic in the following  
 125 order: oral rinse, urine, vagina, and anus (collection materials are provided in Table 2).  
 126 Each participant will receive a self-sampling kit with written instructions for self-  
 127 collection that includes a QR code linked to an instructional video. Study staff will also  
 128 explain the self-collection procedures to the participants.

**Table 2. Collection materials of study specimens**

| Specimen Type       | Collection Method                                                    |
|---------------------|----------------------------------------------------------------------|
| Vaginal/neo-vaginal | Evalyn® Brush (Rovers® Medical, Belgium) or Dacron swab (DuPont, US) |
| Anal                | FLOQSwab (COPAN Diagnostics Inc., US)                                |
| Oral rinse          | Scope (Proctor and Gamble, US)                                       |
| Urine               | Colli-Pee (Novosanis, Belgium)                                       |
| Cervical            | Endocervical broom (Hologic, US)                                     |

129  
 130 The participants use Scope mouthwash (Proctor and Gamble, US) to collect  
 131 buccal cells and a Colli-pee® collection device (Novosanis, Belgium) to collect first void  
 132 urine (Table 2). The Colli-pee® device was selected as it has been used successfully by  
 133 sexual and gender minority participants in other studies and can accommodate a variety  
 134 of genital anatomies.

135 For the vaginal sample, participants have a choice to use either an Evalyn  
 136 Brush® (Rovers Medical, Belgium) or a Dacron swab (DuPont, US) (Table 2), if  
 137 applicable. The Evalyn Brush® was chosen for several features which make it easier to  
 138 use for populations unfamiliar with self-sampling. It has wings to guide the participant as  
 139 to how far they should insert the device, a plunger which releases the bristle brush to  
 140 the cervix and clicks to aid in the counting of the rotations. Participants who prefer a  
 141 slimmer vaginal swab are provided with a Dacron swab upon request (Table 2).  
 142 Participants use a FLOQSwab® (COPAN Diagnostics Inc., US) to collect the anal

1  
2  
3 143 sample (Table 2). The choice of sampling methods was based on a review of previous  
4  
5 144 studies that examined the same body sites and concordance between in-clinic and at-  
6  
7  
8 145 home sampling methods.<sup>43 44</sup>  
9

10 146 After the self-administered samples are collected, TMNB participants have a  
11  
12 147 pelvic exam as part of the standard cervical cancer screening. In England, individuals  
13  
14 148 with a cervix are invited to participate in the National Cervical Screening Programme  
15  
16  
17 149 (CSP) every 3 years for those between the ages of 25-49 and every 5 years for those  
18  
19 150 between the ages of 50-65. Screening is conducted with a primary HPV test and if  
20  
21  
22 151 positive, a reflex cervical sample is sent for cytology. Self-TI is paired with the CSP so  
23  
24 152 that TMNB individuals do not need to undergo pelvic exams more than once. In Self-TI,  
25  
26 153 the clinician will take two cervical swabs; the first for the (CSP) sent to the National  
27  
28 154 Health Service (NHS) laboratories, and the second for the clinician-collected sample for  
29  
30  
31 155 Self-TI using an endocervical broom (Hologic, US). The CSP sample is collected first so  
32  
33 156 that if the participant declines further samples the standard of care is met.  
34

35 157 After TWNB participants collect their self-administered samples, they will be  
36  
37 158 given a kit to complete a second vaginal (if applicable), anal, and oral rinse sampling at  
38  
39  
40 159 home. Once collected, the participant places the dry brushes and samples in the pre-  
41  
42 160 addressed, postage paid mailer provided before dropping it in the post within one month  
43  
44  
45 161 of their first study visit. The kit includes written instructions with a QR code linked to an  
46  
47 162 instructional video. Study staff follow up with TWNB study participants on a weekly  
48  
49 163 basis for up to four weeks to ensure the return of their study samples.  
50

#### 51 164 **Self-administered online survey**

52  
53  
54  
55  
56  
57  
58  
59  
60

1  
2  
3 165 After self-collection, participants take a self-administered online survey, which  
4  
5 166 takes approximately 20–25 minutes to complete. The survey includes questions on  
6  
7 167 based on previously validated surveys that capture sensitive demographic  
8  
9 168 characteristics, acceptability of self-sampling (e.g., physical and emotional comfort,  
10  
11 169 confidence in collection), comparing self-collected to clinician-collected sampling (TMNB  
12  
13 170 study group only),<sup>39</sup> comparing self-collected sampling in the clinic to at-home collection  
14  
15 171 (TWNB study group only), history of HPV vaccination, knowledge of HPV,<sup>39</sup> comparing  
16  
17 172 self-collected to clinician-collected sampling (TMNB study group only), medical  
18  
19 173 mistrust,<sup>45</sup> and sexual history.<sup>39 46</sup> comparing self-collected sampling in the clinic to at-  
20  
21 174 home collection (TWNB study group only), history of HPV vaccination, knowledge of  
22  
23 175 HPV,<sup>15</sup> medical mistrust,<sup>45</sup> and sexual history.<sup>46</sup> Participants receive a £20 gift card to a  
24  
25 176 large online retailer, as remuneration for their participation in Self-TI.

### 177 **Outcomes**

178 The primary study outcomes are the acceptability and feasibility of self-sampling  
179 among participants that will inform a larger study. Acceptability is measured by the  
180 physical and emotional responses to self-sampling for each collection method using a 7-  
181 point Likert scale. Feasibility is measured by the proportion of specimens returned from  
182 self-collection in the clinic and those mailed from home.

183 This pilot study will also estimate the study prevalence of HPV (positivity and  
184 genotype) and the correlation of HPV detection between the four self-collected samples.  
185 The concordance between the vaginal self-collected sample and clinician-collected  
186 cervical sample will be estimated among TMNB. Among TWNB, we will estimate the  
187 correlation between the samples collected by participants in the clinic with the samples

1  
2  
3 188 collected at home. Finally, Self-TI will collect exploratory data on risk factors associated  
4  
5 189 with HPV prevalence, which can be fully assessed in a larger trial.  
6

### 7 190 **HPV testing**

8  
9  
10 191 The cervical, vaginal, and anal swabs are reconstituted in a plastic vial with  
11  
12 192 PreservCyt transport medium (ThinPrep PreserveCyt Solution, Hologic, US) before  
13  
14 193 freezing at -80°C. Oral and urine samples are placed directly into -80°C. Samples are  
15  
16 194 shipped in batches to the Center for Genomic Research (CGR) at NCI. All samples will  
17  
18 195 be tested using a next-generation sequencing based-assay (TypeSeq) developed by  
19  
20 196 CGR, which generates a positive/negative result for 51 HPV genotypes.<sup>47</sup>  
21  
22

### 23 197 **Data management**

24  
25  
26 198 Data management and project coordination is done at the Division of Cancer  
27  
28 199 Epidemiology and Genetics at NCI. Study oversight and data management are led by  
29  
30 200 the study chief investigator (AMB) and the statistician (SSJ). Research staff enter de-  
31  
32 201 identified participant data into an electronic data capture system. All participant  
33  
34 202 information (including laboratory data) is confidential and stored in a secure location.  
35  
36 203 Only the personnel listed on the delegation log will have access to participant data; the  
37  
38 204 statistician and laboratory personnel have access to deidentified data only. Participant  
39  
40 205 data are checked at regular intervals for quality assurance. The number of AEs is  
41  
42 206 expected to be very small and thus an independent Data Monitoring Committee was not  
43  
44 207 appointed. However, all adverse events will be collected, and severe adverse events  
45  
46 208 deemed by the chief investigator to be related to study procedures and unexpected, will  
47  
48 209 be reported to the sponsor within 24 hours and to the REC within 15 days of learning of  
49  
50 210 the event.  
51  
52  
53  
54  
55  
56  
57  
58  
59  
60

## 211 **Statistical analysis**

212 Acceptability of self-sampling procedures will be measured on the self-  
213 administered online survey, which uses a 7-point Likert scale with 1 indicating strong  
214 disagreement and 7 indicating strong agreement. Summary measures of these  
215 questions will be reported (average score for each question) separately for each group.  
216 For all participants, feasibility will be measured by the proportion of participants who are  
217 able to complete the self-collection procedures in the clinic. For TWNB participants, at-  
218 home feasibility will be measured by the proportion of TWNB participants who are able  
219 to complete and return all self-collection procedures at home.

220 For our secondary objectives, we will estimate the prevalence of HPV, overall,  
221 and by genotype in each of the self-collected samples from the two groups, separately.  
222 The phi-coefficient and associated *P*-values will be estimated to assess HPV positivity  
223 correlation between the four anatomic sites. Further, we will calculate the Cohen's  
224 kappa statistic as a measure of percent positive agreement of HPV positivity in self-  
225 collected vaginal samples versus the clinician-collected cervical samples among TMNB  
226 and in self-collected in clinic samples versus self-collected at home samples among  
227 TWNB, respectively.

## 228 **Patient and public involvement**

229 A patient and public involvement (PPI) group was formed prior to the submission  
230 of the Self-TI protocol to regulatory bodies. PPI played an important role in the design  
231 and conduct of the study, and participant recruitment. Six group meetings were held  
232 between May 2022–August 2023 with six members. PPI members represented the target  
233 population of Self-TI, including transfeminine, transmasculine, and non-binary

1  
2  
3 234 individuals. Authors SSJ, SOC, and EW attended all meetings, which were led either by  
4  
5 235 SOC or EW who are members of the transgender and non-binary community, and SOC  
6  
7 236 is the founder of a cancer charity for lesbian, gay, bisexual, transgender, intersex, and  
8  
9  
10 237 queer individuals. PPI members reviewed the study protocol, data collection forms,  
11  
12 238 online self-administered survey, advertisement and recruitment plan, instructional video,  
13  
14 239 and results dissemination plan. Meetings were conducted over Zoom in the evenings to  
15  
16  
17 240 accommodate members' schedules and followed up via email to provide additional  
18  
19 241 opportunities for written feedback on materials. Online meetings included short  
20  
21 242 presentations on HPV-related cancer topics given by experts in the field to provide  
22  
23 243 information exchange. PPI members were compensated for their time with multi-retailer  
24  
25  
26 244 gift cards to an amount in line with National Institute for Health Research guidelines.

27  
28 245 Several important suggestions were made by the PPI group and adopted into the  
29  
30 246 study protocol. The standard Evalyn® brush is manufactured in a dark pink color, which  
31  
32 247 was suggested could be off putting to our participants, so we worked with the  
33  
34 248 manufacturers to provide Self-TI with devices in a more neutral blue color. Though the  
35  
36  
37 249 Evalyn® brush has several features that make it ideal for individuals who are not  
38  
39 250 familiar with self-sampling, one drawback is that it is slightly thicker than other swabs  
40  
41 251 used for vaginal sampling. Therefore, it was suggested by the PPI group that  
42  
43 252 participants be provided with a slimmer swab upon request. Additionally, though it is  
44  
45 253 preferred that TMNB participants complete the survey in the clinic after their exam, the  
46  
47 254 PPI group felt that participants should be given the option to complete the survey at  
48  
49 255 home. This change was implemented and TMNB participants can scan or be emailed a  
50  
51 256 QR code to the survey link after leaving the clinic if desired. The group felt that some  
52  
53  
54  
55  
56  
57  
58  
59  
60

1  
2  
3 257 participants would want to leave the clinic immediately after their speculum exam as it  
4  
5 258 may result in increased feelings of dysphoria and can be uncomfortable or painful for  
6  
7  
8 259 some participants.  
9

## 10 260 **ETHICS AND DISSEMINATION**

11  
12 261 People with a male gender marker in their medical record are not invited to  
13  
14 262 participate in the CSP and the laboratory may reject cervical samples from male  
15  
16  
17 263 patients. The chief investigator worked with the laboratories processing CSP samples  
18  
19 264 for Self-TI participants to ensure samples would not be discarded prior to testing. Senior  
20  
21 265 staff (AMB and SSJ) also consulted the US National Institutes of Health Bioethics group  
22  
23 266 about returning study results to the participants. Because the assay under study in Self-  
24  
25  
26 267 TI is a research test and not approved for clinical use in the UK, participants will not  
27  
28 268 have their study results returned to them. Instead, TMNB participants should defer to  
29  
30  
31 269 the HPV result provided by the CSP, as applicable. Further, in cases where the HPV  
32  
33 270 result from Self-TI conflicts with the CSP result or in the absence of a CSP result (as in  
34  
35 271 the case of TWNB samples), senior study staff felt that providing participants with a  
36  
37 272 result that could not be followed up with clinically could cause distress and would be  
38  
39  
40 273 unethical. Only HPV positive results taken from samples as part of the CSP will warrant  
41  
42 274 follow up under the NHS.  
43

44 275 Information gained from this study will be published in peer-reviewed journals  
45  
46 276 and presented at national and international conferences. Prior to scientific  
47  
48  
49 277 dissemination, we will engage with the PPI group in writing the lay results, results  
50  
51 278 dissemination strategy and final publication. The lay summary of the results will be  
52  
53  
54 279 posted to the Self-TI website, participating clinic websites, and the websites of charities  
55  
56  
57  
58  
59  
60



1  
2  
3 280 and organisations supporting trans and non-binary people so that study participants and  
4  
5 281 community members may be notified of the results first at the PPI group's request.  
6  
7  
8 282 Several online webinars are planned to disseminate the results and allow community  
9  
10 283 members to engage in a discussion with the researchers. These webinars will be  
11  
12 284 recorded and posted on the Self-TI website. Finally, data from this pilot study will inform  
13  
14  
15 285 a larger, multi-center, international study.

## 16 17 286 **DISCUSSION**

18  
19 287 The overarching goal of this pilot study is to provide important insight into the  
20  
21 288 acceptability and feasibility of HPV self-sampling among transgender and gender  
22  
23 289 diverse individuals for a larger study. The pilot study will provide essential data that will  
24  
25  
26 290 inform recruitment, study procedures, and sample size calculations for this larger study.

27  
28 291 A major strength of our study is community involvement from conception to  
29  
30 292 implementation. We included community voices at every stage of protocol development  
31  
32 293 and have had a dedicated PPI group in addition to transgender and non-binary senior  
33  
34 294 study staff advising our study throughout. This strategy has led to improved  
35  
36  
37 295 advertisements, study materials, and outreach efforts. Continued work with community  
38  
39 296 members will help us disseminate study results to a wider audience.

40  
41  
42 297 Potential study limitations include the inability to generalize our results to the  
43  
44 298 wider transgender population in England as we used sexual health clinics in two major  
45  
46  
47 299 cities to recruit our participants. Compared to the general population of transgender  
48  
49 300 individuals, our study participants may be more engaged in care, have greater access to  
50  
51 301 care, and have higher health seeking behaviors. This recruitment strategy was chosen  
52  
53  
54 302 to maximize the proportion of positive HPV tests, to enable recruitment of a reasonable

1  
2  
3 303 sample size in a short amount of time. Finally, the implementation of HPV self-sampling  
4  
5 304 methods and strategies may reduce barriers for transgender and non-binary people in  
6  
7 305 high-resourced areas, but barriers will remain for individuals who live in areas where  
8  
9 306 there is widespread discrimination resulting in a lack of access to culturally appropriate  
10  
11 307 screening.  
12  
13  
14  
15 308

For peer review only

1  
2  
3 **Authors' contributions:** AMB and SSJ conceived, designed, and supervised the study.

4  
5 AMB and SSJ are responsible for data management. SSJ drafted the manuscript. MC  
6  
7 supervised the HPV methylation assay and provided several methodological  
8  
9 contributions. SOC maintains the study website. SSJ, SOC, and EW oversaw the  
10  
11 coordination of the PPI group. AMB, SSJ, SOC, and EW were responsible for creating  
12  
13 the study survey. All authors revised the manuscript and approved the final draft.  
14  
15

16  
17 **Acknowledgements:** We wish to thank the Self-TI participants, Fox Fisher for  
18  
19 voiceover of the instruction video and study promotion.  
20

21  
22 **Collaborators:** Self-TI Study group: Affiliated with The Caldecot Centre and CliniQ at  
23  
24 King's College Hospital NHS Trust: Ellen Adams, Kate Flanagan, Lucy Campbell, and  
25  
26 Birgit Barbini; Brighton and Howe Sexual Health Clinic: Sophie Ross and Lisa Barbour;  
27  
28 and Ambrose Kings Centre: Chloe Orkin, Kyle Ring and James Hand; Center for  
29  
30 Genomic Research at the National Cancer Institute: Amy Hutchinson and Casey  
31  
32 Dagnell. Special thanks to the members of our PPI group, Fox Fisher, and Emrah Onal.  
33  
34

35  
36 **Funding statement:** Self-TI was funded by the Intramural Research Program of the  
37  
38 Division of Cancer Epidemiology and Genetics at the National Cancer Institute,  
39  
40 Bethesda, MD, US (Grant no: NA). The PPI group was funded by the Centre for Public  
41  
42 Engagement, Queen Mary University of London, London, England (Grant no: NA).  
43

44  
45 **Sponsorship information:** Queen Mary University of London, Dr Mays Jawad,  
46  
47 Research Governance Operations Manager, Joint Research Management Office,  
48  
49 research.governance@qmul.ac.uk  
50

51  
52 **Sponsors references:** IRAS Number: 319364; Edge Number: 155220  
53  
54  
55  
56  
57  
58  
59  
60

1  
2  
3 **Competing interest statement:** AMB is a trustee of OUTpatients, of which SOC is  
4  
5 CEO. None of the other authors have any conflicts to declare.  
6

7  
8 **Patient and public involvement:** Patients and the community were involved in the  
9  
10 design, conduct, and dissemination plans of this research. Refer to the Methods section  
11  
12 for further details.  
13  
14  
15  
16  
17  
18  
19  
20  
21  
22  
23  
24  
25  
26  
27  
28  
29  
30  
31  
32  
33  
34  
35  
36  
37  
38  
39  
40  
41  
42  
43  
44  
45  
46  
47  
48  
49  
50  
51  
52  
53  
54  
55  
56  
57  
58  
59  
60

For peer review only

## REFERENCES

1. de Martel C, Georges D, Bray F, et al. Global burden of cancer attributable to infections in 2018: a worldwide incidence analysis. *The Lancet Global health* 2019 doi: 10.1016/s2214-109x(19)30488-7 [published Online First: 2019/12/22]
2. Sasieni P, Castanon A, Cuzick J. Effectiveness of cervical screening with age: population based case-control study of prospectively recorded data. *Bmj* 2009;339:b2968. doi: 10.1136/bmj.b2968 [published Online First: 2009/07/28]
3. Stier EA, Clarke MA, Deshmukh AA, et al. International Anal Neoplasia Society's consensus guidelines for anal cancer screening. *International journal of cancer*;n/a(n/a) doi: <https://doi.org/10.1002/ijc.34850>
4. Palefsky JM, Lee JY, Jay N, et al. Treatment of Anal High-Grade Squamous Intraepithelial Lesions to Prevent Anal Cancer. *New England Journal of Medicine* 2022;386(24):2273-82. doi: 10.1056/NEJMoa2201048
5. Stewart T, Lee YA, Damiano EA. Do Transgender and Gender Diverse Individuals Receive Adequate Gynecologic Care? An Analysis of a Rural Academic Center. *Transgend Health* 2020;5(1):50-58. doi: 10.1089/trgh.2019.0037 [published Online First: 2020/04/24]
6. Clark MA, Boehmer U, Rosenthal S. Cancer screening in lesbian and bisexual women and transmen. In: Boehmer U, Elk R, eds. *Cancer and the LGBT Community*. Switzerland: Springer International Publishing 2015:83-98.
7. Peitzmeier SM, Khullar K, Reisner SL, Potter J. Pap test use is lower among female-to-male patients than non-transgender women. *American journal of preventive medicine* 2014;47(6):808-12. doi: 10.1016/j.amepre.2014.07.031 [published Online First: 2014/12/03]
8. Tabaac AR, Sutter ME, Wall CSJ, Baker KE. Gender Identity Disparities in Cancer Screening Behaviors. *American journal of preventive medicine* 2018;54(3):385-93. doi: <https://doi.org/10.1016/j.amepre.2017.11.009>
9. Peitzmeier SM, Reisner SL, Harigopal P, Potter J. Female-to-male patients have high prevalence of unsatisfactory Paps compared to non-transgender females: implications for cervical cancer screening. *J Gen Intern Med* 2014;29(5):778-84. doi: 10.1007/s11606-013-2753-1 [published Online First: 2014/01/16]
10. James SE, Herman JL, Keisling M, et al. *The Report of the 2015 U.S. Transgender Survey*. Washington, D.C.: National Center for Transgender Equality, 2016.
11. Grant JM, Mottet LA, Tanis J, et al. *Injustice at Every Turn: A Report of the National Transgender Discrimination Survey*. Washington, DC: National Center for Transgender Equality and National Gay and Lesbian Task Force, 2011.
12. Seay J, Ranck A, Weiss R, et al. Understanding Transgender Men's Experiences with and Preferences for Cervical Cancer Screening: A Rapid Assessment Survey. *LGBT Health* 2017;4(4):304-09. doi: 10.1089/lgbt.2016.0143 [published Online First: 2017/04/20]
13. Agenor M, Peitzmeier SM, Bernstein IM, et al. Perceptions of cervical cancer risk and screening among transmasculine individuals: patient and provider perspectives. *Cult Health Sex* 2016;18(10):1192-206. doi: 10.1080/13691058.2016.1177203 [published Online First: 2016/05/05]
14. Potter J, Peitzmeier SM, Bernstein I, et al. Cervical Cancer Screening for Patients on the Female-to-Male Spectrum: a Narrative Review and Guide for Clinicians. *J Gen Intern Med* 2015;30(12):1857-64. doi: 10.1007/s11606-015-3462-8 [published Online First: 2015/07/15]

15. Berner AM, Connolly DJ, Pinnell I, et al. Attitudes of transgender men and non-binary people to cervical screening: a cross-sectional mixed-methods study in the UK. *Br J Gen Pract* 2021;71(709):e614-e25. doi: 10.3399/bjgp.2020.0905 [published Online First: 20210729]
16. Brown B, Poteat T, Marg L, Galea JT. Human Papillomavirus-Related Cancer Surveillance, Prevention, and Screening Among Transgender Men and Women: Neglected Populations at High Risk. *LGBT Health* 2017;4(5):315-19. doi: 10.1089/lgbt.2016.0142 [published Online First: 2017/09/07]
17. Public Health England. Human Papillomavirus (HPV) Vaccine Coverage in England, 2008/09 to 2013/14: A review of the full six years of the three-dose schedule 2015 [Available from: [https://assets.publishing.service.gov.uk/media/5c4f232ced915d7d3953d207/HPV\\_Vaccine\\_Coverage\\_in\\_England\\_200809\\_to\\_201314.pdf](https://assets.publishing.service.gov.uk/media/5c4f232ced915d7d3953d207/HPV_Vaccine_Coverage_in_England_200809_to_201314.pdf) accessed January 16 2024.
18. Public Health England. Changes to the vaccine of the HPV immunisation programme 2021 [updated July 27. Available from: [https://assets.publishing.service.gov.uk/media/60feecf38fa8f5043b11e46a/HPV\\_letter\\_changes\\_to\\_the\\_vaccine\\_of\\_the HPV\\_immunisation\\_programme\\_July\\_2021.pdf](https://assets.publishing.service.gov.uk/media/60feecf38fa8f5043b11e46a/HPV_letter_changes_to_the_vaccine_of_the HPV_immunisation_programme_July_2021.pdf).
19. National Health Service. HPV Vaccine 2023 [Available from: <https://www.nhs.uk/conditions/vaccinations/hpv-human-papillomavirus-vaccine/> accessed February 13 2024.
20. Information on HPV vaccination [Available from: <https://www.gov.uk/government/publications/hpv-vaccine-vaccination-guide-leaflet/information-on-hpv-vaccination> accessed August 8 2022.
21. Kirwan P, Hibbert M, Kall M, et al. HIV prevalence and HIV clinical outcomes of transgender and gender-diverse people in England. *HIV Medicine* 2021;22(2):131-39. doi: <https://doi.org/10.1111/hiv.12987>
22. Sun X-W, Kuhn L, Ellerbrock TV, et al. Human papillomavirus infection in women infected with the human immunodeficiency virus. *New England Journal of Medicine* 1997;337(19):1343-49.
23. Strickler HD, Burk RD, Fazzari M, et al. Natural history and possible reactivation of human papillomavirus in human immunodeficiency virus-positive women. *Journal of the National Cancer Institute* 2005;97(8):577-86.
24. Cameron JE, Hagensee ME. Human papillomavirus infection and disease in the HIV+ individual. *Aids-Associated Viral Oncogenesis* 2007:185-213.
25. Chaturvedi AK, Madeleine MM, Biggar RJ, Engels EA. Risk of Human Papillomavirus-Associated Cancers Among Persons With AIDS. *JNCI: Journal of the National Cancer Institute* 2009;101(16):1120-30. doi: 10.1093/jnci/djp205
26. Palefsky JM. Anal squamous intraepithelial lesions: relation to HIV and human papillomavirus infection. *JAIDS Journal of Acquired Immune Deficiency Syndromes* 1999;21:S42-S48.
27. Singh V, Gratzler B, Gorbach PM, et al. Transgender Women Have Higher Human Papillomavirus Prevalence Than Men Who Have Sex With Men—Two U.S. Cities, 2012–2014. *Sexually transmitted diseases* 2019;46(10)
28. de Oliveira BR, Diniz ESBV, Dos Santos KC, et al. Human Papillomavirus Positivity at 3 Anatomical Sites Among Transgender Women in Central Brazil. *Sexually transmitted diseases* 2023;50(9):567-74. doi: 10.1097/olq.0000000000001830 [published Online First: 20230521]
29. van der Sluis WB, Buncamper ME, Bouman MB, et al. Prevalence of Neovaginal High-Risk Human Papillomavirus Among Transgender Women in The Netherlands. *Sexually*

- 1  
2  
3  
4  
5  
6  
7  
8  
9  
10  
11  
12  
13  
14  
15  
16  
17  
18  
19  
20  
21  
22  
23  
24  
25  
26  
27  
28  
29  
30  
31  
32  
33  
34  
35  
36  
37  
38  
39  
40  
41  
42  
43  
44  
45  
46  
47  
48  
49  
50  
51  
52  
53  
54  
55  
56  
57  
58  
59  
60
- transmitted diseases* 2016;43(8):503-5. doi: 10.1097/olq.0000000000000476 [published Online First: 2016/07/16]
30. Uaamnuichai S, Panyakhamlerd K, Suwan A, et al. Neovaginal and Anal High-Risk Human Papillomavirus DNA Among Thai Transgender Women in Gender Health Clinics. *Sexually transmitted diseases* 2021;48(8):547-49. doi: 10.1097/olq.0000000000001388
31. NHS population screening: information for trans and non-binary people. [Available from: <https://www.gov.uk/government/publications/nhs-population-screening-information-for-transgender-people/nhs-population-screening-information-for-trans-people> accessed August 8 2022.
32. Grosse A, Grosse C, Lenggenhager D, et al. Cytology of the neovagina in transgender women and individuals with congenital or acquired absence of a natural vagina. *Cytopathology* 2017;28(3):184-91. doi: 10.1111/cyt.12417 [published Online First: 20170220]
33. Fierz R, Ghisu GP, Fink D. Squamous Carcinoma of the Neovagina after Male-to-Female Reconstruction Surgery: A Case Report and Review of the Literature. *Case Rep Obstet Gynecol* 2019;2019:4820396. doi: 10.1155/2019/4820396 [published Online First: 20190116]
34. Arbyn M, Smith SB, Temin S, et al. Detecting cervical precancer and reaching underscreened women by using HPV testing on self samples: updated meta-analyses. *BMJ* 2018;363:k4823. doi: 10.1136/bmj.k4823 [published Online First: 2018/12/07]
35. Arbyn M, Verdoodt F, Snijders PJ, et al. Accuracy of human papillomavirus testing on self-collected versus clinician-collected samples: a meta-analysis. *Lancet Oncol* 2014;15(2):172-83. doi: 10.1016/S1470-2045(13)70570-9 [published Online First: 2014/01/18]
36. McDowell M, Pardee DJ, Peitzmeier S, et al. Cervical Cancer Screening Preferences Among Trans-Masculine Individuals: Patient-Collected Human Papillomavirus Vaginal Swabs Versus Provider-Administered Pap Tests. *LGBT Health* 2017;4(4):252-59. doi: 10.1089/lgbt.2016.0187 [published Online First: 2017/07/01]
37. Welsh EF, Andrus EC, Sandler CB, et al. Cervicovaginal and anal self-sampling for HPV testing in a transgender and gender diverse population assigned female at birth: comfort, difficulty, and willingness to use. *medRxiv* 2023 doi: 10.1101/2023.08.15.23294132 [published Online First: 20230816]
38. Peitzmeier SM, Agenor M, Bernstein IM, et al. "It Can Promote an Existential Crisis": Factors Influencing Pap Test Acceptability and Utilization Among Transmasculine Individuals. *Qual Health Res* 2017;27(14):2138-49. doi: 10.1177/1049732317725513 [published Online First: 2017/08/25]
39. Reisner SL, Deutsch MB, Peitzmeier SM, et al. Comparing self- and provider-collected swabbing for HPV DNA testing in female-to-male transgender adult patients: a mixed-methods biobehavioral study protocol. *BMC Infect Dis* 2017;17(1):444. doi: 10.1186/s12879-017-2539-x [published Online First: 2017/06/25]
40. Reisner SL, Deutsch MB, Peitzmeier SM, et al. Test performance and acceptability of self-versus provider-collected swabs for high-risk HPV DNA testing in female-to-male trans masculine patients. *PLoS One* 2018;13(3):e0190172. doi: 10.1371/journal.pone.0190172 [published Online First: 2018/03/15]
41. Nyitray AG, Nitkowski J, McAuliffe TL, et al. Home-based self-sampling vs clinician sampling for anal precancer screening: The Prevent Anal Cancer Self-Swab Study. *International journal of cancer* 2023;153(4):843-53. doi: <https://doi.org/10.1002/ijc.34553>

- 1  
2  
3  
4  
5  
6 42. SPIRIT 2013 Statement: Defining Standard Protocol Items for Clinical Trials. *Annals of*  
7 *Internal Medicine* 2013;158(3):200-07. doi: 10.7326/0003-4819-158-3-201302050-00583  
8 %m 23295957  
9  
10 43. Wolfrum SG, Koutsky LA, Hughes JP, et al. Evaluation of dry and wet transport of at-home  
11 self-collected vaginal swabs for human papillomavirus testing. *Journal of Medical*  
12 *Microbiology* 2012;61(11):1538-45. doi: <https://doi.org/10.1099/jmm.0.046110-0>  
13  
14 44. Eperon I, Vassilakos P, Navarra I, et al. Randomized comparison of vaginal self-sampling  
15 by standard vs. dry swabs for human papillomavirus testing. *BMC Cancer* 2013;13:353.  
16 doi: 10.1186/1471-2407-13-353 [published Online First: 20130722]  
17  
18 45. LaVeist TA, Isaac LA, Williams KP. Mistrust of health care organizations is associated with  
19 underutilization of health services. *Health Serv Res* 2009;44(6):2093-105. doi:  
20 10.1111/j.1475-6773.2009.01017.x [published Online First: 20090902]  
21  
22 46. Johnson A. National Survey of Sexual Attitudes and Lifestyles, 2010–2012. URL:  
23 [https://beta](https://beta.ukdataservice.ac.uk/datacatalogue/studies/study)  
24 [ukdataservice ac uk/datacatalogue/studies/study](https://beta.ukdataservice.ac.uk/datacatalogue/studies/study) 2015  
25  
26 47. Ben-Batalla I, Vargas-Delgado ME, Meier L, Loges S. Sexual dimorphism in solid and  
27 hematological malignancies. *Semin Immunopathol* 2019;41(2):251-63. doi:  
28 10.1007/s00281-018-0724-7 [published Online First: 2018/10/27]  
29  
30  
31  
32  
33  
34  
35  
36  
37  
38  
39  
40  
41  
42  
43  
44  
45  
46  
47  
48  
49  
50  
51  
52  
53  
54  
55  
56  
57  
58  
59  
60



Figure 1. Study Flow

**Transmasculine and non-binary people with a cervix**

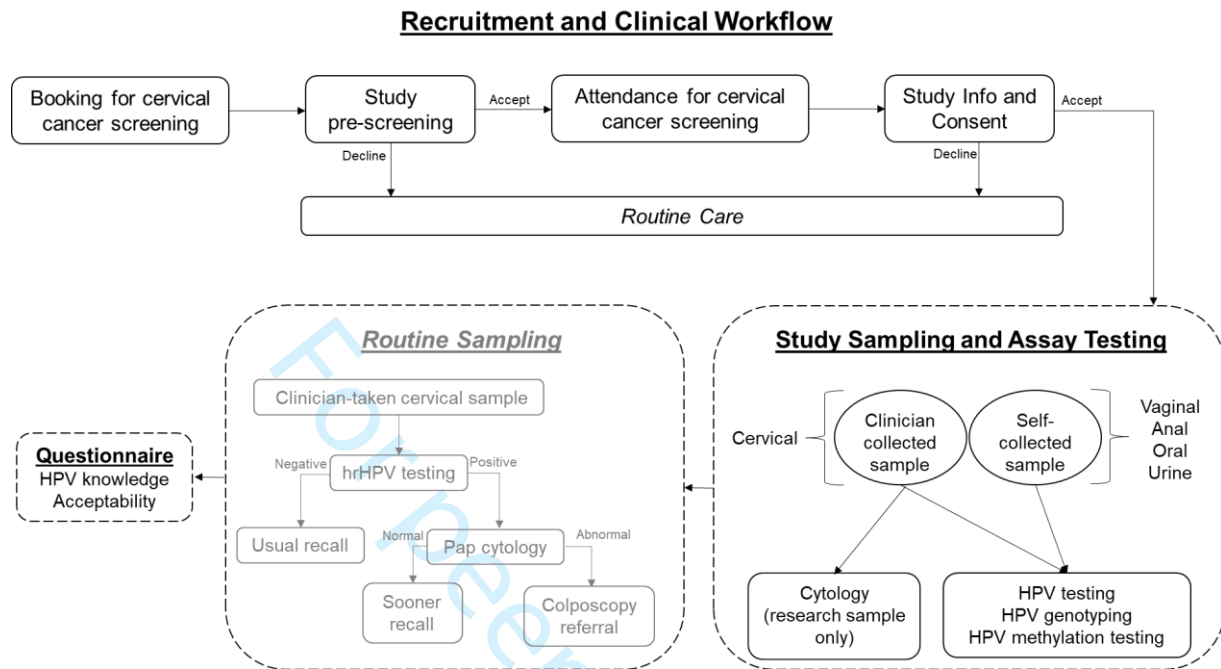

**Trans women and non-binary people assigned male at birth**

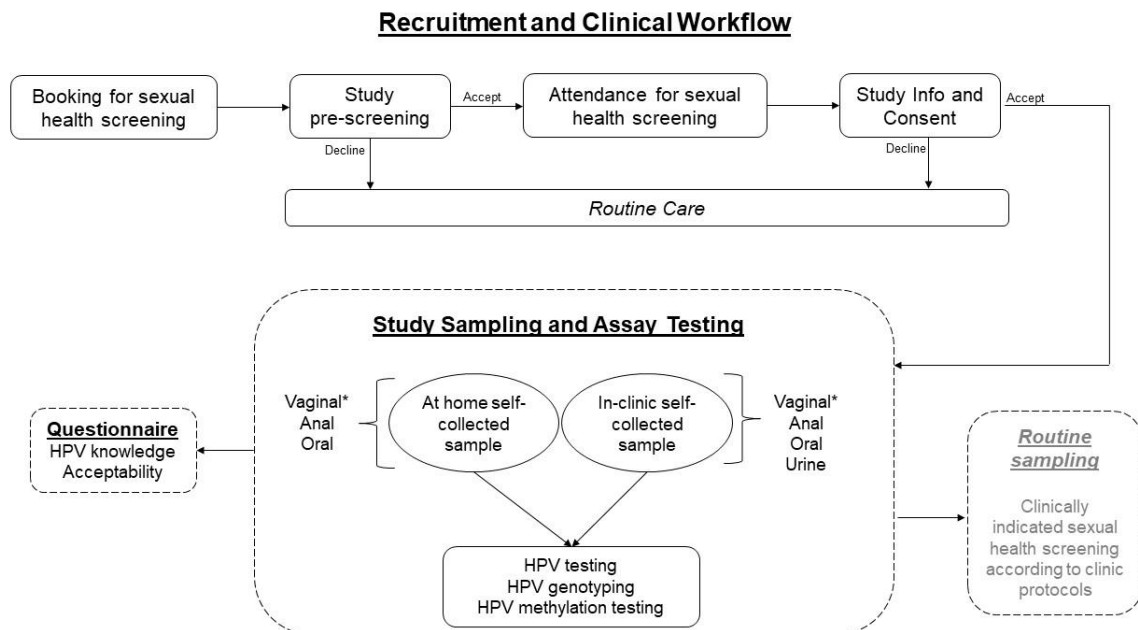

\*Participants will only collect vaginal samples if they have undergone vaginoplasty



1 **Introduction**

2

3 Background and rationale 6a Description of research question and justification for undertaking the trial, including summary of relevant studies (published and unpublished) examining benefits and harms for each intervention 4-6

4

5

6 6b Explanation for choice of comparators N/A

7

8 Objectives 7 Specific objectives or hypotheses 6

9

10 Trial design 8 Description of trial design including type of trial (eg, parallel group, crossover, factorial, single group), allocation ratio, and framework (eg, superiority, equivalence, noninferiority, exploratory) 6

11

12

13

14 **Methods: Participants, interventions, and outcomes**

15

16 Study setting 9 Description of study settings (eg, community clinic, academic hospital) and list of countries where data will be collected. Reference to where list of study sites can be obtained 6-8

17

18

19 Eligibility criteria 10 Inclusion and exclusion criteria for participants. If applicable, eligibility criteria for study centres and individuals who will perform the interventions (eg, surgeons, psychotherapists) 8

20

21

22

23 Interventions 11a Interventions for each group with sufficient detail to allow replication, including how and when they will be administered 8-12

24

25

26 11b Criteria for discontinuing or modifying allocated interventions for a given trial participant (eg, drug dose change in response to harms, participant request, or improving/worsening disease) N/A

27

28

29 11c Strategies to improve adherence to intervention protocols, and any procedures for monitoring adherence (eg, drug tablet return, laboratory tests) 12

30

31

32 11d Relevant concomitant care and interventions that are permitted or prohibited during the trial N/A

33

34 Outcomes 12 Primary, secondary, and other outcomes, including the specific measurement variable (eg, systolic blood pressure), analysis metric (eg, change from baseline, final value, time to event), method of aggregation (eg, median, proportion), and time point for each outcome. Explanation of the clinical relevance of chosen efficacy and harm outcomes is strongly recommended 12-13

35

36

37

38

39

40 Participant timeline 13 Time schedule of enrolment, interventions (including any run-ins and washouts), assessments, and visits for participants. A schematic diagram is highly recommended (see Figure) 8-12, Table 1

41

42

43

44

45

46

|    |                                                                     |     |                                                                                                                                                                                                                                                                                                                                                                                                              |                     |
|----|---------------------------------------------------------------------|-----|--------------------------------------------------------------------------------------------------------------------------------------------------------------------------------------------------------------------------------------------------------------------------------------------------------------------------------------------------------------------------------------------------------------|---------------------|
| 1  | Sample size                                                         | 14  | Estimated number of participants needed to achieve study objectives and how it was determined, including clinical and statistical assumptions supporting any sample size calculations                                                                                                                                                                                                                        | <u>7</u>            |
| 2  |                                                                     |     |                                                                                                                                                                                                                                                                                                                                                                                                              |                     |
| 3  |                                                                     |     |                                                                                                                                                                                                                                                                                                                                                                                                              |                     |
| 4  | Recruitment                                                         | 15  | Strategies for achieving adequate participant enrolment to reach target sample size                                                                                                                                                                                                                                                                                                                          | <u>7, 8, and 12</u> |
| 5  |                                                                     |     |                                                                                                                                                                                                                                                                                                                                                                                                              |                     |
| 6  |                                                                     |     |                                                                                                                                                                                                                                                                                                                                                                                                              |                     |
| 7  | <b>Methods: Assignment of interventions (for controlled trials)</b> |     |                                                                                                                                                                                                                                                                                                                                                                                                              |                     |
| 8  | Allocation:                                                         |     |                                                                                                                                                                                                                                                                                                                                                                                                              |                     |
| 9  |                                                                     |     |                                                                                                                                                                                                                                                                                                                                                                                                              |                     |
| 10 | Sequence generation                                                 | 16a | Method of generating the allocation sequence (eg, computer-generated random numbers), and list of any factors for stratification. To reduce predictability of a random sequence, details of any planned restriction (eg, blocking) should be provided in a separate document that is unavailable to those who enrol participants or assign interventions                                                     | <u>N/A</u>          |
| 11 |                                                                     |     |                                                                                                                                                                                                                                                                                                                                                                                                              |                     |
| 12 |                                                                     |     |                                                                                                                                                                                                                                                                                                                                                                                                              |                     |
| 13 |                                                                     |     |                                                                                                                                                                                                                                                                                                                                                                                                              |                     |
| 14 |                                                                     |     |                                                                                                                                                                                                                                                                                                                                                                                                              |                     |
| 15 |                                                                     |     |                                                                                                                                                                                                                                                                                                                                                                                                              |                     |
| 16 | Allocation concealment mechanism                                    | 16b | Mechanism of implementing the allocation sequence (eg, central telephone; sequentially numbered, opaque, sealed envelopes), describing any steps to conceal the sequence until interventions are assigned                                                                                                                                                                                                    | <u>N/A</u>          |
| 17 |                                                                     |     |                                                                                                                                                                                                                                                                                                                                                                                                              |                     |
| 18 |                                                                     |     |                                                                                                                                                                                                                                                                                                                                                                                                              |                     |
| 19 |                                                                     |     |                                                                                                                                                                                                                                                                                                                                                                                                              |                     |
| 20 |                                                                     |     |                                                                                                                                                                                                                                                                                                                                                                                                              |                     |
| 21 | Implementation                                                      | 16c | Who will generate the allocation sequence, who will enrol participants, and who will assign participants to interventions                                                                                                                                                                                                                                                                                    | <u>N/A</u>          |
| 22 |                                                                     |     |                                                                                                                                                                                                                                                                                                                                                                                                              |                     |
| 23 |                                                                     |     |                                                                                                                                                                                                                                                                                                                                                                                                              |                     |
| 24 | Blinding (masking)                                                  | 17a | Who will be blinded after assignment to interventions (eg, trial participants, care providers, outcome assessors, data analysts), and how                                                                                                                                                                                                                                                                    | <u>N/A</u>          |
| 25 |                                                                     |     |                                                                                                                                                                                                                                                                                                                                                                                                              |                     |
| 26 |                                                                     |     |                                                                                                                                                                                                                                                                                                                                                                                                              |                     |
| 27 |                                                                     | 17b | If blinded, circumstances under which unblinding is permissible, and procedure for revealing a participant's allocated intervention during the trial                                                                                                                                                                                                                                                         | <u>N/A</u>          |
| 28 |                                                                     |     |                                                                                                                                                                                                                                                                                                                                                                                                              |                     |
| 29 |                                                                     |     |                                                                                                                                                                                                                                                                                                                                                                                                              |                     |
| 30 |                                                                     |     |                                                                                                                                                                                                                                                                                                                                                                                                              |                     |
| 31 | <b>Methods: Data collection, management, and analysis</b>           |     |                                                                                                                                                                                                                                                                                                                                                                                                              |                     |
| 32 |                                                                     |     |                                                                                                                                                                                                                                                                                                                                                                                                              |                     |
| 33 | Data collection methods                                             | 18a | Plans for assessment and collection of outcome, baseline, and other trial data, including any related processes to promote data quality (eg, duplicate measurements, training of assessors) and a description of study instruments (eg, questionnaires, laboratory tests) along with their reliability and validity, if known. Reference to where data collection forms can be found, if not in the protocol | <u>9-12</u>         |
| 34 |                                                                     |     |                                                                                                                                                                                                                                                                                                                                                                                                              |                     |
| 35 |                                                                     |     |                                                                                                                                                                                                                                                                                                                                                                                                              |                     |
| 36 |                                                                     |     |                                                                                                                                                                                                                                                                                                                                                                                                              |                     |
| 37 |                                                                     |     |                                                                                                                                                                                                                                                                                                                                                                                                              |                     |
| 38 |                                                                     |     |                                                                                                                                                                                                                                                                                                                                                                                                              |                     |
| 39 |                                                                     | 18b | Plans to promote participant retention and complete follow-up, including list of any outcome data to be collected for participants who discontinue or deviate from intervention protocols                                                                                                                                                                                                                    | <u>11</u>           |
| 40 |                                                                     |     |                                                                                                                                                                                                                                                                                                                                                                                                              |                     |
| 41 |                                                                     |     |                                                                                                                                                                                                                                                                                                                                                                                                              |                     |
| 42 |                                                                     |     |                                                                                                                                                                                                                                                                                                                                                                                                              |                     |

|    |                                 |     |                                                                                                                                                                                                                                                                                                                                       |              |
|----|---------------------------------|-----|---------------------------------------------------------------------------------------------------------------------------------------------------------------------------------------------------------------------------------------------------------------------------------------------------------------------------------------|--------------|
| 1  | Data management                 | 19  | Plans for data entry, coding, security, and storage, including any related processes to promote data quality (eg, double data entry; range checks for data values). Reference to where details of data management procedures can be found, if not in the protocol                                                                     | <u>13</u>    |
| 2  |                                 |     |                                                                                                                                                                                                                                                                                                                                       |              |
| 3  |                                 |     |                                                                                                                                                                                                                                                                                                                                       |              |
| 4  |                                 |     |                                                                                                                                                                                                                                                                                                                                       |              |
| 5  | Statistical methods             | 20a | Statistical methods for analysing primary and secondary outcomes. Reference to where other details of the statistical analysis plan can be found, if not in the protocol                                                                                                                                                              | <u>13-14</u> |
| 6  |                                 |     |                                                                                                                                                                                                                                                                                                                                       |              |
| 7  |                                 |     |                                                                                                                                                                                                                                                                                                                                       |              |
| 8  |                                 | 20b | Methods for any additional analyses (eg, subgroup and adjusted analyses)                                                                                                                                                                                                                                                              | <u>N/A</u>   |
| 9  |                                 |     |                                                                                                                                                                                                                                                                                                                                       |              |
| 10 |                                 | 20c | Definition of analysis population relating to protocol non-adherence (eg, as randomised analysis), and any statistical methods to handle missing data (eg, multiple imputation)                                                                                                                                                       | <u>N/A</u>   |
| 11 |                                 |     |                                                                                                                                                                                                                                                                                                                                       |              |
| 12 |                                 |     |                                                                                                                                                                                                                                                                                                                                       |              |
| 13 |                                 |     |                                                                                                                                                                                                                                                                                                                                       |              |
| 14 | <b>Methods: Monitoring</b>      |     |                                                                                                                                                                                                                                                                                                                                       |              |
| 15 |                                 |     |                                                                                                                                                                                                                                                                                                                                       |              |
| 16 | Data monitoring                 | 21a | Composition of data monitoring committee (DMC); summary of its role and reporting structure; statement of whether it is independent from the sponsor and competing interests; and reference to where further details about its charter can be found, if not in the protocol. Alternatively, an explanation of why a DMC is not needed | <u>13</u>    |
| 17 |                                 |     |                                                                                                                                                                                                                                                                                                                                       |              |
| 18 |                                 |     |                                                                                                                                                                                                                                                                                                                                       |              |
| 19 |                                 |     |                                                                                                                                                                                                                                                                                                                                       |              |
| 20 |                                 |     |                                                                                                                                                                                                                                                                                                                                       |              |
| 21 |                                 |     |                                                                                                                                                                                                                                                                                                                                       |              |
| 22 |                                 | 21b | Description of any interim analyses and stopping guidelines, including who will have access to these interim results and make the final decision to terminate the trial                                                                                                                                                               | <u>N/A</u>   |
| 23 |                                 |     |                                                                                                                                                                                                                                                                                                                                       |              |
| 24 |                                 |     |                                                                                                                                                                                                                                                                                                                                       |              |
| 25 | Harms                           | 22  | Plans for collecting, assessing, reporting, and managing solicited and spontaneously reported adverse events and other unintended effects of trial interventions or trial conduct                                                                                                                                                     | <u>13</u>    |
| 26 |                                 |     |                                                                                                                                                                                                                                                                                                                                       |              |
| 27 |                                 |     |                                                                                                                                                                                                                                                                                                                                       |              |
| 28 | Auditing                        | 23  | Frequency and procedures for auditing trial conduct, if any, and whether the process will be independent from investigators and the sponsor                                                                                                                                                                                           | <u>13</u>    |
| 29 |                                 |     |                                                                                                                                                                                                                                                                                                                                       |              |
| 30 |                                 |     |                                                                                                                                                                                                                                                                                                                                       |              |
| 31 |                                 |     |                                                                                                                                                                                                                                                                                                                                       |              |
| 32 | <b>Ethics and dissemination</b> |     |                                                                                                                                                                                                                                                                                                                                       |              |
| 33 |                                 |     |                                                                                                                                                                                                                                                                                                                                       |              |
| 34 | Research ethics approval        | 24  | Plans for seeking research ethics committee/institutional review board (REC/IRB) approval                                                                                                                                                                                                                                             | <u>7</u>     |
| 35 |                                 |     |                                                                                                                                                                                                                                                                                                                                       |              |
| 36 |                                 |     |                                                                                                                                                                                                                                                                                                                                       |              |
| 37 | Protocol amendments             | 25  | Plans for communicating important protocol modifications (eg, changes to eligibility criteria, outcomes, analyses) to relevant parties (eg, investigators, REC/IRBs, trial participants, trial registries, journals, regulators)                                                                                                      | <u>7</u>     |
| 38 |                                 |     |                                                                                                                                                                                                                                                                                                                                       |              |
| 39 |                                 |     |                                                                                                                                                                                                                                                                                                                                       |              |
| 40 |                                 |     |                                                                                                                                                                                                                                                                                                                                       |              |
| 41 |                                 |     |                                                                                                                                                                                                                                                                                                                                       |              |
| 42 |                                 |     |                                                                                                                                                                                                                                                                                                                                       |              |

|    |                               |     |                                                                                                                                                                                                                                                                                     |                          |
|----|-------------------------------|-----|-------------------------------------------------------------------------------------------------------------------------------------------------------------------------------------------------------------------------------------------------------------------------------------|--------------------------|
| 1  | Consent or assent             | 26a | Who will obtain informed consent or assent from potential trial participants or authorised surrogates, and how (see Item 32)                                                                                                                                                        | <u>7</u>                 |
| 2  |                               |     |                                                                                                                                                                                                                                                                                     |                          |
| 3  |                               |     |                                                                                                                                                                                                                                                                                     |                          |
| 4  |                               | 26b | Additional consent provisions for collection and use of participant data and biological specimens in ancillary studies, if applicable                                                                                                                                               | <u>7</u>                 |
| 5  |                               |     |                                                                                                                                                                                                                                                                                     |                          |
| 6  |                               |     |                                                                                                                                                                                                                                                                                     |                          |
| 7  | Confidentiality               | 27  | How personal information about potential and enrolled participants will be collected, shared, and maintained in order to protect confidentiality before, during, and after the trial                                                                                                | <u>12</u>                |
| 8  |                               |     |                                                                                                                                                                                                                                                                                     |                          |
| 9  |                               |     |                                                                                                                                                                                                                                                                                     |                          |
| 10 | Declaration of interests      | 28  | Financial and other competing interests for principal investigators for the overall trial and each study site                                                                                                                                                                       | <u>17</u>                |
| 11 |                               |     |                                                                                                                                                                                                                                                                                     |                          |
| 12 |                               |     |                                                                                                                                                                                                                                                                                     |                          |
| 13 | Access to data                | 29  | Statement of who will have access to the final trial dataset, and disclosure of contractual agreements that limit such access for investigators                                                                                                                                     | <u>13</u>                |
| 14 |                               |     |                                                                                                                                                                                                                                                                                     |                          |
| 15 |                               |     |                                                                                                                                                                                                                                                                                     |                          |
| 16 |                               |     |                                                                                                                                                                                                                                                                                     |                          |
| 17 | Ancillary and post-trial care | 30  | Provisions, if any, for ancillary and post-trial care, and for compensation to those who suffer harm from trial participation                                                                                                                                                       | <u>N/A</u>               |
| 18 |                               |     |                                                                                                                                                                                                                                                                                     |                          |
| 19 |                               |     |                                                                                                                                                                                                                                                                                     |                          |
| 20 | Dissemination policy          | 31a | Plans for investigators and sponsor to communicate trial results to participants, healthcare professionals, the public, and other relevant groups (eg, via publication, reporting in results databases, or other data sharing arrangements), including any publication restrictions | <u>15-16</u>             |
| 21 |                               |     |                                                                                                                                                                                                                                                                                     |                          |
| 22 |                               |     |                                                                                                                                                                                                                                                                                     |                          |
| 23 |                               |     |                                                                                                                                                                                                                                                                                     |                          |
| 24 |                               | 31b | Authorship eligibility guidelines and any intended use of professional writers                                                                                                                                                                                                      | <u>N/A</u>               |
| 25 |                               |     |                                                                                                                                                                                                                                                                                     |                          |
| 26 |                               | 31c | Plans, if any, for granting public access to the full protocol, participant-level dataset, and statistical code                                                                                                                                                                     | <u>N/A</u>               |
| 27 |                               |     |                                                                                                                                                                                                                                                                                     |                          |
| 28 |                               |     |                                                                                                                                                                                                                                                                                     |                          |
| 29 | <b>Appendices</b>             |     |                                                                                                                                                                                                                                                                                     |                          |
| 30 |                               |     |                                                                                                                                                                                                                                                                                     |                          |
| 31 | Informed consent materials    | 32  | Model consent form and other related documentation given to participants and authorised surrogates                                                                                                                                                                                  | <u>N/A</u>               |
| 32 |                               |     |                                                                                                                                                                                                                                                                                     |                          |
| 33 |                               |     |                                                                                                                                                                                                                                                                                     |                          |
| 34 | Biological specimens          | 33  | Plans for collection, laboratory evaluation, and storage of biological specimens for genetic or molecular analysis in the current trial and for future use in ancillary studies, if applicable                                                                                      | <u>12-13 and Table 2</u> |
| 35 |                               |     |                                                                                                                                                                                                                                                                                     |                          |
| 36 |                               |     |                                                                                                                                                                                                                                                                                     |                          |

\*It is strongly recommended that this checklist be read in conjunction with the SPIRIT 2013 Explanation & Elaboration for important clarification on the items. Amendments to the protocol should be tracked and dated. The SPIRIT checklist is copyrighted by the SPIRIT Group under the Creative Commons "[Attribution-NonCommercial-NoDerivs 3.0 Unported](https://creativecommons.org/licenses/by-nc-nd/3.0/)" license.

# BMJ Open

## Rationale and design of The Self-TI Study protocol: a cross-sectional human papillomavirus self-testing pilot study among transgender adults in England

|                                 |                                                                                                                                                                                                                                                                                                         |
|---------------------------------|---------------------------------------------------------------------------------------------------------------------------------------------------------------------------------------------------------------------------------------------------------------------------------------------------------|
| Journal:                        | <i>BMJ Open</i>                                                                                                                                                                                                                                                                                         |
| Manuscript ID                   | bmjopen-2024-086099.R2                                                                                                                                                                                                                                                                                  |
| Article Type:                   | Protocol                                                                                                                                                                                                                                                                                                |
| Date Submitted by the Author:   | 17-Jun-2024                                                                                                                                                                                                                                                                                             |
| Complete List of Authors:       | Jackson, Sarah ; National Cancer Institute<br>O'Callaghan, Stewart; OUTPatients<br>Ward, Elanore; Cambridge University Hospitals NHS Foundation Trust<br>Orkin, Chloe; Queen Mary University of London<br>Clarke, Megan; National Cancer Institute<br>Bernier, Alison ; Queen Mary University of London |
| <b>Primary Subject Heading</b>: | Sexual health                                                                                                                                                                                                                                                                                           |
| Secondary Subject Heading:      | Infectious diseases, Oncology, Obstetrics and gynaecology, Public health                                                                                                                                                                                                                                |
| Keywords:                       | Human Papillomavirus Viruses, Transgender Persons, Uterine Cervical Neoplasms, Health Equity                                                                                                                                                                                                            |
|                                 |                                                                                                                                                                                                                                                                                                         |

SCHOLARONE™  
Manuscripts

1  
2  
3 **Rationale and design of The Self-TI Study protocol: a cross-sectional human**  
4 **papillomavirus self-testing pilot study among transgender adults in England**  
5  
6

7 Sarah S. Jackson,<sup>1\*</sup> Stewart O'Callaghan,<sup>2</sup> Elanore Ward,<sup>3</sup> Chloe Orkin,<sup>4</sup> Megan A.  
8 Clarke,<sup>1</sup> and Alison May Berner<sup>5</sup>  
9  
10

11  
12  
13  
14 **Affiliations:**

15 <sup>1</sup>Division of Cancer Epidemiology and Genetics, National Cancer Institute, Rockville, MD, USA

16 <sup>2</sup>OUTpatients, London, England

17 <sup>3</sup>Cambridge University Hospitals NHS Foundation Trust, Cambridge, England.

18 <sup>4</sup>Blizard Institute, Faculty of Medicine and Dentistry, Queen Mary University of London, London,  
19 England

20 <sup>5</sup>Barts Cancer Institute, Queen Mary University of London, London, England  
21  
22  
23  
24  
25  
26

27 \*Corresponding author:

28 Sarah S. Jackson, PhD, MPH

29 Infections and Immunoepidemiology Branch

30 Division of Cancer Epidemiology and Genetics

31 National Cancer Institute

32 Rockville, MD 20850

33 Sarah.jackson@nih.gov  
34  
35  
36  
37  
38  
39  
40  
41  
42  
43  
44  
45  
46  
47  
48  
49  
50

51 **Word count:** Abstract: 334; Text: 3,592; Tables: 2; Figures: 1; Supplemental files: 1  
52

53 **Key words:** human papillomavirus, HPV, transgender and non-binary, cancer  
54 screening, cervical cancer, anal cancer  
55  
56  
57  
58



## Abstract

**Introduction:** Persistent infection with high-risk human papillomavirus (HPV) is the causal agent of several cancers including cervical, anal, and oropharyngeal cancer. Transgender men and transmasculine non-binary (TMNB) people with a cervix are much less likely to undergo cervical cancer screening than cisgender women.

Transgender women and transfeminine non-binary (TWNB) people assigned male at birth may be at increased risk of HPV. Both TMNB and TWNB people face many barriers to HPV testing including medical mistrust due to stigma and discrimination.

**Methods and analysis:** The Self-TI Study (Self-TI) is a pilot study designed to measure acceptability and feasibility of HPV self-testing among transgender and non-binary people in England. TMNB people aged 25–65, with at least one year of testosterone and TWNB people, aged 18 and over are eligible to participate. Participants self-collect up to four samples: an oral rinse, a first void urine sample, a vaginal swab (if applicable), and an anal swab. TMNB participants are asked to have an additional clinician-collected cervical swab taken following their routine Cervical Screening Programme sample. TWNB are asked to take a self-collection kit to perform additional self-collection at home and mail the samples back to the clinic. Acceptability is assessed by a self-administered online survey and feasibility is measured as the proportion of samples returned in the clinic and from home.

**Ethics and dissemination:** Self-TI received ethical approval from the Regulatory Ethics Committee of Wales 4 (Wales REC 4) and Ethical Review Panel within the Division of Cancer Epidemiology and Genetics at the US National Cancer Institute. Self-TI was co-produced by members of the transgender and non-binary community, who

1  
2  
3 served as authors, collaborators, and members of the patient and public involvement  
4 (PPI) group. Results of this study will be shared with the community prior to being  
5  
6 published in peer-reviewed journals and the PPI group will help to design the results  
7  
8 dissemination strategy. The evidence generated from this pilot study could be used to  
9  
10 inform a larger, international study of HPV self-testing in the transgender and non-binary  
11  
12 community.  
13  
14  
15

16  
17  
18 **Trial registration number:** NCT05883111  
19

### 20 21 **Strengths and Limitations**

- 22  
23  
24 • The pilot study addresses the lack of evidence around acceptability of human  
25  
26 papillomavirus (HPV) self-sampling in transgender and non-binary people and  
27  
28 was co-designed with community members.  
29
- 30  
31 • This pilot study collects samples from four body sites including an oral rinse, a  
32  
33 urine sample, a vaginal swab, and an anal swab to assess correlation between  
34  
35 samples.  
36
- 37  
38 • This pilot study examines the concordance between self-collected and clinician-  
39  
40 collected samples.  
41
- 42  
43 • This pilot study offers participants an at-home collection kit to assess the  
44  
45 feasibility of HPV testing at home.  
46
- 47  
48 • The generalizability of study findings is limited due to the convenience sampling  
49  
50 of participants.  
51  
52  
53  
54  
55  
56  
57  
58  
59  
60

## 1 INTRODUCTION

2 Persistent infection with one of 12 high-risk human papillomavirus (HPV) genotypes is  
3 the causative agent of several cancers including cervical, anogenital, and  
4 oropharyngeal.<sup>1</sup> The widespread implementation of cervical cancer screening with Pap  
5 cytology or HPV testing, combined with HPV vaccination, has greatly reduced cervical  
6 cancer incidence and mortality.<sup>2</sup> Consensus guidelines for anal cancer screening now  
7 include transgender women.<sup>3 4</sup>

8 Transgender men and transmasculine non-binary (TMNB) adults (those who  
9 were registered female at birth and have a masculine or non-binary gender identity) are  
10 less likely to have ever undergone cervical cancer screening than cisgender women.<sup>5 6</sup>  
11 As many as one third of TMNB adults are not up-to-date with recommended screening  
12 guidelines.<sup>7 8</sup> Among those screened, TMNB patients are eight times more likely than  
13 cisgender women to have an inadequate Pap where the test cannot be evaluated for a  
14 variety of reasons such as lack of sufficient cellularity or bleeding resulting from  
15 testosterone induced cervical and vaginal atrophy.<sup>9</sup> TMNB adults face many additional  
16 barriers to cervical cancer screening than cisgender people, including an increased  
17 likelihood of discrimination in medical settings.<sup>10-12</sup> During gynecologic exams, TMNB  
18 patients may experience gender dysphoria (distress associated with the incongruence  
19 between gender identity and sex registered at birth) due to the focus on genitalia and  
20 the gendered nature of cervical cancer screening, such as feminine waiting rooms and  
21 expectations of gender conformity.<sup>13-15</sup> Clinicians may also erroneously believe that  
22 TMNB are not a risk for HPV due to incorrect assumptions about TMNB anatomy and

1  
2  
3 23 sexual practices, and are less likely to recommend screening.<sup>14</sup> Further, TMNB patients  
4  
5 24 may be less likely to be vaccinated against HPV than cisgender women.<sup>16</sup>  
6  
7

8 25 Transgender women and transfeminine non-binary (TWNB) adults (those who  
9  
10 26 were registered male at birth and have a female or non-binary gender identity) may be  
11  
12 27 at increased risk of HPV infection compared to cisgender individuals. England began a  
13  
14 28 national HPV immunisation programme for adolescent girls with the bivalent HPV  
15  
16 29 vaccine in 2008, switching to the quadrivalent in 2012 and the nonavalent in 2021.<sup>17 18</sup>  
17  
18  
19 30 The UK implemented a gender-neutral vaccination program in 2019 with a catch-up  
20  
21 31 programme for people up to the age of 45 years who are considered high risk for HPV  
22  
23 32 (e.g., men who have sex with men).<sup>19</sup> Though transgender and non-binary people may  
24  
25 33 be eligible for vaccination through the catch-up programme, barriers to healthcare and  
26  
27 34 lack of perceived risk means that many TWNB adults may still be unvaccinated.<sup>20</sup>  
28  
29 35 Additionally, co-infection with HIV, which may be elevated among TWNB adults  
30  
31 36 compared to the general population,<sup>21</sup> increases the risk of persistent HPV infection<sup>22-24</sup>  
32  
33 37 and HPV associated cancers.<sup>25 26</sup> One small US study reported a study HPV prevalence  
34  
35 38 of 89% in anal and 9% in oral specimens from TWNB adults.<sup>27</sup> A Brazilian study of 268  
36  
37 39 transgender women reported a study prevalence to be 77% in anal, 34% in genital, and  
38  
39 40 11% oral specimens.<sup>28</sup> Studies from both The Netherlands and Thailand estimate a  
40  
41 41 20% prevalence of neovaginal high-risk HPV, though these two studies had a high  
42  
43 42 proportion of invalid HPV results, suggesting the true prevalence may be higher.<sup>29 30</sup>  
44  
45 43 The oncogenic potential of persistent high-risk HPV infection in the vagina of TWNB is  
46  
47 44 poorly understood and current guidelines do not recommend screening for this  
48  
49  
50  
51  
52  
53  
54  
55  
56  
57  
58  
59  
60

1  
2  
3 45 population.<sup>31</sup> Both low- and high-grade squamous intraepithelial lesions have been  
4  
5 46 reported in the vagina of TWNB adults but incidence data is lacking.<sup>32 33</sup>  
6  
7

8 47 Prior research conducted in cisgender women (largely from high-income  
9  
10 48 countries) has shown that self-sampling for HPV with PCR-based assays has  
11  
12 49 comparable performance to clinician-collected samples for the detection of cervical  
13  
14 50 HPV.<sup>34 35</sup> Limited research suggests that most TMNB patients may prefer HPV testing  
15  
16 51 by self-collection,<sup>36 37</sup> though patients have expressed concern about the lack of  
17  
18 52 evidence-based guidelines specific to TMNB to inform their preference.<sup>36 38</sup> Indeed, only  
19  
20 53 one small study<sup>39</sup> has compared the performance of clinician- and self-collected  
21  
22 54 samples in TMNB, showing good concordance; however more research is needed to  
23  
24 55 assess whether this is an acceptable approach for cervical screening in TMNB. Reisner  
25  
26 56 *et al.*<sup>40</sup> found a study HPV prevalence of 16% among 130 TM participants and that HPV  
27  
28 57 testing by self-sample showed good concordance with clinician-collected samples.  
29  
30  
31 58 Similarly, one US study that included TWNB adults found that people were more likely  
32  
33 59 to engage in anal cancer screening with an at-home self-collection kit than attend a  
34  
35 60 clinician-collected screening appointment.<sup>41</sup>  
36  
37  
38  
39

40 61 We present the protocol for Self-TI, a pilot study whose objective is to assess the  
41  
42 62 feasibility and acceptability of HPV self-testing at four body sites among TMNB and  
43  
44 63 TWNB adults.  
45

## 46 64 **METHODS AND ANALYSIS**

### 47 65 **Study design and setting**

48  
49 66 The Self-TI Study (Self-TI) is a pilot study examining the acceptability and  
50  
51 67 feasibility of HPV self-testing among transgender and non-binary people conducted in  
52  
53  
54  
55  
56  
57  
58  
59  
60

1  
2  
3 68 England (IRAS# 319364 and clinicaltrials.gov NCT05883111). The study received  
4  
5 69 ethical approval from the Research Ethics Committee (REC) of Wales 4 (Wales REC 4,  
6  
7 70 #23/WA/0266) and the Ethical Review Panel within the Division of Cancer Epidemiology  
8  
9 71 and Genetics at the US National Cancer Institute (NCI) (#3G009-05). Amendments to  
10  
11 72 the protocol and study materials are approved by the REC and the protocol was last  
12  
13 73 revised on January 23, 2024 (4<sup>th</sup> revision). Before taking part in this pilot study, all  
14  
15 74 participants provide informed written consent to participate to the study staff.  
16  
17 75 Participants are asked if they consent to future use of their research specimens;  
18  
19 76 otherwise specimens will be destroyed after the aims of the study protocol are met.  
20  
21  
22  
23

#### 24 77 **Study setting and participant recruitment**

25  
26 78 Enrolment began in February 2024 and will continue for one year. Self-TI seeks  
27  
28 79 to enroll 50 participants who identify as TMNB with a cervix and 50 participants who  
29  
30 80 identify as TWNB assigned male at birth. Participants are recruited at one of three  
31  
32 81 clinical sites in England: CliniQ or Ambrose Kings sexual health clinics in London, or  
33  
34 82 Clinic-T in Brighton. These sites were chosen as they are in areas with large  
35  
36 83 transgender and non-binary populations, their providers are specialists in transgender  
37  
38 84 and non-binary sexual health, and the clinic staff have experience conducting research  
39  
40 85 studies. Participants can be recruited and pre-screened for study eligibility when they  
41  
42 86 book an appointment for a cervical cancer screening (TMNB study group only) or a  
43  
44 87 sexual health screening (TWNB study group only). Recruitment occurs through  
45  
46 88 advertisement posters and banners placed in the clinics, and flyers placed in gender  
47  
48 89 identity clinics and general practitioners' offices known to have transgender and non-  
49  
50 90 binary patients. Self-TI has created a website ([www.self-ti.com](http://www.self-ti.com)), which contains  
51  
52  
53  
54  
55  
56  
57  
58  
59  
60

1  
2  
3 91 information on the study, HPV and cancer education, and links to contact the study sites  
4  
5 92 to enrol. Self-TI also commissioned a well-known trans activist and artist in England, to  
6  
7 93 record a 45 second advertisement video. This video is posted the activist's social media  
8  
9 94 sites (Twitter, Instagram, and Tik Tok), other LGBTQ+ cancer charities in England, and  
10  
11 95 the Self-TI's website and social media sites. The Standard Protocol Items:  
12  
13  
14 96 Recommendations for Interventional Trials (SPIRIT) checklist is available as an online  
15  
16 97 supplemental file.<sup>42</sup>  
17  
18

## 19 98 **Participants**

20  
21 99 Individuals who identify as TMNB with a cervix, aged 25–65, with at least one  
22  
23 100 year of self-reported testosterone therapy, are eligible to participate in the TMNB study  
24  
25 101 group. Testosterone exposure is a requirement of study participation as it is associated  
26  
27 102 with vaginal atrophy such that speculum and swab insertion to the recommended depth  
28  
29 103 could be painful, unpleasant, or necessitate additional lubricant affecting the accuracy  
30  
31 104 and acceptability of clinician- and self-collected HPV testing.<sup>9 40</sup> Individuals who identify  
32  
33 105 as TWNB, aged 18 and over, are eligible to participate in the TWNB study group. TWNB  
34  
35 106 participants with a vagina are preferentially selected into the study, with the first three  
36  
37 107 months of enrolment restricted to individuals who had undergone vaginoplasty. After  
38  
39 108 three months, the study team will evaluate whether it is feasible to reach the targeted  
40  
41 109 sample size with this restriction and if not, the eligibility criterion will be removed.  
42  
43 110 Individuals with a vagina must have undergone vaginoplasty greater than one year prior  
44  
45 111 to entering the study due to safety concerns over self-sampling on recently healed  
46  
47 112 epithelium. All participants are given a participant information sheet, which is discussed  
48  
49 113 with study staff as part of informed consent procedures.  
50  
51  
52  
53  
54  
55  
56  
57  
58  
59  
60

## 114 Data collection

115 Study activities and timeline are presented in Table 1 and Figure 1. After giving  
 116 consent, participants fill out demographics and medical history questionnaires. The  
 117 demographics form asks for sexual orientation, race and ethnicity, and height and  
 118 weight. The medical history form asks about previous cancer screening, previous  
 119 cancer diagnoses, HPV vaccination, hormone therapy, and HIV status. Study staff  
 120 review these questionnaires with the participants to make sure they are complete and to  
 121 answer any questions the participants have.

**Table 1. Study activities and timeline**

| Study procedure          | Prior to Day 1 |                  | In Clinic Day 1  |               | At Home<br>≤ 4 weeks<br>(TWNB only) |
|--------------------------|----------------|------------------|------------------|---------------|-------------------------------------|
|                          | Screening      | Clinician        | Self-Sampling    | Self-Sampling |                                     |
| Eligibility assessment   | X              |                  |                  |               |                                     |
| Informed consent         |                |                  | X                |               |                                     |
| Demographics             |                |                  | X                |               |                                     |
| Medical history          |                |                  | X                |               |                                     |
| Vaginal swab             |                |                  | X*               |               | X*                                  |
| Anal swab                |                |                  | X                |               | X                                   |
| Oral rinse               |                |                  | X                |               | X                                   |
| Urine                    |                |                  | X                |               |                                     |
| Cervical swab            |                | X<br>(TMNB only) |                  |               |                                     |
| Survey                   |                |                  | X<br>(TMNB only) |               | X                                   |
| Adverse event assessment |                | X                | X                |               | X                                   |

\*All TMNB and only TWNB who have undergone vaginoplasty.

Abbreviations: TMNB = transmasculine and non-binary people with a cervix; TWNB= trans women and non-binary people assigned male at birth

122

## 123 Sampling



124 All participants are asked to self-collect samples in the clinic in the following  
 125 order: oral rinse, urine, vagina, and anus (collection materials are provided in Table 2).  
 126 Each participant will receive a self-sampling kit with written instructions for self-  
 127 collection that includes a QR code linked to an instructional video. Study staff will also  
 128 explain the self-collection procedures to the participants.

**Table 2. Collection materials of study specimens**

| Specimen Type       | Collection Method                                                    |
|---------------------|----------------------------------------------------------------------|
| Vaginal/neo-vaginal | Evalyn® Brush (Rovers® Medical, Belgium) or Dacron swab (DuPont, US) |
| Anal                | FLOQSwab (COPAN Diagnostics Inc., US)                                |
| Oral rinse          | Scope (Proctor and Gamble, US)                                       |
| Urine               | Colli-Pee (Novosanis, Belgium)                                       |
| Cervical            | Endocervical broom (Hologic, US)                                     |

129  
 130 The participants use Scope mouthwash (Proctor and Gamble, US) to collect  
 131 buccal cells and a Colli-pee® collection device (Novosanis, Belgium) to collect first void  
 132 urine (Table 2). The Colli-pee® device was selected as it has been used successfully by  
 133 sexual and gender minority participants in other studies and can accommodate a variety  
 134 of genital anatomies.

135 For the vaginal sample, participants have a choice to use either an Evalyn  
 136 Brush® (Rovers Medical, Belgium) or a Dacron swab (DuPont, US) (Table 2), if  
 137 applicable. The Evalyn Brush® was chosen for several features which make it easier to  
 138 use for populations unfamiliar with self-sampling. It has wings to guide the participant as  
 139 to how far they should insert the device, a plunger which releases the bristle brush to  
 140 the cervix and clicks to aid in the counting of the rotations. Participants who prefer a  
 141 slimmer vaginal swab are provided with a Dacron swab upon request (Table 2).  
 142 Participants use a FLOQSwab® (COPAN Diagnostics Inc., US) to collect the anal

1  
2  
3 143 sample (Table 2). The choice of sampling methods was based on a review of previous  
4  
5 144 studies that examined the same body sites and concordance between in-clinic and at-  
6  
7  
8 145 home sampling methods<sup>43 44</sup>, though the mailing of dry swabs without transport media  
9  
10 146 may affect anal specimen adequacy, especially if fecal matter is present.<sup>45</sup>

11  
12 147 After the self-administered samples are collected, TMNB participants have a  
13  
14 148 pelvic exam as part of the standard cervical cancer screening. In England, individuals  
15  
16  
17 149 with a cervix are invited to participate in the National Cervical Screening Programme  
18  
19 150 (CSP) every 3 years for those between the ages of 25-49 and every 5 years for those  
20  
21 151 between the ages of 50-65. Screening is conducted with a primary HPV test and if  
22  
23  
24 152 positive, a reflex cervical sample is sent for cytology. Self-TI is paired with the CSP so  
25  
26 153 that TMNB individuals do not need to undergo pelvic exams more than once. In Self-TI,  
27  
28 154 the clinician will take two cervical swabs; the first for the (CSP) sent to the National  
29  
30 155 Health Service (NHS) laboratories, and the second for the clinician-collected sample for  
31  
32 156 Self-TI using an endocervical broom (Hologic, US). The CSP sample is collected first so  
33  
34  
35 157 that if the participant declines further samples the standard of care is met.

36  
37  
38 158 After TWNB participants collect their self-administered samples, they will be  
39  
40 159 given a kit to complete a second vaginal (if applicable), anal, and oral rinse sampling at  
41  
42 160 home. Once collected, the participant places the dry brushes and samples in the pre-  
43  
44 161 addressed, postage paid mailer provided before dropping it in the post within one month  
45  
46  
47 162 of their first study visit. The kit includes written instructions with a QR code linked to an  
48  
49 163 instructional video. Study staff follow up with TWNB study participants on a weekly  
50  
51 164 basis for up to four weeks to ensure the return of their study samples.

### 52 53 54 165 **Self-administered online survey**

55  
56  
57  
58  
59  
60

1  
2  
3 166 After self-collection, participants take a self-administered online survey, which  
4  
5 167 takes approximately 20–25 minutes to complete. The survey includes questions on  
6  
7 168 based on previously validated surveys that capture sensitive demographic  
8  
9  
10 169 characteristics, acceptability of self-sampling (e.g., physical and emotional comfort,  
11  
12 170 confidence in collection), comparing self-collected to clinician-collected sampling (TMNB  
13  
14 171 study group only),<sup>39</sup> comparing self-collected sampling in the clinic to at-home collection  
15  
16 172 (TWNB study group only), history of HPV vaccination, knowledge of HPV,<sup>39</sup> comparing  
17  
18 173 self-collected to clinician-collected sampling (TMNB study group only), medical  
19  
20 174 mistrust,<sup>46</sup> and sexual history.<sup>39 47</sup> comparing self-collected sampling in the clinic to at-  
21  
22 175 home collection (TWNB study group only), history of HPV vaccination, knowledge of  
23  
24 176 HPV,<sup>15</sup> medical mistrust,<sup>46</sup> and sexual history.<sup>47</sup> Participants receive a £20 gift card to a  
25  
26 177 large online retailer, as remuneration for their participation in Self-TI.  
27  
28  
29

### 30 178 **Outcomes**

31  
32  
33 179 The primary study outcomes are the acceptability and feasibility of self-sampling  
34  
35 180 among participants that will inform a larger study. Acceptability is measured by the  
36  
37 181 physical and emotional responses to self-sampling for each collection method using a 7-  
38  
39 182 point Likert scale. Feasibility is measured by the proportion of specimens returned from  
40  
41 183 self-collection in the clinic and those mailed from home.  
42  
43

44 184 This pilot study will also estimate the study prevalence of HPV (positivity and  
45  
46 185 genotype) and the correlation of HPV detection between the four self-collected samples.  
47  
48 186 The concordance between the vaginal self-collected sample and clinician-collected  
49  
50 187 cervical sample will be estimated among TMNB. Among TWNB, we will estimate the  
51  
52 188 correlation between the samples collected by participants in the clinic with the samples  
53  
54  
55  
56  
57  
58  
59  
60

1  
2  
3 189 collected at home. Finally, Self-TI will collect exploratory data on risk factors associated  
4  
5 190 with HPV prevalence, which can be fully assessed in a larger trial.  
6

### 7 191 **HPV testing**

8  
9  
10 192 The cervical, vaginal, and anal swabs are reconstituted in a plastic vial with  
11  
12 193 PreservCyt transport medium (ThinPrep PreserveCyt Solution, Hologic, US) before  
13  
14 194 freezing at -80°C. Oral and urine samples are placed directly into -80°C. Samples are  
15  
16  
17 195 shipped in batches to the Center for Genomic Research (CGR) at NCI. All samples will  
18  
19 196 be tested using a next-generation sequencing based-assay (TypeSeq) developed by  
20  
21  
22 197 CGR, which generates a positive/negative result for 51 HPV genotypes.<sup>48</sup>  
23

### 24 198 **Data management**

25  
26 199 Data management and project coordination is done at the Division of Cancer  
27  
28 200 Epidemiology and Genetics at NCI. Study oversight and data management are led by  
29  
30  
31 201 the study chief investigator (AMB) and the statistician (SSJ). Research staff enter de-  
32  
33 202 identified participant data into an electronic data capture system. All participant  
34  
35 203 information (including laboratory data) is confidential and stored in a secure location.  
36  
37 204 Only the personnel listed on the delegation log will have access to participant data; the  
38  
39 205 statistician and laboratory personnel have access to deidentified data only. Participant  
40  
41  
42 206 data are checked at regular intervals for quality assurance. The number of AEs is  
43  
44 207 expected to be very small and thus an independent Data Monitoring Committee was not  
45  
46 208 appointed. However, all adverse events will be collected, and severe adverse events  
47  
48 209 deemed by the chief investigator to be related to study procedures and unexpected, will  
49  
50  
51 210 be reported to the sponsor within 24 hours and to the REC within 15 days of learning of  
52  
53  
54 211 the event.  
55  
56  
57  
58  
59  
60

## 212 **Statistical analysis**

213 Acceptability of self-sampling procedures will be measured on the self-  
214 administered online survey, which uses a 7-point Likert scale with 1 indicating strong  
215 disagreement and 7 indicating strong agreement. Summary measures of these  
216 questions will be reported (average score for each question) separately for each group.  
217 For all participants, feasibility will be measured by the proportion of participants who are  
218 able to complete the self-collection procedures in the clinic. For TWNB participants, at-  
219 home feasibility will be measured by the proportion of TWNB participants who are able  
220 to complete and return all self-collection procedures at home.

221 For our secondary objectives, we will estimate the prevalence of HPV, overall,  
222 and by genotype in each of the self-collected samples from the two groups, separately.  
223 The phi-coefficient and associated *P*-values will be estimated to assess HPV positivity  
224 correlation between the four anatomic sites. Further, we will calculate the Cohen's  
225 kappa statistic as a measure of percent positive agreement of HPV positivity in self-  
226 collected vaginal samples versus the clinician-collected cervical samples among TMNB  
227 and in self-collected in clinic samples versus self-collected at home samples among  
228 TWNB, respectively.

## 229 **Patient and public involvement**

230 A patient and public involvement (PPI) group was formed prior to the submission  
231 of the Self-TI protocol to regulatory bodies. PPI played an important role in the design  
232 and conduct of the study, and participant recruitment. Six group meetings were held  
233 between May 2022–August 2023 with six members. PPI members represented the target  
234 population of Self-TI, including transfeminine, transmasculine, and non-binary

1  
2  
3 235 individuals. Authors SSJ, SOC, and EW attended all meetings, which were led either by  
4  
5 236 SOC or EW who are members of the transgender and non-binary community, and SOC  
6  
7 237 is the founder of a cancer charity for lesbian, gay, bisexual, transgender, intersex, and  
8  
9  
10 238 queer individuals. PPI members reviewed the study protocol, data collection forms,  
11  
12 239 online self-administered survey, advertisement and recruitment plan, instructional video,  
13  
14 240 and results dissemination plan. Meetings were conducted over Zoom in the evenings to  
15  
16 241 accommodate members' schedules and followed up via email to provide additional  
17  
18 242 opportunities for written feedback on materials. Online meetings included short  
19  
20 243 presentations on HPV-related cancer topics given by experts in the field to provide  
21  
22 244 information exchange. PPI members were compensated for their time with multi-retailer  
23  
24 245 gift cards to an amount in line with National Institute for Health Research guidelines.

25  
26  
27  
28 246 Several important suggestions were made by the PPI group and adopted into the  
29  
30 247 study protocol. The standard Evalyn® brush is manufactured in a dark pink color, which  
31  
32 248 was suggested could be off putting to our participants, so we worked with the  
33  
34 249 manufacturers to provide Self-TI with devices in a more neutral blue color. Though the  
35  
36 250 Evalyn® brush has several features that make it ideal for individuals who are not  
37  
38 251 familiar with self-sampling, one drawback is that it is slightly thicker than other swabs  
39  
40 252 used for vaginal sampling. Therefore, it was suggested by the PPI group that  
41  
42 253 participants be provided with a slimmer swab upon request. Additionally, though it is  
43  
44 254 preferred that TMNB participants complete the survey in the clinic after their exam, the  
45  
46 255 PPI group felt that participants should be given the option to complete the survey at  
47  
48 256 home. This change was implemented and TMNB participants can scan or be emailed a  
49  
50 257 QR code to the survey link after leaving the clinic if desired. The group felt that some  
51  
52  
53  
54  
55  
56  
57  
58  
59  
60

1  
2  
3 258 participants would want to leave the clinic immediately after their speculum exam as it  
4  
5 259 may result in increased feelings of dysphoria and can be uncomfortable or painful for  
6  
7  
8 260 some participants.  
9

## 10 261 **ETHICS AND DISSEMINATION**

11  
12 262 People with a male gender marker in their medical record are not invited to  
13  
14 263 participate in the CSP and the laboratory may reject cervical samples from male  
15  
16 264 patients. The chief investigator worked with the laboratories processing CSP samples  
17  
18 265 for Self-TI participants to ensure samples would not be discarded prior to testing. Senior  
19  
20 266 staff (AMB and SSJ) also consulted the US National Institutes of Health Bioethics group  
21  
22 267 about returning study results to the participants. Because the assay under study in Self-  
23  
24 268 TI is a research test and not approved for clinical use in the UK, participants will not  
25  
26 269 have their study results returned to them. Instead, TMNB participants should defer to  
27  
28 270 the HPV result provided by the CSP, as applicable. Further, in cases where the HPV  
29  
30 271 result from Self-TI conflicts with the CSP result or in the absence of a CSP result (as in  
31  
32 272 the case of TWNB samples), senior study staff felt that providing participants with a  
33  
34 273 result that could not be followed up with clinically could cause distress and would be  
35  
36 274 unethical. Only HPV positive results taken from samples as part of the CSP will warrant  
37  
38 275 follow up under the NHS.  
39

40  
41 276 Information gained from this study will be published in peer-reviewed journals  
42  
43 277 and presented at national and international conferences. Prior to scientific  
44  
45 278 dissemination, we will engage with the PPI group in writing the lay results, results  
46  
47 279 dissemination strategy and final publication. The lay summary of the results will be  
48  
49 280 posted to the Self-TI website, participating clinic websites, and the websites of charities  
50  
51  
52  
53  
54  
55  
56  
57  
58  
59  
60

1  
2  
3 281 and organisations supporting trans and non-binary people so that study participants and  
4  
5 282 community members may be notified of the results first at the PPI group's request.  
6  
7  
8 283 Several online webinars are planned to disseminate the results and allow community  
9  
10 284 members to engage in a discussion with the researchers. These webinars will be  
11  
12 285 recorded and posted on the Self-TI website. Finally, data from this pilot study will inform  
13  
14 286 a larger, multi-center, international study.

## 17 287 **DISCUSSION**

19 288 The overarching goal of this pilot study is to provide important insight into the  
20  
21 289 acceptability and feasibility of HPV self-sampling among transgender and gender  
22  
23 290 diverse individuals for a larger study. The pilot study will provide essential data that will  
24  
25 291 inform recruitment, study procedures, and sample size calculations for this larger study.

28 292 A major strength of our study is community involvement from conception to  
29  
30 293 implementation. We included community voices at every stage of protocol development  
31  
32 294 and have had a dedicated PPI group in addition to transgender and non-binary senior  
33  
34 295 study staff advising our study throughout. This strategy has led to improved  
35  
36 296 advertisements, study materials, and outreach efforts. Continued work with community  
37  
38 297 members will help us disseminate study results to a wider audience.

42 298 Potential study limitations include the inability to generalize our results to the  
43  
44 299 wider transgender population in England as we used sexual health clinics in two major  
45  
46 300 cities to recruit our participants. Compared to the general population of transgender  
47  
48 301 individuals, our study participants may be more engaged in care, have greater access to  
49  
50 302 care, and have higher health seeking behaviors. This recruitment strategy was chosen  
51  
52 303 to maximize the proportion of positive HPV tests, to enable recruitment of a reasonable  
53  
54  
55  
56  
57  
58  
59



1  
2  
3 304 sample size in a short amount of time. Our decision to use dry swabs for anal sampling  
4  
5 305 may affect acceptability as dry swabs were reported to cause pain in 19% of users<sup>49</sup> as  
6  
7 306 well as adequacy as the presence of feces was shown to inhibit HPV assays.<sup>45</sup> Finally,  
8  
9  
10 307 the implementation of HPV self-sampling methods and strategies may reduce barriers  
11  
12 308 for transgender and non-binary people in high-resourced areas, but barriers will remain  
13  
14 309 for individuals who live in areas where there is widespread discrimination resulting in a  
15  
16  
17 310 lack of access to culturally appropriate screening.  
18  
19  
20 311

1  
2  
3 **Authors' contributions:** AMB and SSJ conceived, designed, and supervised the study.  
4  
5 SSJ, CO, and AMB were responsible for costings, ethics approval, and study set-up.  
6  
7 AMB and SSJ are responsible for data management. SSJ drafted the manuscript. MC  
8  
9 supervised the HPV methylation assay and provided several methodological  
10  
11 contributions. SOC maintains the study website. SSJ, SOC, and EW oversaw the  
12  
13 coordination of the PPI group. AMB, SSJ, SOC, and EW were responsible for creating  
14  
15 the study survey. All authors revised the manuscript and approved the final draft.  
16  
17

18 **Acknowledgements:** We wish to thank the Self-TI participants, Fox Fisher for  
19  
20 voiceover of the instruction video and study promotion.  
21  
22

23 **Collaborators:** Self-TI Study group: Affiliated with The Caldecot Centre and CliniQ at  
24  
25 King's College Hospital NHS Trust: Ellen Adams, Kate Flanagan, Lucy Campbell, and  
26  
27 Birgit Barbini; Brighton and Howe Sexual Health Clinic: Sophie Ross and Lisa Barbour;  
28  
29 and Ambrose Kings Centre: Chloe Orkin, Kyle Ring and James Hand; Center for  
30  
31 Genomic Research at the National Cancer Institute: Amy Hutchinson and Casey  
32  
33 Dagnell. Special thanks to the members of our PPI group, Fox Fisher, and Emrah Onal.  
34  
35  
36

37 **Funding statement:** Self-TI was funded by the Intramural Research Program of the  
38  
39 Division of Cancer Epidemiology and Genetics at the National Cancer Institute,  
40  
41 Bethesda, MD, US (Grant no.: NA). The PPI group was funded by the Centre for Public  
42  
43 Engagement, Queen Mary University of London (Grant no.: NA).  
44  
45

46 **Sponsorship information:** Queen Mary University of London, Dr Mays Jawad,  
47  
48 Research Governance Operations Manager, Joint Research Management Office,  
49  
50 research.governance@qmul.ac.uk  
51  
52

53 **Sponsors references:** IRAS Number: 319364; Edge Number: 155220  
54  
55  
56  
57  
58  
59

1  
2  
3 **Competing interest statement:** AMB is a trustee of OUTpatients, of which SOC is  
4  
5 CEO. None of the other authors have any conflicts to declare.  
6

7  
8 **Patient and public involvement:** Patients and the community were involved in the  
9  
10 design, conduct, and dissemination plans of this research. Refer to the Methods section  
11  
12 for further details.  
13  
14

15  
16  
17  
18  
19 **Figure 1. Study flow diagram**  
20  
21  
22  
23  
24  
25  
26  
27  
28  
29  
30  
31  
32  
33  
34  
35  
36  
37  
38  
39  
40  
41  
42  
43  
44  
45  
46  
47  
48  
49  
50  
51  
52  
53  
54  
55  
56  
57  
58  
59  
60

## REFERENCES

1. de Martel C, Georges D, Bray F, et al. Global burden of cancer attributable to infections in 2018: a worldwide incidence analysis. *The Lancet Global health* 2019 doi: 10.1016/s2214-109x(19)30488-7 [published Online First: 2019/12/22]
2. Sasieni P, Castanon A, Cuzick J. Effectiveness of cervical screening with age: population based case-control study of prospectively recorded data. *Bmj* 2009;339:b2968. doi: 10.1136/bmj.b2968 [published Online First: 2009/07/28]
3. Stier EA, Clarke MA, Deshmukh AA, et al. International Anal Neoplasia Society's consensus guidelines for anal cancer screening. *International journal of cancer*;n/a(n/a) doi: <https://doi.org/10.1002/ijc.34850>
4. Palefsky JM, Lee JY, Jay N, et al. Treatment of Anal High-Grade Squamous Intraepithelial Lesions to Prevent Anal Cancer. *New England Journal of Medicine* 2022;386(24):2273-82. doi: 10.1056/NEJMoa2201048
5. Stewart T, Lee YA, Damiano EA. Do Transgender and Gender Diverse Individuals Receive Adequate Gynecologic Care? An Analysis of a Rural Academic Center. *Transgend Health* 2020;5(1):50-58. doi: 10.1089/trgh.2019.0037 [published Online First: 2020/04/24]
6. Clark MA, Boehmer U, Rosenthal S. Cancer screening in lesbian and bisexual women and transmen. In: Boehmer U, Elk R, eds. *Cancer and the LGBT Community*. Switzerland: Springer International Publishing 2015:83-98.
7. Peitzmeier SM, Khullar K, Reisner SL, Potter J. Pap test use is lower among female-to-male patients than non-transgender women. *American journal of preventive medicine* 2014;47(6):808-12. doi: 10.1016/j.amepre.2014.07.031 [published Online First: 2014/12/03]
8. Tabaac AR, Sutter ME, Wall CSJ, Baker KE. Gender Identity Disparities in Cancer Screening Behaviors. *American journal of preventive medicine* 2018;54(3):385-93. doi: <https://doi.org/10.1016/j.amepre.2017.11.009>
9. Peitzmeier SM, Reisner SL, Harigopal P, Potter J. Female-to-male patients have high prevalence of unsatisfactory Paps compared to non-transgender females: implications for cervical cancer screening. *J Gen Intern Med* 2014;29(5):778-84. doi: 10.1007/s11606-013-2753-1 [published Online First: 2014/01/16]
10. James SE, Herman JL, Keisling M, et al. *The Report of the 2015 U.S. Transgender Survey*. Washington, D.C.: National Center for Transgender Equality, 2016.
11. Grant JM, Mottet LA, Tanis J, et al. *Injustice at Every Turn: A Report of the National Transgender Discrimination Survey*. Washington, DC: National Center for Transgender Equality and National Gay and Lesbian Task Force, 2011.
12. Seay J, Ranck A, Weiss R, et al. Understanding Transgender Men's Experiences with and Preferences for Cervical Cancer Screening: A Rapid Assessment Survey. *LGBT Health* 2017;4(4):304-09. doi: 10.1089/lgbt.2016.0143 [published Online First: 2017/04/20]
13. Agenor M, Peitzmeier SM, Bernstein IM, et al. Perceptions of cervical cancer risk and screening among transmasculine individuals: patient and provider perspectives. *Cult Health Sex* 2016;18(10):1192-206. doi: 10.1080/13691058.2016.1177203 [published Online First: 2016/05/05]
14. Potter J, Peitzmeier SM, Bernstein I, et al. Cervical Cancer Screening for Patients on the Female-to-Male Spectrum: a Narrative Review and Guide for Clinicians. *J Gen Intern Med* 2015;30(12):1857-64. doi: 10.1007/s11606-015-3462-8 [published Online First: 2015/07/15]

15. Berner AM, Connolly DJ, Pinnell I, et al. Attitudes of transgender men and non-binary people to cervical screening: a cross-sectional mixed-methods study in the UK. *Br J Gen Pract* 2021;71(709):e614-e25. doi: 10.3399/bjgp.2020.0905 [published Online First: 20210729]
16. Brown B, Poteat T, Marg L, Galea JT. Human Papillomavirus-Related Cancer Surveillance, Prevention, and Screening Among Transgender Men and Women: Neglected Populations at High Risk. *LGBT Health* 2017;4(5):315-19. doi: 10.1089/lgbt.2016.0142 [published Online First: 2017/09/07]
17. Public Health England. Human Papillomavirus (HPV) Vaccine Coverage in England, 2008/09 to 2013/14: A review of the full six years of the three-dose schedule 2015 [Available from: [https://assets.publishing.service.gov.uk/media/5c4f232ced915d7d3953d207/HPV\\_Vaccine\\_Coverage\\_in\\_England\\_200809\\_to\\_201314.pdf](https://assets.publishing.service.gov.uk/media/5c4f232ced915d7d3953d207/HPV_Vaccine_Coverage_in_England_200809_to_201314.pdf) accessed January 16 2024.
18. Public Health England. Changes to the vaccine of the HPV immunisation programme 2021 [updated July 27. Available from: [https://assets.publishing.service.gov.uk/media/60feecf38fa8f5043b11e46a/HPV\\_letter\\_changes\\_to\\_the\\_vaccine\\_of\\_the HPV\\_immunisation\\_programme\\_July\\_2021.pdf](https://assets.publishing.service.gov.uk/media/60feecf38fa8f5043b11e46a/HPV_letter_changes_to_the_vaccine_of_the HPV_immunisation_programme_July_2021.pdf).
19. National Health Service. HPV Vaccine 2023 [Available from: <https://www.nhs.uk/conditions/vaccinations/hpv-human-papillomavirus-vaccine/> accessed February 13 2024.
20. Information on HPV vaccination [Available from: <https://www.gov.uk/government/publications/hpv-vaccine-vaccination-guide-leaflet/information-on-hpv-vaccination> accessed August 8 2022.
21. Kirwan P, Hibbert M, Kall M, et al. HIV prevalence and HIV clinical outcomes of transgender and gender-diverse people in England. *HIV Medicine* 2021;22(2):131-39. doi: <https://doi.org/10.1111/hiv.12987>
22. Sun X-W, Kuhn L, Ellerbrock TV, et al. Human papillomavirus infection in women infected with the human immunodeficiency virus. *New England Journal of Medicine* 1997;337(19):1343-49.
23. Strickler HD, Burk RD, Fazzari M, et al. Natural history and possible reactivation of human papillomavirus in human immunodeficiency virus-positive women. *Journal of the National Cancer Institute* 2005;97(8):577-86.
24. Cameron JE, Hagensee ME. Human papillomavirus infection and disease in the HIV+ individual. *Aids-Associated Viral Oncogenesis* 2007:185-213.
25. Chaturvedi AK, Madeleine MM, Biggar RJ, Engels EA. Risk of Human Papillomavirus-Associated Cancers Among Persons With AIDS. *JNCI: Journal of the National Cancer Institute* 2009;101(16):1120-30. doi: 10.1093/jnci/djp205
26. Palefsky JM. Anal squamous intraepithelial lesions: relation to HIV and human papillomavirus infection. *JAIDS Journal of Acquired Immune Deficiency Syndromes* 1999;21:S42-S48.
27. Singh V, Gratzler B, Gorbach PM, et al. Transgender Women Have Higher Human Papillomavirus Prevalence Than Men Who Have Sex With Men—Two U.S. Cities, 2012–2014. *Sexually transmitted diseases* 2019;46(10)
28. de Oliveira BR, Diniz ESBV, Dos Santos KC, et al. Human Papillomavirus Positivity at 3 Anatomical Sites Among Transgender Women in Central Brazil. *Sexually transmitted diseases* 2023;50(9):567-74. doi: 10.1097/olq.0000000000001830 [published Online First: 20230521]
29. van der Sluis WB, Buncamper ME, Bouman MB, et al. Prevalence of Neovaginal High-Risk Human Papillomavirus Among Transgender Women in The Netherlands. *Sexually*

- 1  
2  
3  
4  
5  
6  
7  
8  
9  
10  
11  
12  
13  
14  
15  
16  
17  
18  
19  
20  
21  
22  
23  
24  
25  
26  
27  
28  
29  
30  
31  
32  
33  
34  
35  
36  
37  
38  
39  
40  
41  
42  
43  
44  
45  
46  
47  
48  
49  
50  
51  
52  
53  
54  
55  
56  
57  
58  
59  
60
- transmitted diseases* 2016;43(8):503-5. doi: 10.1097/olq.0000000000000476 [published Online First: 2016/07/16]
30. Uaamnuichai S, Panyakhamlerd K, Suwan A, et al. Neovaginal and Anal High-Risk Human Papillomavirus DNA Among Thai Transgender Women in Gender Health Clinics. *Sexually transmitted diseases* 2021;48(8):547-49. doi: 10.1097/olq.0000000000001388
31. NHS population screening: information for trans and non-binary people. [Available from: <https://www.gov.uk/government/publications/nhs-population-screening-information-for-transgender-people/nhs-population-screening-information-for-trans-people> accessed August 8 2022.
32. Grosse A, Grosse C, Lenggenhager D, et al. Cytology of the neovagina in transgender women and individuals with congenital or acquired absence of a natural vagina. *Cytopathology* 2017;28(3):184-91. doi: 10.1111/cyt.12417 [published Online First: 20170220]
33. Fierz R, Ghisu GP, Fink D. Squamous Carcinoma of the Neovagina after Male-to-Female Reconstruction Surgery: A Case Report and Review of the Literature. *Case Rep Obstet Gynecol* 2019;2019:4820396. doi: 10.1155/2019/4820396 [published Online First: 20190116]
34. Arbyn M, Smith SB, Temin S, et al. Detecting cervical precancer and reaching underscreened women by using HPV testing on self samples: updated meta-analyses. *BMJ* 2018;363:k4823. doi: 10.1136/bmj.k4823 [published Online First: 2018/12/07]
35. Arbyn M, Verdoodt F, Snijders PJ, et al. Accuracy of human papillomavirus testing on self-collected versus clinician-collected samples: a meta-analysis. *Lancet Oncol* 2014;15(2):172-83. doi: 10.1016/S1470-2045(13)70570-9 [published Online First: 2014/01/18]
36. McDowell M, Pardee DJ, Peitzmeier S, et al. Cervical Cancer Screening Preferences Among Trans-Masculine Individuals: Patient-Collected Human Papillomavirus Vaginal Swabs Versus Provider-Administered Pap Tests. *LGBT Health* 2017;4(4):252-59. doi: 10.1089/lgbt.2016.0187 [published Online First: 2017/07/01]
37. Welsh EF, Andrus EC, Sandler CB, et al. Cervicovaginal and anal self-sampling for HPV testing in a transgender and gender diverse population assigned female at birth: comfort, difficulty, and willingness to use. *medRxiv* 2023 doi: 10.1101/2023.08.15.23294132 [published Online First: 20230816]
38. Peitzmeier SM, Agenor M, Bernstein IM, et al. "It Can Promote an Existential Crisis": Factors Influencing Pap Test Acceptability and Utilization Among Transmasculine Individuals. *Qual Health Res* 2017;27(14):2138-49. doi: 10.1177/1049732317725513 [published Online First: 2017/08/25]
39. Reisner SL, Deutsch MB, Peitzmeier SM, et al. Comparing self- and provider-collected swabbing for HPV DNA testing in female-to-male transgender adult patients: a mixed-methods biobehavioral study protocol. *BMC Infect Dis* 2017;17(1):444. doi: 10.1186/s12879-017-2539-x [published Online First: 2017/06/25]
40. Reisner SL, Deutsch MB, Peitzmeier SM, et al. Test performance and acceptability of self-versus provider-collected swabs for high-risk HPV DNA testing in female-to-male trans masculine patients. *PLoS One* 2018;13(3):e0190172. doi: 10.1371/journal.pone.0190172 [published Online First: 2018/03/15]
41. Nyitray AG, Nitkowski J, McAuliffe TL, et al. Home-based self-sampling vs clinician sampling for anal precancer screening: The Prevent Anal Cancer Self-Swab Study. *International journal of cancer* 2023;153(4):843-53. doi: <https://doi.org/10.1002/ijc.34553>

- 1  
2  
3  
4  
5  
6 42. SPIRIT 2013 Statement: Defining Standard Protocol Items for Clinical Trials. *Annals of*  
7 *Internal Medicine* 2013;158(3):200-07. doi: 10.7326/0003-4819-158-3-201302050-00583  
8 %m 23295957
- 9 43. Wolfrum SG, Koutsky LA, Hughes JP, et al. Evaluation of dry and wet transport of at-home  
10 self-collected vaginal swabs for human papillomavirus testing. *Journal of Medical*  
11 *Microbiology* 2012;61(11):1538-45. doi: <https://doi.org/10.1099/jmm.0.046110-0>
- 12 44. Eperon I, Vassilakos P, Navarra I, et al. Randomized comparison of vaginal self-sampling  
13 by standard vs. dry swabs for human papillomavirus testing. *BMC Cancer* 2013;13:353.  
14 doi: 10.1186/1471-2407-13-353 [published Online First: 20130722]
- 15 45. Nitkowski J, Giuliano A, Ridolfi T, et al. Effect of the environment on home-based self-  
16 sampling kits for anal cancer screening. *Journal of Virological Methods*  
17 2022;310:114616. doi: <https://doi.org/10.1016/j.jviromet.2022.114616>
- 18 46. LaVeist TA, Isaac LA, Williams KP. Mistrust of health care organizations is associated with  
19 underutilization of health services. *Health Serv Res* 2009;44(6):2093-105. doi:  
20 10.1111/j.1475-6773.2009.01017.x [published Online First: 20090902]
- 21 47. Johnson A. National Survey of Sexual Attitudes and Lifestyles, 2010–2012. URL:  
22 <https://beta.ukdataservice.ac.uk/datacatalogue/studies/study/2015>
- 23 48. Ben-Batalla I, Vargas-Delgado ME, Meier L, Loges S. Sexual dimorphism in solid and  
24 hematological malignancies. *Semin Immunopathol* 2019;41(2):251-63. doi:  
25 10.1007/s00281-018-0724-7 [published Online First: 2018/10/27]
- 26 49. Weidlich S, Schellberg S, Scholten S, et al. Evaluation of Self-Collected Versus Health Care  
27 Professional (HCP)-Performed Sampling and the Potential Impact on the Diagnostic  
28 Results of Asymptomatic Sexually Transmitted Infections (STIs) in High-Risk Individuals.  
29 *Infectious Disease Reports* 2023;15(5):470-77.  
30  
31  
32  
33  
34  
35  
36  
37  
38  
39  
40  
41  
42  
43  
44  
45  
46  
47  
48  
49  
50  
51  
52  
53  
54  
55  
56  
57  
58  
59  
60

Figure 1. Study Flow

**Transmasculine and non-binary people with a cervix**



**Trans women and non-binary people assigned male at birth**



\*Participants will only collect vaginal samples if they have undergone vaginoplasty





1 **Introduction**

2

3 Background and rationale 6a Description of research question and justification for undertaking the trial, including summary of relevant studies (published and unpublished) examining benefits and harms for each intervention 4-6

4

5

6 6b Explanation for choice of comparators N/A

7

8 Objectives 7 Specific objectives or hypotheses 6

9

10 Trial design 8 Description of trial design including type of trial (eg, parallel group, crossover, factorial, single group), allocation ratio, and framework (eg, superiority, equivalence, noninferiority, exploratory) 6

11

12

13

14 **Methods: Participants, interventions, and outcomes**

15

16 Study setting 9 Description of study settings (eg, community clinic, academic hospital) and list of countries where data will be collected. Reference to where list of study sites can be obtained 6-8

17

18

19 Eligibility criteria 10 Inclusion and exclusion criteria for participants. If applicable, eligibility criteria for study centres and individuals who will perform the interventions (eg, surgeons, psychotherapists) 8

20

21

22

23 Interventions 11a Interventions for each group with sufficient detail to allow replication, including how and when they will be administered 8-12

24

25

26 11b Criteria for discontinuing or modifying allocated interventions for a given trial participant (eg, drug dose change in response to harms, participant request, or improving/worsening disease) N/A

27

28

29 11c Strategies to improve adherence to intervention protocols, and any procedures for monitoring adherence (eg, drug tablet return, laboratory tests) 12

30

31

32 11d Relevant concomitant care and interventions that are permitted or prohibited during the trial N/A

33

34 Outcomes 12 Primary, secondary, and other outcomes, including the specific measurement variable (eg, systolic blood pressure), analysis metric (eg, change from baseline, final value, time to event), method of aggregation (eg, median, proportion), and time point for each outcome. Explanation of the clinical relevance of chosen efficacy and harm outcomes is strongly recommended 12-13

35

36

37

38

39

40 Participant timeline 13 Time schedule of enrolment, interventions (including any run-ins and washouts), assessments, and visits for participants. A schematic diagram is highly recommended (see Figure) 8-12, Table 1

41

42

43

44

45

46

|    |                                                                     |     |                                                                                                                                                                                                                                                                                                                                                                                                              |                     |
|----|---------------------------------------------------------------------|-----|--------------------------------------------------------------------------------------------------------------------------------------------------------------------------------------------------------------------------------------------------------------------------------------------------------------------------------------------------------------------------------------------------------------|---------------------|
| 1  | Sample size                                                         | 14  | Estimated number of participants needed to achieve study objectives and how it was determined, including clinical and statistical assumptions supporting any sample size calculations                                                                                                                                                                                                                        | <u>7</u>            |
| 2  |                                                                     |     |                                                                                                                                                                                                                                                                                                                                                                                                              |                     |
| 3  |                                                                     |     |                                                                                                                                                                                                                                                                                                                                                                                                              |                     |
| 4  | Recruitment                                                         | 15  | Strategies for achieving adequate participant enrolment to reach target sample size                                                                                                                                                                                                                                                                                                                          | <u>7, 8, and 12</u> |
| 5  |                                                                     |     |                                                                                                                                                                                                                                                                                                                                                                                                              |                     |
| 6  |                                                                     |     |                                                                                                                                                                                                                                                                                                                                                                                                              |                     |
| 7  | <b>Methods: Assignment of interventions (for controlled trials)</b> |     |                                                                                                                                                                                                                                                                                                                                                                                                              |                     |
| 8  | Allocation:                                                         |     |                                                                                                                                                                                                                                                                                                                                                                                                              |                     |
| 9  |                                                                     |     |                                                                                                                                                                                                                                                                                                                                                                                                              |                     |
| 10 | Sequence generation                                                 | 16a | Method of generating the allocation sequence (eg, computer-generated random numbers), and list of any factors for stratification. To reduce predictability of a random sequence, details of any planned restriction (eg, blocking) should be provided in a separate document that is unavailable to those who enrol participants or assign interventions                                                     | <u>N/A</u>          |
| 11 |                                                                     |     |                                                                                                                                                                                                                                                                                                                                                                                                              |                     |
| 12 |                                                                     |     |                                                                                                                                                                                                                                                                                                                                                                                                              |                     |
| 13 |                                                                     |     |                                                                                                                                                                                                                                                                                                                                                                                                              |                     |
| 14 |                                                                     |     |                                                                                                                                                                                                                                                                                                                                                                                                              |                     |
| 15 |                                                                     |     |                                                                                                                                                                                                                                                                                                                                                                                                              |                     |
| 16 | Allocation concealment mechanism                                    | 16b | Mechanism of implementing the allocation sequence (eg, central telephone; sequentially numbered, opaque, sealed envelopes), describing any steps to conceal the sequence until interventions are assigned                                                                                                                                                                                                    | <u>N/A</u>          |
| 17 |                                                                     |     |                                                                                                                                                                                                                                                                                                                                                                                                              |                     |
| 18 |                                                                     |     |                                                                                                                                                                                                                                                                                                                                                                                                              |                     |
| 19 |                                                                     |     |                                                                                                                                                                                                                                                                                                                                                                                                              |                     |
| 20 |                                                                     |     |                                                                                                                                                                                                                                                                                                                                                                                                              |                     |
| 21 | Implementation                                                      | 16c | Who will generate the allocation sequence, who will enrol participants, and who will assign participants to interventions                                                                                                                                                                                                                                                                                    | <u>N/A</u>          |
| 22 |                                                                     |     |                                                                                                                                                                                                                                                                                                                                                                                                              |                     |
| 23 |                                                                     |     |                                                                                                                                                                                                                                                                                                                                                                                                              |                     |
| 24 | Blinding (masking)                                                  | 17a | Who will be blinded after assignment to interventions (eg, trial participants, care providers, outcome assessors, data analysts), and how                                                                                                                                                                                                                                                                    | <u>N/A</u>          |
| 25 |                                                                     |     |                                                                                                                                                                                                                                                                                                                                                                                                              |                     |
| 26 |                                                                     |     |                                                                                                                                                                                                                                                                                                                                                                                                              |                     |
| 27 |                                                                     | 17b | If blinded, circumstances under which unblinding is permissible, and procedure for revealing a participant's allocated intervention during the trial                                                                                                                                                                                                                                                         | <u>N/A</u>          |
| 28 |                                                                     |     |                                                                                                                                                                                                                                                                                                                                                                                                              |                     |
| 29 |                                                                     |     |                                                                                                                                                                                                                                                                                                                                                                                                              |                     |
| 30 |                                                                     |     |                                                                                                                                                                                                                                                                                                                                                                                                              |                     |
| 31 | <b>Methods: Data collection, management, and analysis</b>           |     |                                                                                                                                                                                                                                                                                                                                                                                                              |                     |
| 32 |                                                                     |     |                                                                                                                                                                                                                                                                                                                                                                                                              |                     |
| 33 | Data collection methods                                             | 18a | Plans for assessment and collection of outcome, baseline, and other trial data, including any related processes to promote data quality (eg, duplicate measurements, training of assessors) and a description of study instruments (eg, questionnaires, laboratory tests) along with their reliability and validity, if known. Reference to where data collection forms can be found, if not in the protocol | <u>9-12</u>         |
| 34 |                                                                     |     |                                                                                                                                                                                                                                                                                                                                                                                                              |                     |
| 35 |                                                                     |     |                                                                                                                                                                                                                                                                                                                                                                                                              |                     |
| 36 |                                                                     |     |                                                                                                                                                                                                                                                                                                                                                                                                              |                     |
| 37 |                                                                     |     |                                                                                                                                                                                                                                                                                                                                                                                                              |                     |
| 38 |                                                                     |     |                                                                                                                                                                                                                                                                                                                                                                                                              |                     |
| 39 |                                                                     | 18b | Plans to promote participant retention and complete follow-up, including list of any outcome data to be collected for participants who discontinue or deviate from intervention protocols                                                                                                                                                                                                                    | <u>11</u>           |
| 40 |                                                                     |     |                                                                                                                                                                                                                                                                                                                                                                                                              |                     |
| 41 |                                                                     |     |                                                                                                                                                                                                                                                                                                                                                                                                              |                     |
| 42 |                                                                     |     |                                                                                                                                                                                                                                                                                                                                                                                                              |                     |

|    |                                 |     |                                                                                                                                                                                                                                                                                                                                       |              |
|----|---------------------------------|-----|---------------------------------------------------------------------------------------------------------------------------------------------------------------------------------------------------------------------------------------------------------------------------------------------------------------------------------------|--------------|
| 1  | Data management                 | 19  | Plans for data entry, coding, security, and storage, including any related processes to promote data quality (eg, double data entry; range checks for data values). Reference to where details of data management procedures can be found, if not in the protocol                                                                     | <u>13</u>    |
| 2  |                                 |     |                                                                                                                                                                                                                                                                                                                                       |              |
| 3  |                                 |     |                                                                                                                                                                                                                                                                                                                                       |              |
| 4  |                                 |     |                                                                                                                                                                                                                                                                                                                                       |              |
| 5  | Statistical methods             | 20a | Statistical methods for analysing primary and secondary outcomes. Reference to where other details of the statistical analysis plan can be found, if not in the protocol                                                                                                                                                              | <u>13-14</u> |
| 6  |                                 |     |                                                                                                                                                                                                                                                                                                                                       |              |
| 7  |                                 |     |                                                                                                                                                                                                                                                                                                                                       |              |
| 8  |                                 | 20b | Methods for any additional analyses (eg, subgroup and adjusted analyses)                                                                                                                                                                                                                                                              | <u>N/A</u>   |
| 9  |                                 |     |                                                                                                                                                                                                                                                                                                                                       |              |
| 10 |                                 | 20c | Definition of analysis population relating to protocol non-adherence (eg, as randomised analysis), and any statistical methods to handle missing data (eg, multiple imputation)                                                                                                                                                       | <u>N/A</u>   |
| 11 |                                 |     |                                                                                                                                                                                                                                                                                                                                       |              |
| 12 |                                 |     |                                                                                                                                                                                                                                                                                                                                       |              |
| 13 |                                 |     |                                                                                                                                                                                                                                                                                                                                       |              |
| 14 | <b>Methods: Monitoring</b>      |     |                                                                                                                                                                                                                                                                                                                                       |              |
| 15 |                                 |     |                                                                                                                                                                                                                                                                                                                                       |              |
| 16 | Data monitoring                 | 21a | Composition of data monitoring committee (DMC); summary of its role and reporting structure; statement of whether it is independent from the sponsor and competing interests; and reference to where further details about its charter can be found, if not in the protocol. Alternatively, an explanation of why a DMC is not needed | <u>13</u>    |
| 17 |                                 |     |                                                                                                                                                                                                                                                                                                                                       |              |
| 18 |                                 |     |                                                                                                                                                                                                                                                                                                                                       |              |
| 19 |                                 |     |                                                                                                                                                                                                                                                                                                                                       |              |
| 20 |                                 |     |                                                                                                                                                                                                                                                                                                                                       |              |
| 21 |                                 |     |                                                                                                                                                                                                                                                                                                                                       |              |
| 22 |                                 | 21b | Description of any interim analyses and stopping guidelines, including who will have access to these interim results and make the final decision to terminate the trial                                                                                                                                                               | <u>N/A</u>   |
| 23 |                                 |     |                                                                                                                                                                                                                                                                                                                                       |              |
| 24 |                                 |     |                                                                                                                                                                                                                                                                                                                                       |              |
| 25 | Harms                           | 22  | Plans for collecting, assessing, reporting, and managing solicited and spontaneously reported adverse events and other unintended effects of trial interventions or trial conduct                                                                                                                                                     | <u>13</u>    |
| 26 |                                 |     |                                                                                                                                                                                                                                                                                                                                       |              |
| 27 |                                 |     |                                                                                                                                                                                                                                                                                                                                       |              |
| 28 | Auditing                        | 23  | Frequency and procedures for auditing trial conduct, if any, and whether the process will be independent from investigators and the sponsor                                                                                                                                                                                           | <u>13</u>    |
| 29 |                                 |     |                                                                                                                                                                                                                                                                                                                                       |              |
| 30 |                                 |     |                                                                                                                                                                                                                                                                                                                                       |              |
| 31 |                                 |     |                                                                                                                                                                                                                                                                                                                                       |              |
| 32 | <b>Ethics and dissemination</b> |     |                                                                                                                                                                                                                                                                                                                                       |              |
| 33 |                                 |     |                                                                                                                                                                                                                                                                                                                                       |              |
| 34 | Research ethics approval        | 24  | Plans for seeking research ethics committee/institutional review board (REC/IRB) approval                                                                                                                                                                                                                                             | <u>7</u>     |
| 35 |                                 |     |                                                                                                                                                                                                                                                                                                                                       |              |
| 36 |                                 |     |                                                                                                                                                                                                                                                                                                                                       |              |
| 37 | Protocol amendments             | 25  | Plans for communicating important protocol modifications (eg, changes to eligibility criteria, outcomes, analyses) to relevant parties (eg, investigators, REC/IRBs, trial participants, trial registries, journals, regulators)                                                                                                      | <u>7</u>     |
| 38 |                                 |     |                                                                                                                                                                                                                                                                                                                                       |              |
| 39 |                                 |     |                                                                                                                                                                                                                                                                                                                                       |              |
| 40 |                                 |     |                                                                                                                                                                                                                                                                                                                                       |              |
| 41 |                                 |     |                                                                                                                                                                                                                                                                                                                                       |              |
| 42 |                                 |     |                                                                                                                                                                                                                                                                                                                                       |              |

|    |                               |     |                                                                                                                                                                                                                                                                                     |                          |
|----|-------------------------------|-----|-------------------------------------------------------------------------------------------------------------------------------------------------------------------------------------------------------------------------------------------------------------------------------------|--------------------------|
| 1  | Consent or assent             | 26a | Who will obtain informed consent or assent from potential trial participants or authorised surrogates, and how (see Item 32)                                                                                                                                                        | <u>7</u>                 |
| 2  |                               |     |                                                                                                                                                                                                                                                                                     |                          |
| 3  |                               |     |                                                                                                                                                                                                                                                                                     |                          |
| 4  |                               | 26b | Additional consent provisions for collection and use of participant data and biological specimens in ancillary studies, if applicable                                                                                                                                               | <u>7</u>                 |
| 5  |                               |     |                                                                                                                                                                                                                                                                                     |                          |
| 6  |                               |     |                                                                                                                                                                                                                                                                                     |                          |
| 7  | Confidentiality               | 27  | How personal information about potential and enrolled participants will be collected, shared, and maintained in order to protect confidentiality before, during, and after the trial                                                                                                | <u>12</u>                |
| 8  |                               |     |                                                                                                                                                                                                                                                                                     |                          |
| 9  |                               |     |                                                                                                                                                                                                                                                                                     |                          |
| 10 | Declaration of interests      | 28  | Financial and other competing interests for principal investigators for the overall trial and each study site                                                                                                                                                                       | <u>17</u>                |
| 11 |                               |     |                                                                                                                                                                                                                                                                                     |                          |
| 12 |                               |     |                                                                                                                                                                                                                                                                                     |                          |
| 13 | Access to data                | 29  | Statement of who will have access to the final trial dataset, and disclosure of contractual agreements that limit such access for investigators                                                                                                                                     | <u>13</u>                |
| 14 |                               |     |                                                                                                                                                                                                                                                                                     |                          |
| 15 |                               |     |                                                                                                                                                                                                                                                                                     |                          |
| 16 |                               |     |                                                                                                                                                                                                                                                                                     |                          |
| 17 | Ancillary and post-trial care | 30  | Provisions, if any, for ancillary and post-trial care, and for compensation to those who suffer harm from trial participation                                                                                                                                                       | <u>N/A</u>               |
| 18 |                               |     |                                                                                                                                                                                                                                                                                     |                          |
| 19 |                               |     |                                                                                                                                                                                                                                                                                     |                          |
| 20 | Dissemination policy          | 31a | Plans for investigators and sponsor to communicate trial results to participants, healthcare professionals, the public, and other relevant groups (eg, via publication, reporting in results databases, or other data sharing arrangements), including any publication restrictions | <u>15-16</u>             |
| 21 |                               |     |                                                                                                                                                                                                                                                                                     |                          |
| 22 |                               |     |                                                                                                                                                                                                                                                                                     |                          |
| 23 |                               |     |                                                                                                                                                                                                                                                                                     |                          |
| 24 |                               | 31b | Authorship eligibility guidelines and any intended use of professional writers                                                                                                                                                                                                      | <u>N/A</u>               |
| 25 |                               |     |                                                                                                                                                                                                                                                                                     |                          |
| 26 |                               | 31c | Plans, if any, for granting public access to the full protocol, participant-level dataset, and statistical code                                                                                                                                                                     | <u>N/A</u>               |
| 27 |                               |     |                                                                                                                                                                                                                                                                                     |                          |
| 28 |                               |     |                                                                                                                                                                                                                                                                                     |                          |
| 29 | <b>Appendices</b>             |     |                                                                                                                                                                                                                                                                                     |                          |
| 30 |                               |     |                                                                                                                                                                                                                                                                                     |                          |
| 31 | Informed consent materials    | 32  | Model consent form and other related documentation given to participants and authorised surrogates                                                                                                                                                                                  | <u>N/A</u>               |
| 32 |                               |     |                                                                                                                                                                                                                                                                                     |                          |
| 33 |                               |     |                                                                                                                                                                                                                                                                                     |                          |
| 34 | Biological specimens          | 33  | Plans for collection, laboratory evaluation, and storage of biological specimens for genetic or molecular analysis in the current trial and for future use in ancillary studies, if applicable                                                                                      | <u>12-13 and Table 2</u> |
| 35 |                               |     |                                                                                                                                                                                                                                                                                     |                          |
| 36 |                               |     |                                                                                                                                                                                                                                                                                     |                          |

\*It is strongly recommended that this checklist be read in conjunction with the SPIRIT 2013 Explanation & Elaboration for important clarification on the items. Amendments to the protocol should be tracked and dated. The SPIRIT checklist is copyrighted by the SPIRIT Group under the Creative Commons "[Attribution-NonCommercial-NoDerivs 3.0 Unported](https://creativecommons.org/licenses/by-nc-nd/3.0/)" license.
